# Supplementary material for: Mechanism, selectivity, and reactivity of iridium- and rhodium-catalyzed intermolecular ketone α-alkylation with unactivated olefinsviaan enamide directing strategy
Source: Royal Society of Chemistry journal article supplement (doi:10.1039/c8cy00290h), 2018-01-01
Supplement: c8cy00290h1.pdf [file c8cy00290h1.pdf]

## *Supporting Information*

# **Mechanism, Selectivity, and Reactivity of Iridium- and Rhodium-Catalyzed Intermolecular Ketone $\alpha$ -Alkylation with Unactivated Olefins via an Enamide Directing Strategy**

Xiaojie Li<sup>a§</sup>, Hongli Wu<sup>a§</sup>, Yanmin Lang<sup>a</sup>, Genping Huang<sup>a,b\*</sup>

<sup>a</sup>Department of Chemistry, School of Science and Tianjin Key Laboratory of Molecular Optoelectronic Sciences, Tianjin University, Tianjin 300072, P. R. China

<sup>b</sup>National Demonstration Center for Experimental Chemistry & Chemical Engineering Education, National Virtual Simulation Experimental Teaching Center for Chemistry & Chemical Engineering Education, Tianjin University, Tianjin 300072, P. R. China.

E-mail: [gphuang@tju.edu.cn](mailto:gphuang@tju.edu.cn)

Web: <http://genpinghuang.weebly.com>

<sup>§</sup>These authors contributed equally to this work

### **Table of Contents:**

|                                                                                       |                |
|---------------------------------------------------------------------------------------|----------------|
| <b>1. Possibilities of migratory insertion into the Ir-C bond</b>                     | <b>-----S2</b> |
| <b>2. Possibilities of migratory insertion into the Rh-C bond</b>                     | <b>-----S3</b> |
| <b>3. Intermediates resulted from aromatic C(sp<sup>2</sup>)-H oxidative addition</b> | <b>-----S4</b> |
| <b>7. Table of calculated energies and energy corrections</b>                         | <b>-----S5</b> |
| <b>8. Cartesian coordinates</b>                                                       | <b>-----S7</b> |

## 1. Possibilities of migratory insertion into the Ir-C bond.

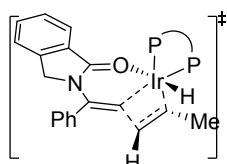

**27.5**  
**TS4a**

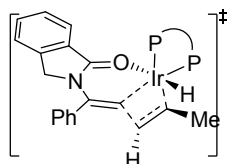

**28.4**

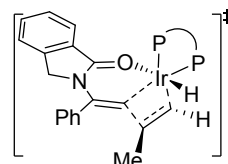

**23.5**  
**TS4b**

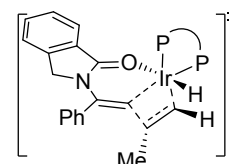

**25.3**

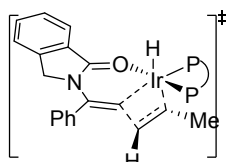

**39.3**

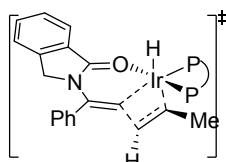

**43.3**

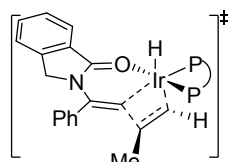

**37.0**

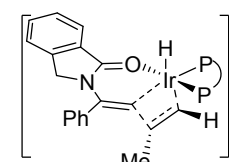

**36.0**

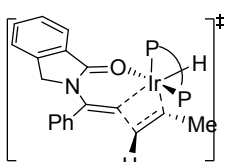

**31.6**

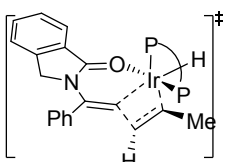

**37.5**

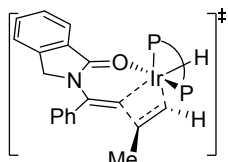

**31.8**

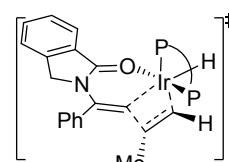

**29.5**

## 2. Possibilities of migratory insertion into the Rh-C bond.

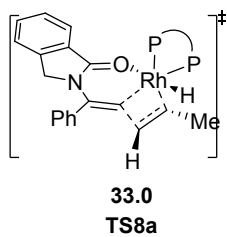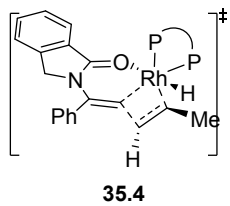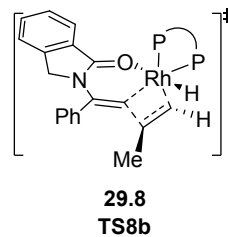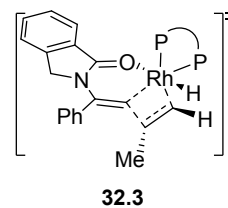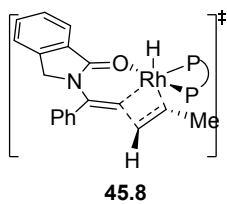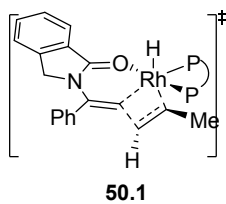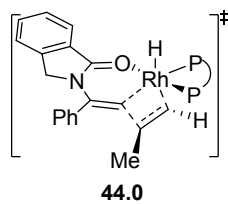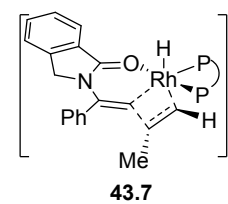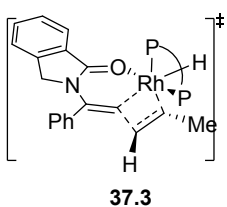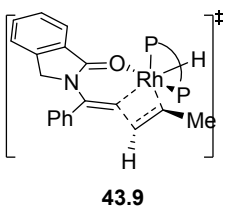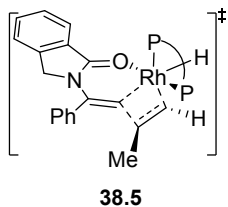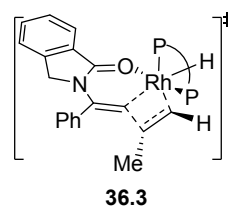

### 3. Intermediates resulted from aromatic C(sp<sup>2</sup>)-H oxidative addition.

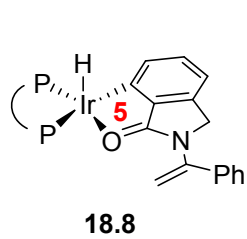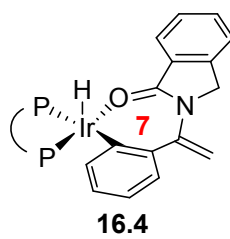

#### 4. Table of calculated energies and energy corrections

| Stationary point           | Single-point energy-<br>B3LYP<br>6-311+G(d,p), SDD<br>with DFT-D3(BJ)<br>correction<br>(a.u.) | Thermal<br>correction to<br>Gibbs free<br>energy at<br>298.15 K<br>(a.u.) | Optimization<br>energy<br>6-31G(d) , lanl2dz<br>(a.u.) | Solvation energy<br>(a.u.) |
|----------------------------|-----------------------------------------------------------------------------------------------|---------------------------------------------------------------------------|--------------------------------------------------------|----------------------------|
| 2a                         | -747.7729019                                                                                  | 0.207191                                                                  | -747.5024492                                           | -0.0067879                 |
| 3a                         | -117.9535685                                                                                  | 0.055102                                                                  | -117.9060442                                           | -0.0008238                 |
| 4a                         | -865.768547                                                                                   | 0.287282                                                                  | -865.4466842                                           | -0.0064069                 |
| 5a                         | -865.7665599                                                                                  | 0.286709                                                                  | -865.4464261                                           | -0.0067396                 |
| cod                        | -312.1506082                                                                                  | 0.149697                                                                  | -312.0257964                                           | -0.0013424                 |
| [Ir(cod)DIOP] <sup>+</sup> | -2450.80481                                                                                   | 0.666004                                                                  | -2450.383488                                           | -0.0402285                 |
| INT1                       | -2886.420154                                                                                  | 0.721271                                                                  | -2885.846423                                           | -0.0398697                 |
| TS1                        | -2886.393372                                                                                  | 0.716774                                                                  | -2885.826307                                           | -0.0405951                 |
| INT2                       | -2886.411865                                                                                  | 0.717885                                                                  | -2885.849097                                           | -0.0432361                 |
| TS1a                       | -2886.373295                                                                                  | 0.713699                                                                  | -2885.804908                                           | -0.0404                    |
| TS1b                       | -2886.372525                                                                                  | 0.717787                                                                  | -2885.794364                                           | -0.0416074                 |
| INT3a                      | -3004.389274                                                                                  | 0.799099                                                                  | -3003.745737                                           | -0.038898                  |
| INT3b                      | -3004.389405                                                                                  | 0.802229                                                                  | -3003.742738                                           | -0.0389564                 |
| TS2a                       | -3004.380273                                                                                  | 0.797344                                                                  | -3003.738568                                           | -0.0392394                 |
| TS2b                       | -3004.378233                                                                                  | 0.79916                                                                   | -3003.733975                                           | -0.0393457                 |
| INT4a                      | -3004.395054                                                                                  | 0.799266                                                                  | -3003.772287                                           | -0.04204                   |
| INT4b                      | -3004.393134                                                                                  | 0.800279                                                                  | -3003.764129                                           | -0.0409801                 |
| TS3a                       | -3004.358676                                                                                  | 0.799281                                                                  | -3003.730868                                           | -0.0397065                 |
| TS3b                       | -3004.353403                                                                                  | 0.801737                                                                  | -3003.721009                                           | -0.0396234                 |
| INT5a                      | -3004.421748                                                                                  | 0.802551                                                                  | -3003.79085                                            | -0.0395928                 |
| INT5b                      | -3004.424516                                                                                  | 0.802377                                                                  | -3003.790671                                           | -0.0395316                 |
| INT6a                      | -3004.400305                                                                                  | 0.800334                                                                  | -3003.757215                                           | -0.0392185                 |
| INT6b                      | -3004.394688                                                                                  | 0.799456                                                                  | -3003.752783                                           | -0.0395165                 |
| TS4a                       | -3004.364432                                                                                  | 0.799324                                                                  | -3003.721932                                           | -0.0395966                 |
| TS4b                       | -3004.369116                                                                                  | 0.798233                                                                  | -3003.730671                                           | -0.0403136                 |
| INT7a                      | -3004.387762                                                                                  | 0.799853                                                                  | -3003.759432                                           | -0.0430667                 |
| INT7b                      | -3004.408213                                                                                  | 0.802985                                                                  | -3003.768622                                           | -0.0403976                 |
| TS5a                       | -3004.364858                                                                                  | 0.799967                                                                  | -3003.731073                                           | -0.0399512                 |
| TS5b                       | -3004.370811                                                                                  | 0.799332                                                                  | -3003.734109                                           | -0.0404732                 |
| [Rh(cod)DIOP] <sup>+</sup> | -2456.986477                                                                                  | 0.665076                                                                  | -2455.183908                                           | -0.040075                  |
| INT8                       | -2892.581725                                                                                  | 0.716631                                                                  | -2890.631393                                           | -0.0416097                 |
| TS6a                       | -3010.547241                                                                                  | 0.797057                                                                  | -3008.516062                                           | -0.039057                  |
| TS6b                       | -3010.546226                                                                                  | 0.797754                                                                  | -3008.512299                                           | -0.0391447                 |

|               |              |          |              |            |
|---------------|--------------|----------|--------------|------------|
| <b>INT9a</b>  | -3010.566854 | 0.799    | -3008.558149 | -0.040656  |
| <b>INT9b</b>  | -3010.565491 | 0.798343 | -3008.552004 | -0.0401603 |
| <b>TS7a</b>   | -3010.544005 | 0.797987 | -3008.533427 | -0.0394479 |
| <b>TS7b</b>   | -3010.538825 | 0.800078 | -3008.52401  | -0.0395198 |
| <b>TS8a</b>   | -3010.538002 | 0.798757 | -3008.509413 | -0.0392292 |
| <b>TS8b</b>   | -3010.541309 | 0.797757 | -3008.516054 | -0.0399608 |
| <b>INT10a</b> | -3010.561858 | 0.79741  | -3008.551046 | -0.0417991 |
| <b>INT10b</b> | -3010.578391 | 0.801146 | -3008.557352 | -0.040304  |
| <b>TS9a</b>   | -3010.549459 | 0.799095 | -3008.535482 | -0.0396117 |
| <b>TS9b</b>   | -3010.552932 | 0.797998 | -3008.536966 | -0.0402521 |

## 5. Cartesian coordinates

cod

|   |             |             |            |
|---|-------------|-------------|------------|
| C | 0.52272600  | 1.16375200  | 6.70902400 |
| H | 0.84519300  | 0.58388900  | 5.84348300 |
| C | 1.06265600  | 0.66898200  | 8.03433000 |
| H | 0.29652600  | 0.69129100  | 8.81347500 |
| H | 1.33438400  | -0.38818400 | 7.92171100 |
| C | 2.32417100  | 1.41860900  | 8.51529700 |
| H | 2.70617900  | 0.91910800  | 9.42056100 |
| H | 3.11529300  | 1.28366000  | 7.76256300 |
| C | 2.20961700  | 2.89771500  | 8.79289500 |
| H | 3.17940200  | 3.38680500  | 8.90111300 |
| C | 1.13358400  | 3.68326400  | 8.92698100 |
| H | 1.32897800  | 4.74065400  | 9.10881900 |
| C | -0.33372400 | 3.32216200  | 8.82977500 |
| H | -0.91311200 | 4.09555000  | 9.34966900 |
| H | -0.55306800 | 2.39027200  | 9.35706500 |
| C | -0.86671000 | 3.24473400  | 7.38248700 |
| H | -0.73979400 | 4.23153600  | 6.91253700 |
| H | -1.95689000 | 3.08627000  | 7.41807800 |
| C | -0.26074000 | 2.21943400  | 6.45519000 |
| H | -0.52093900 | 2.38560400  | 5.40826500 |

[Ir(cod)DIOP]<sup>+</sup>

|   |             |             |             |
|---|-------------|-------------|-------------|
| P | -0.41886600 | 1.70837900  | -0.21048400 |
| P | 1.48303800  | -1.21626200 | 0.42354400  |
| C | -1.67238200 | 2.78506200  | -1.04562100 |
| C | -3.03741900 | 2.60941100  | -0.76281800 |
| C | -1.29622700 | 3.76170400  | -1.98321000 |
| C | -4.00040500 | 3.39171700  | -1.40165700 |
| H | -3.35207000 | 1.87764900  | -0.02426300 |
| C | -2.26262900 | 4.54539000  | -2.61741700 |
| H | -0.24989200 | 3.92716200  | -2.22221500 |
| C | -3.61579700 | 4.36101000  | -2.33016300 |
| H | -5.05084500 | 3.24865100  | -1.16527600 |
| H | -1.95402500 | 5.30251300  | -3.33245900 |
| H | -4.36580200 | 4.97290000  | -2.82251400 |
| C | -1.08340000 | 1.63379300  | 1.50333500  |
| C | -1.06255700 | 2.76234400  | 2.34263300  |
| C | -1.70127800 | 0.46008100  | 1.95569700  |
| C | -1.62594300 | 2.70212200  | 3.61613200  |
| H | -0.61947100 | 3.69418500  | 2.00349700  |
| C | -2.27111400 | 0.40407700  | 3.23034600  |
| H | -1.73486900 | -0.41196300 | 1.31191800  |

|   |             |             |             |
|---|-------------|-------------|-------------|
| C | -2.22874200 | 1.52208900  | 4.06310200  |
| H | -1.59959800 | 3.57796700  | 4.25789000  |
| H | -2.74137100 | -0.51470100 | 3.56811600  |
| H | -2.66761500 | 1.47965600  | 5.05571600  |
| C | 0.50629600  | -2.27223800 | 1.57049100  |
| C | 0.97196400  | -2.55183900 | 2.86577200  |
| C | -0.69467700 | -2.85519600 | 1.13693400  |
| C | 0.24056300  | -3.38499000 | 3.71256100  |
| H | 1.90752200  | -2.12959700 | 3.21965700  |
| C | -1.42077400 | -3.69539500 | 1.98383200  |
| H | -1.06154400 | -2.63777200 | 0.13748900  |
| C | -0.95552700 | -3.95831100 | 3.27374200  |
| H | 0.60867300  | -3.59029800 | 4.71355200  |
| H | -2.34798200 | -4.14239400 | 1.63642000  |
| H | -1.51976100 | -4.61065700 | 3.93393700  |
| C | 2.89036400  | -2.32310800 | -0.04722500 |
| C | 2.68451700  | -3.70586500 | -0.18831100 |
| C | 4.17419200  | -1.80175100 | -0.29050700 |
| C | 3.73120300  | -4.54461700 | -0.57494600 |
| H | 1.71356700  | -4.13936800 | 0.03071200  |
| C | 5.21779600  | -2.64601500 | -0.67364800 |
| H | 4.38510400  | -0.74561700 | -0.15844400 |
| C | 4.99888300  | -4.01676300 | -0.82287000 |
| H | 3.55534400  | -5.61221900 | -0.67041900 |
| H | 6.20564400  | -2.22900300 | -0.84699300 |
| H | 5.81408600  | -4.67031400 | -1.11909200 |
| C | 1.04979100  | 2.85956200  | -0.12754400 |
| H | 1.51443300  | 2.85225900  | -1.11901200 |
| H | 0.67963300  | 3.87505500  | 0.04765300  |
| C | 2.30728200  | 0.03114000  | 1.52601300  |
| H | 1.57268700  | 0.35998400  | 2.26870200  |
| H | 3.12317700  | -0.45680500 | 2.06597500  |
| C | 2.12944600  | 2.55564500  | 0.90818300  |
| H | 1.71592700  | 2.62588600  | 1.92545200  |
| C | 2.89083200  | 1.23206100  | 0.76093300  |
| H | 2.99637000  | 1.00795100  | -0.31368000 |
| O | 3.15856300  | 3.51827700  | 0.72282600  |
| O | 4.15945000  | 1.54414700  | 1.32104000  |
| C | 4.39790500  | 2.96021100  | 1.18802500  |
| C | 5.46317000  | 3.22519100  | 0.13118600  |
| H | 5.58710800  | 4.30185700  | -0.01985200 |
| H | 6.42219400  | 2.80288900  | 0.44562100  |
| H | 5.17096100  | 2.77234400  | -0.82116400 |
| C | 4.75741700  | 3.51121400  | 2.56350000  |



|    |             |             |             |
|----|-------------|-------------|-------------|
| H  | 5.65743000  | 3.01973900  | 2.94553200  |
| H  | 4.94360800  | 4.58761200  | 2.50304700  |
| H  | 3.93984000  | 3.33304300  | 3.26844000  |
| Ir | 0.16082700  | -0.32701800 | -1.37004700 |
| C  | 0.33752500  | -2.27801700 | -2.49456700 |
| H  | 0.61984600  | -3.03677900 | -1.76943700 |
| C  | -0.91430000 | -2.60602500 | -3.29921300 |
| H  | -0.68721200 | -2.57804600 | -4.36906900 |
| H  | -1.20879800 | -3.63853100 | -3.08410600 |
| C  | -2.09716400 | -1.67083900 | -2.96660900 |
| H  | -2.82297700 | -1.66063900 | -3.79387200 |
| H  | -2.63576100 | -2.06517100 | -2.09721600 |
| C  | -1.67825400 | -0.25442500 | -2.63806300 |
| H  | -2.41420300 | 0.30363600  | -2.06153400 |
| C  | -0.70881300 | 0.49844200  | -3.31369300 |
| H  | -0.75919400 | 1.57477200  | -3.18301000 |
| C  | 0.06352000  | 0.03878500  | -4.54095000 |
| H  | 0.23922800  | 0.90284700  | -5.19029500 |
| H  | -0.54169900 | -0.65957700 | -5.12596000 |
| C  | 1.41763100  | -0.59292300 | -4.16582900 |
| H  | 2.15907300  | 0.20110600  | -4.01885900 |
| H  | 1.79679500  | -1.21652000 | -4.98993900 |
| C  | 1.36649600  | -1.40883300 | -2.89436800 |
| H  | 2.34260500  | -1.57861200 | -2.44485500 |

**2a**

|   |             |            |             |
|---|-------------|------------|-------------|
| C | -2.25403700 | 2.99981100 | -0.28671300 |
| C | -1.38350000 | 2.41730700 | -1.20565800 |
| C | -0.04482100 | 2.17911100 | -0.90331800 |
| C | 0.41276900  | 2.54629500 | 0.36260000  |
| C | -0.45895100 | 3.13377500 | 1.29176500  |
| C | -1.80212000 | 3.36728300 | 0.97775900  |
| C | -3.62210500 | 3.11847300 | -0.90866900 |
| H | 0.60742500  | 1.72042300 | -1.64047200 |
| H | 1.45074300  | 2.37674300 | 0.63507200  |
| H | -0.08411600 | 3.41237900 | 2.27304200  |
| H | -2.46748200 | 3.82314100 | 1.70672000  |
| H | -4.37549600 | 2.52410600 | -0.37289200 |
| N | -3.41886700 | 2.58508900 | -2.26391700 |
| C | -2.11441500 | 2.11041000 | -2.46239200 |
| O | -1.68106200 | 1.56117100 | -3.46139200 |
| H | -3.98223800 | 4.15320800 | -0.93622900 |
| C | -4.60521400 | 1.35499300 | -3.96907500 |
| H | -3.89910500 | 0.53648600 | -3.92493000 |

|   |             |            |             |
|---|-------------|------------|-------------|
| C | -4.49093900 | 2.43619000 | -3.18083700 |
| H | -5.38207000 | 1.31829500 | -4.72474100 |
| C | -5.45040200 | 3.57309600 | -3.25816300 |
| C | -4.99436800 | 4.90228000 | -3.28786300 |
| C | -6.83148900 | 3.33581400 | -3.33544500 |
| C | -5.89426700 | 5.96080400 | -3.40332400 |
| H | -3.92619500 | 5.09839500 | -3.24523700 |
| C | -7.73157900 | 4.39524800 | -3.45349800 |
| H | -7.19460800 | 2.31302600 | -3.28902800 |
| C | -7.26669600 | 5.71128400 | -3.48632500 |
| H | -5.52324800 | 6.98184500 | -3.43629900 |
| H | -8.79780000 | 4.19221800 | -3.50961500 |
| H | -7.96771200 | 6.53702800 | -3.57291000 |

**INT1**

|   |             |             |             |
|---|-------------|-------------|-------------|
| P | -0.75882400 | 1.41332700  | 0.03378100  |
| P | 1.28463300  | -1.41470200 | 0.20488400  |
| C | -2.22905300 | 2.29265000  | -0.65370000 |
| C | -3.51420300 | 1.84911200  | -0.30544500 |
| C | -2.09802100 | 3.38194000  | -1.52708600 |
| C | -4.64499900 | 2.48849900  | -0.81344200 |
| H | -3.63757200 | 1.01537300  | 0.37944200  |
| C | -3.23218000 | 4.02674000  | -2.02536700 |
| H | -1.11834500 | 3.73888600  | -1.82618600 |
| C | -4.50717400 | 3.58155200  | -1.67154700 |
| H | -5.63323800 | 2.13931100  | -0.52808100 |
| H | -3.11549700 | 4.88295900  | -2.68419500 |
| H | -5.38807500 | 4.08727000  | -2.05651000 |
| C | -1.20879000 | 1.23327500  | 1.80747800  |
| C | -1.13688000 | 2.32278900  | 2.69340900  |
| C | -1.71962400 | 0.01230100  | 2.26931300  |
| C | -1.54836800 | 2.18099700  | 4.01785000  |
| H | -0.77154200 | 3.28758600  | 2.35466200  |
| C | -2.13760900 | -0.12492700 | 3.59518600  |
| H | -1.78491000 | -0.83412500 | 1.59476500  |
| C | -2.04763000 | 0.95659500  | 4.47147900  |
| H | -1.48369500 | 3.02823700  | 4.69442900  |
| H | -2.52483600 | -1.07959300 | 3.93877300  |
| H | -2.36778100 | 0.85019600  | 5.50394900  |
| C | 0.52680100  | -2.51606800 | 1.47171000  |
| C | 1.13761000  | -2.71935400 | 2.72044200  |
| C | -0.65880700 | -3.20352600 | 1.17472600  |
| C | 0.56328400  | -3.58034400 | 3.65584000  |
| H | 2.06586000  | -2.21525400 | 2.97049300  |

|    |             |             |             |
|----|-------------|-------------|-------------|
| C  | -1.22751500 | -4.07153600 | 2.10971300  |
| H  | -1.13677200 | -3.05690700 | 0.21205000  |
| C  | -0.62066900 | -4.25773300 | 3.35307000  |
| H  | 1.04338200  | -3.72452600 | 4.61952500  |
| H  | -2.14297000 | -4.60172500 | 1.86261200  |
| H  | -1.06359000 | -4.93095500 | 4.08162300  |
| C  | 2.71996700  | -2.42854500 | -0.39178800 |
| C  | 2.70739900  | -3.82855100 | -0.29769500 |
| C  | 3.85491400  | -1.79824100 | -0.93407800 |
| C  | 3.80096800  | -4.57979700 | -0.73636700 |
| H  | 1.85026200  | -4.33799300 | 0.12855500  |
| C  | 4.94464800  | -2.55188000 | -1.37067400 |
| H  | 3.90964700  | -0.71686500 | -1.00306400 |
| C  | 4.92017900  | -3.94527300 | -1.27515900 |
| H  | 3.77805300  | -5.66232100 | -0.64619000 |
| H  | 5.81652000  | -2.04740700 | -1.77721800 |
| H  | 5.77158100  | -4.53014500 | -1.61111000 |
| C  | 0.57044100  | 2.71407400  | -0.02163700 |
| H  | 0.86119100  | 2.81622000  | -1.07217800 |
| H  | 0.15039500  | 3.67461500  | 0.29522500  |
| C  | 2.16406400  | -0.12543800 | 1.23443200  |
| H  | 1.50646900  | 0.13960600  | 2.06915800  |
| H  | 3.06341900  | -0.57724300 | 1.66162000  |
| C  | 1.82570600  | 2.41918600  | 0.79697600  |
| H  | 1.58868500  | 2.42228700  | 1.87188400  |
| C  | 2.59035600  | 1.13238700  | 0.45426300  |
| H  | 2.52780800  | 0.96651500  | -0.63363800 |
| O  | 2.77733500  | 3.43034900  | 0.49726100  |
| O  | 3.92218600  | 1.46909500  | 0.82671000  |
| C  | 4.09575200  | 2.89206600  | 0.69852100  |
| C  | 4.93315700  | 3.22194400  | -0.53224800 |
| H  | 4.99219500  | 4.30589100  | -0.67087100 |
| H  | 5.94721900  | 2.82728100  | -0.41788900 |
| H  | 4.47966600  | 2.78241000  | -1.42603600 |
| C  | 4.69783200  | 3.41526800  | 1.99797700  |
| H  | 5.66761100  | 2.94349000  | 2.18430200  |
| H  | 4.83940300  | 4.49862800  | 1.94024600  |
| H  | 4.03514000  | 3.18960300  | 2.83871000  |
| Ir | -0.08456300 | -0.43528500 | -1.36942000 |
| C  | -2.52588100 | -0.89172000 | -5.78254900 |
| C  | -2.41737700 | 0.25736100  | -4.98552400 |
| C  | -3.00702600 | 1.46904900  | -5.34572900 |
| C  | -3.71556700 | 1.50813800  | -6.54599100 |
| C  | -3.82673500 | 0.36269800  | -7.34900400 |

|   |             |             |             |
|---|-------------|-------------|-------------|
| C | -3.23742000 | -0.85062900 | -6.97614800 |
| C | -1.79004700 | -2.03343700 | -5.12025300 |
| H | -2.91855900 | 2.34060700  | -4.70513000 |
| H | -4.18887900 | 2.43178500  | -6.86463500 |
| H | -4.38415900 | 0.41822900  | -8.27949600 |
| H | -3.33593900 | -1.72842600 | -7.60838100 |
| H | -2.43184200 | -2.89487700 | -4.90589200 |
| N | -1.32016200 | -1.41020100 | -3.87185600 |
| C | -1.62356500 | -0.09849000 | -3.80950600 |
| O | -1.23918600 | 0.63348800  | -2.86059600 |
| H | -0.93529300 | -2.38843100 | -5.71069600 |
| C | 0.95644100  | -1.42218900 | -3.01165700 |
| C | -0.34053500 | -1.98917600 | -2.96560200 |
| H | 1.18065400  | -0.68341400 | -3.77840100 |
| H | 1.80955900  | -1.98790600 | -2.65918300 |
| C | -0.69218500 | -3.37623000 | -2.55726300 |
| C | 0.25485100  | -4.41158700 | -2.57196200 |
| C | -2.02160100 | -3.68247200 | -2.20753600 |
| C | -0.11221500 | -5.71259000 | -2.22306500 |
| H | 1.27629100  | -4.20583400 | -2.87337100 |
| C | -2.38656000 | -4.98248000 | -1.86496200 |
| H | -2.76391500 | -2.88853700 | -2.19894300 |
| C | -1.43028700 | -6.00305100 | -1.86789800 |
| H | 0.63206200  | -6.50350900 | -2.24670600 |
| H | -3.41717400 | -5.20154900 | -1.59981500 |
| H | -1.71478400 | -7.01849400 | -1.60794900 |

**TS1**

|   |             |             |             |
|---|-------------|-------------|-------------|
| P | 0.42351100  | 1.89381100  | -0.73516200 |
| P | 1.91700500  | -1.24515100 | -0.25110900 |
| C | 0.83955100  | 2.81228200  | -2.28019000 |
| C | 0.07626100  | 2.56015100  | -3.43476400 |
| C | 1.88350600  | 3.74902100  | -2.35060800 |
| C | 0.35135800  | 3.23072900  | -4.62587800 |
| H | -0.73809300 | 1.84463200  | -3.39529000 |
| C | 2.15655200  | 4.41641500  | -3.54729000 |
| H | 2.49129500  | 3.97280400  | -1.48092800 |
| C | 1.39338900  | 4.15906400  | -4.68626500 |
| H | -0.24880400 | 3.02704700  | -5.50828100 |
| H | 2.96653000  | 5.13930800  | -3.58399300 |
| H | 1.60779400  | 4.67957700  | -5.61522100 |
| C | -1.06303800 | 2.73933900  | -0.05334400 |
| C | -1.27554600 | 4.11081100  | -0.26292600 |
| C | -1.96769400 | 2.01719800  | 0.73985600  |

|   |             |             |             |
|---|-------------|-------------|-------------|
| C | -2.37316000 | 4.74827700  | 0.31684400  |
| H | -0.59056700 | 4.68172000  | -0.88324800 |
| C | -3.06126800 | 2.65987400  | 1.32321100  |
| H | -1.81702300 | 0.95152800  | 0.88861900  |
| C | -3.26569100 | 4.02502300  | 1.11199800  |
| H | -2.52993900 | 5.80981500  | 0.14761600  |
| H | -3.75382600 | 2.09314300  | 1.93925300  |
| H | -4.11742500 | 4.52462300  | 1.56494700  |
| C | 2.02965500  | -3.08900100 | -0.22633700 |
| C | 1.23943400  | -3.81674600 | 0.67970200  |
| C | 2.84727500  | -3.78721800 | -1.12673400 |
| C | 1.28287200  | -5.21093100 | 0.69672500  |
| H | 0.58771200  | -3.30123000 | 1.38008500  |
| C | 2.88402300  | -5.18407300 | -1.11136400 |
| H | 3.46232200  | -3.24606800 | -1.83850500 |
| C | 2.10670500  | -5.89794100 | -0.19893000 |
| H | 0.67741600  | -5.75933600 | 1.41292000  |
| H | 3.52581200  | -5.71074500 | -1.81181400 |
| H | 2.14290800  | -6.98342800 | -0.18299300 |
| C | 3.48607300  | -0.70772000 | -1.04014400 |
| C | 4.73359000  | -0.97526100 | -0.44784400 |
| C | 3.44539300  | -0.03808600 | -2.27188900 |
| C | 5.91143800  | -0.56961100 | -1.07360400 |
| H | 4.79115100  | -1.50826800 | 0.49729000  |
| C | 4.62768400  | 0.36627600  | -2.89750400 |
| H | 2.48606800  | 0.16255100  | -2.74074500 |
| C | 5.85988700  | 0.10316600  | -2.29850900 |
| H | 6.86941400  | -0.77983800 | -0.60687300 |
| H | 4.58165300  | 0.88494400  | -3.85062500 |
| H | 6.77961700  | 0.41722800  | -2.78366700 |
| C | 1.75722200  | 2.41648300  | 0.44684100  |
| H | 2.73291600  | 2.26244000  | -0.02625700 |
| H | 1.63558800  | 3.48978600  | 0.62438200  |
| C | 2.12940100  | -0.87954900 | 1.57068500  |
| H | 1.16019900  | -1.05895200 | 2.04775600  |
| H | 2.82750600  | -1.62004100 | 1.97553300  |
| C | 1.70244000  | 1.70661100  | 1.80129100  |
| H | 0.67137200  | 1.41602600  | 2.05867800  |
| C | 2.63817000  | 0.50218700  | 1.96904700  |
| H | 3.58769900  | 0.72006200  | 1.45649500  |
| O | 2.21615100  | 2.60292300  | 2.78091300  |
| O | 2.83899200  | 0.47975200  | 3.37811000  |
| C | 2.75862800  | 1.83101000  | 3.86583200  |
| C | 4.14859600  | 2.37178100  | 4.18298600  |

|             |             |             |             |
|-------------|-------------|-------------|-------------|
| H           | 4.08854300  | 3.42568600  | 4.47192800  |
| H           | 4.59618000  | 1.80682500  | 5.00615000  |
| H           | 4.79575800  | 2.28931300  | 3.30467500  |
| C           | 1.81552200  | 1.84728600  | 5.06387900  |
| H           | 2.19163600  | 1.18617600  | 5.85078600  |
| H           | 1.73207500  | 2.86117400  | 5.46652100  |
| H           | 0.82060200  | 1.50257800  | 4.76652800  |
| Ir          | -0.00190300 | -0.45105400 | -1.20105300 |
| C           | -4.93524800 | -1.00637600 | -3.06805000 |
| C           | -4.15738100 | 0.05918300  | -2.60621800 |
| C           | -4.70326800 | 1.31544300  | -2.33583200 |
| C           | -6.06992100 | 1.48102500  | -2.55484700 |
| C           | -6.85542700 | 0.41601900  | -3.02343500 |
| C           | -6.29871700 | -0.84087000 | -3.28422700 |
| C           | -4.05667100 | -2.21331100 | -3.24590000 |
| H           | -4.08243600 | 2.12415000  | -1.96414400 |
| H           | -6.53541100 | 2.44217700  | -2.35933900 |
| H           | -7.91836600 | 0.57012100  | -3.18450300 |
| H           | -6.92015900 | -1.65666600 | -3.64217300 |
| H           | -4.33380100 | -3.04830200 | -2.59181800 |
| N           | -2.71423900 | -1.71074300 | -2.86089100 |
| C           | -2.78061300 | -0.41031100 | -2.45591500 |
| O           | -1.82718800 | 0.28562100  | -2.01866600 |
| H           | -4.04606200 | -2.58629200 | -4.27275300 |
| C           | -0.46006200 | -2.24428600 | -2.08816300 |
| C           | -1.56918900 | -2.54157600 | -2.82252700 |
| H           | -0.75210800 | -1.80542500 | -0.65096000 |
| H           | 0.30982500  | -3.00767900 | -2.12119400 |
| C           | -1.60942100 | -3.75977200 | -3.67820000 |
| C           | -1.83694100 | -3.66549900 | -5.06315000 |
| C           | -1.36916000 | -5.02345600 | -3.11593900 |
| C           | -1.83146900 | -4.80816700 | -5.86116300 |
| H           | -1.98912100 | -2.68979800 | -5.51862600 |
| C           | -1.36553500 | -6.16583300 | -3.91730000 |
| H           | -1.19013700 | -5.10597200 | -2.04765100 |
| C           | -1.60000400 | -6.06238100 | -5.28945800 |
| H           | -1.99780900 | -4.71902100 | -6.93090300 |
| H           | -1.18479100 | -7.13773600 | -3.46713300 |
| H           | -1.59882200 | -6.95241800 | -5.91187000 |
| <b>INT2</b> |             |             |             |
| P           | 0.38598700  | 1.92546400  | -0.69654300 |
| P           | 1.95356800  | -1.25296200 | -0.35503500 |
| C           | 0.84530300  | 2.87081000  | -2.21428100 |

|   |             |             |             |
|---|-------------|-------------|-------------|
| C | 0.12460700  | 2.61713500  | -3.39609800 |
| C | 1.87970600  | 3.82034000  | -2.24670500 |
| C | 0.43222000  | 3.29511700  | -4.57548100 |
| H | -0.68712600 | 1.89679400  | -3.38630600 |
| C | 2.18590200  | 4.49573300  | -3.43082000 |
| H | 2.45300200  | 4.04972600  | -1.35514500 |
| C | 1.46577300  | 4.23441700  | -4.59693000 |
| H | -0.13684400 | 3.09006300  | -5.47798700 |
| H | 2.98737800  | 5.22903300  | -3.43679000 |
| H | 1.70593600  | 4.76147300  | -5.51583400 |
| C | -1.10439400 | 2.79559800  | -0.04661900 |
| C | -1.26623900 | 4.17965000  | -0.22179900 |
| C | -2.07020500 | 2.08413800  | 0.68094000  |
| C | -2.36784800 | 4.83678000  | 0.32638400  |
| H | -0.53637000 | 4.74604300  | -0.79304800 |
| C | -3.16929500 | 2.74507100  | 1.23360500  |
| H | -1.96890300 | 1.01110900  | 0.80759600  |
| C | -3.32006300 | 4.12139200  | 1.05693900  |
| H | -2.48181200 | 5.90752900  | 0.18280100  |
| H | -3.90764000 | 2.18278800  | 1.79840900  |
| H | -4.17582900 | 4.63540800  | 1.48540400  |
| C | 2.11790200  | -3.08983700 | -0.38817500 |
| C | 1.38005200  | -3.86579700 | 0.52166200  |
| C | 2.92835100  | -3.73546700 | -1.33307000 |
| C | 1.47266900  | -5.25721900 | 0.50140100  |
| H | 0.72877900  | -3.39082600 | 1.24986400  |
| C | 3.01286700  | -5.12976700 | -1.35520100 |
| H | 3.50096600  | -3.15577500 | -2.04982400 |
| C | 2.29068500  | -5.89213600 | -0.43683700 |
| H | 0.90824300  | -5.84437900 | 1.22030200  |
| H | 3.64829100  | -5.61650200 | -2.08943500 |
| H | 2.36388300  | -6.97575100 | -0.45084300 |
| C | 3.49665900  | -0.64866500 | -1.14440600 |
| C | 4.75624500  | -0.92129500 | -0.58033600 |
| C | 3.43026300  | 0.07478900  | -2.34384900 |
| C | 5.91882600  | -0.46729700 | -1.20118200 |
| H | 4.83495000  | -1.49554600 | 0.33863300  |
| C | 4.59701500  | 0.52589100  | -2.96625200 |
| H | 2.46501100  | 0.29065800  | -2.79374400 |
| C | 5.84076100  | 0.25769500  | -2.39440100 |
| H | 6.88585100  | -0.68103300 | -0.75529400 |
| H | 4.52928400  | 1.08661100  | -3.89378700 |
| H | 6.74876600  | 0.60896900  | -2.87598700 |
| C | 1.69410300  | 2.42985500  | 0.52598200  |

|    |             |             |             |
|----|-------------|-------------|-------------|
| H  | 2.67738500  | 2.33762700  | 0.05246800  |
| H  | 1.53818200  | 3.48573700  | 0.76853800  |
| C  | 2.16633800  | -0.93050900 | 1.47208200  |
| H  | 1.21027500  | -1.15940300 | 1.95424100  |
| H  | 2.89141900  | -1.66159900 | 1.84480100  |
| C  | 1.66536000  | 1.63621500  | 1.83411700  |
| H  | 0.64352100  | 1.30298500  | 2.07921900  |
| C  | 2.63856600  | 0.45024300  | 1.92214500  |
| H  | 3.57028200  | 0.72063000  | 1.40173900  |
| O  | 2.16187400  | 2.48583700  | 2.86271100  |
| O  | 2.87080800  | 0.35723700  | 3.32337100  |
| C  | 2.73147500  | 1.66949000  | 3.89767200  |
| C  | 4.09684300  | 2.24451200  | 4.25722400  |
| H  | 3.99225000  | 3.27230200  | 4.61837400  |
| H  | 4.56658700  | 1.64293100  | 5.04109200  |
| H  | 4.74753100  | 2.25031100  | 3.37765800  |
| C  | 1.78526900  | 1.56759600  | 5.08952600  |
| H  | 2.18653000  | 0.87219600  | 5.83328500  |
| H  | 1.65840500  | 2.54840100  | 5.55753900  |
| H  | 0.80599500  | 1.20220000  | 4.76574500  |
| Ir | -0.00156700 | -0.43384200 | -1.24877600 |
| C  | -4.91370500 | -0.97386600 | -3.18342300 |
| C  | -4.13084600 | 0.08907000  | -2.72332600 |
| C  | -4.66105100 | 1.36186400  | -2.50496800 |
| C  | -6.01649900 | 1.54658100  | -2.77399100 |
| C  | -6.80649900 | 0.48447800  | -3.24119000 |
| C  | -6.26552600 | -0.78894200 | -3.45028700 |
| C  | -4.05097700 | -2.19930700 | -3.30123100 |
| H  | -4.03802200 | 2.16921100  | -2.13403900 |
| H  | -6.46932900 | 2.52115000  | -2.61930900 |
| H  | -7.86029000 | 0.65382700  | -3.44210200 |
| H  | -6.89011900 | -1.60243200 | -3.80805100 |
| H  | -4.36443900 | -3.01559500 | -2.64056900 |
| N  | -2.71420800 | -1.71218100 | -2.87954500 |
| C  | -2.77035900 | -0.40611100 | -2.51885400 |
| O  | -1.81310500 | 0.28858300  | -2.07392600 |
| H  | -4.00950200 | -2.59538100 | -4.31867300 |
| C  | -0.46078400 | -2.21720600 | -2.07124900 |
| C  | -1.57971700 | -2.55682700 | -2.77095400 |
| H  | -0.59234400 | -0.70423700 | 0.16617500  |
| H  | 0.27455700  | -3.01820700 | -2.08292600 |
| C  | -1.68082700 | -3.86266200 | -3.48897000 |
| C  | -1.84726500 | -3.91446700 | -4.88429300 |
| C  | -1.55401200 | -5.06602500 | -2.77846600 |



|   |             |             |             |
|---|-------------|-------------|-------------|
| C | -1.89415900 | -5.13955000 | -5.54828900 |
| H | -1.91084000 | -2.99007300 | -5.45393200 |
| C | -1.60332700 | -6.29163200 | -3.44464000 |
| H | -1.41625700 | -5.03436000 | -1.70145500 |
| C | -1.77720600 | -6.33202100 | -4.82898400 |
| H | -2.01192800 | -5.16344600 | -6.62797500 |
| H | -1.50923200 | -7.21505900 | -2.88024600 |
| H | -1.81632800 | -7.28603800 | -5.34671900 |

### 3a

|   |             |             |             |
|---|-------------|-------------|-------------|
| C | -2.74074100 | 0.89785000  | -0.07009600 |
| C | -1.41918200 | 0.84752800  | -0.24285500 |
| H | -3.29169700 | 1.83240300  | -0.13460600 |
| H | -3.32311200 | 0.00338700  | 0.14347300  |
| H | -0.88034000 | 1.77259200  | -0.45412700 |
| C | -0.58285800 | -0.39830100 | -0.17083100 |
| H | 0.18550500  | -0.31795300 | 0.61004400  |
| H | -1.19456300 | -1.28134700 | 0.04322800  |
| H | -0.05066300 | -0.57393500 | -1.11596200 |

### INT3a

|   |             |             |             |
|---|-------------|-------------|-------------|
| P | 0.92543100  | 0.41701300  | -3.23038000 |
| P | 2.05717900  | -1.31262900 | -0.35605900 |
| C | 0.52809600  | -0.43424700 | -4.81968300 |
| C | -0.74743700 | -0.25984300 | -5.38412700 |
| C | 1.44958400  | -1.25747600 | -5.48510100 |
| C | -1.09305900 | -0.89789500 | -6.57471900 |
| H | -1.46373100 | 0.40490900  | -4.91231800 |
| C | 1.10125600  | -1.89599900 | -6.67869600 |
| H | 2.45045800  | -1.40133000 | -5.09340500 |
| C | -0.17058800 | -1.72192100 | -7.22477400 |
| H | -2.07803900 | -0.73681100 | -7.00421500 |
| H | 1.83302000  | -2.51799200 | -7.18654300 |
| H | -0.43674300 | -2.21131300 | -8.15720500 |
| C | 0.31052200  | 2.13430000  | -3.54097200 |
| C | 0.58483600  | 2.72879300  | -4.78668200 |
| C | -0.35718000 | 2.88779900  | -2.56589800 |
| C | 0.20710900  | 4.04522400  | -5.04473000 |
| H | 1.08967400  | 2.16417000  | -5.56516700 |
| C | -0.73585100 | 4.20695100  | -2.82876000 |
| H | -0.58180900 | 2.44368400  | -1.60480900 |
| C | -0.45469600 | 4.78876200  | -4.06461300 |
| H | 0.43127500  | 4.48885100  | -6.01046200 |
| H | -1.24880300 | 4.77953500  | -2.06082600 |

|   |             |             |             |
|---|-------------|-------------|-------------|
| H | -0.74798600 | 5.81533700  | -4.26501800 |
| C | 1.89438700  | -2.21940800 | 1.24442100  |
| C | 2.08991100  | -1.58954400 | 2.48328300  |
| C | 1.53643200  | -3.57885000 | 1.22299300  |
| C | 1.93545700  | -2.30485300 | 3.67387600  |
| H | 2.37418300  | -0.54303100 | 2.53513600  |
| C | 1.38172400  | -4.28914200 | 2.41284100  |
| H | 1.39251000  | -4.08914500 | 0.27493100  |
| C | 1.58092500  | -3.65342200 | 3.64134100  |
| H | 2.09828200  | -1.80508000 | 4.62434400  |
| H | 1.11195800  | -5.34075500 | 2.37974300  |
| H | 1.46472400  | -4.20875100 | 4.56739800  |
| C | 3.09029100  | -2.49545300 | -1.32980100 |
| C | 4.29373400  | -2.96022400 | -0.76629200 |
| C | 2.72598600  | -2.94102800 | -2.60628600 |
| C | 5.11466700  | -3.83692100 | -1.47270900 |
| H | 4.58927100  | -2.64715500 | 0.23102500  |
| C | 3.54751800  | -3.82759600 | -3.30967000 |
| H | 1.79376300  | -2.61281700 | -3.04876300 |
| C | 4.74288600  | -4.27341500 | -2.74785500 |
| H | 6.04168500  | -4.18360400 | -1.02544600 |
| H | 3.24389600  | -4.17215500 | -4.29423500 |
| H | 5.38071800  | -4.96191000 | -3.29451800 |
| C | 2.76382900  | 0.67770300  | -3.33056600 |
| H | 3.27213400  | -0.28561200 | -3.43167800 |
| H | 2.95231900  | 1.24732400  | -4.24555000 |
| C | 3.25223900  | 0.05145600  | 0.07636500  |
| H | 2.67866600  | 0.84931700  | 0.55726500  |
| H | 3.96472500  | -0.33937300 | 0.81016800  |
| C | 3.34787200  | 1.46372600  | -2.15094800 |
| H | 2.58874900  | 2.10657500  | -1.68068900 |
| C | 4.06504800  | 0.63202600  | -1.07841500 |
| H | 4.62917300  | -0.17158000 | -1.57617700 |
| O | 4.42251100  | 2.25836400  | -2.64516500 |
| O | 4.96366700  | 1.58347900  | -0.52161300 |
| C | 5.33283700  | 2.50989100  | -1.56102300 |
| C | 6.74669900  | 2.22575100  | -2.05518600 |
| H | 6.99015000  | 2.87569400  | -2.90140800 |
| H | 7.47073300  | 2.40508600  | -1.25482100 |
| H | 6.83038800  | 1.18491500  | -2.38171000 |
| C | 5.15285100  | 3.92406900  | -1.01999200 |
| H | 5.78466500  | 4.07567400  | -0.13930600 |
| H | 5.42953200  | 4.65907300  | -1.78176400 |
| H | 4.11024800  | 4.08941700  | -0.73226800 |

|              |             |             |             |
|--------------|-------------|-------------|-------------|
| Ir           | 0.04621700  | -0.53704100 | -1.21966200 |
| C            | -4.71066800 | -0.73345500 | -3.73800100 |
| C            | -3.96289300 | 0.23161300  | -3.05885700 |
| C            | -4.39741300 | 1.55217700  | -2.93465000 |
| C            | -5.62352700 | 1.88353400  | -3.51033300 |
| C            | -6.38176800 | 0.91618700  | -4.18792200 |
| C            | -5.93385300 | -0.40366800 | -4.31141600 |
| C            | -3.96155400 | -2.03409800 | -3.70021900 |
| H            | -3.79378500 | 2.28985500  | -2.41597200 |
| H            | -5.99815800 | 2.89989000  | -3.43569300 |
| H            | -7.33443200 | 1.19837800  | -4.62652300 |
| H            | -6.52977800 | -1.14178500 | -4.84076000 |
| H            | -4.51855500 | -2.83689200 | -3.20753200 |
| N            | -2.74391200 | -1.70675900 | -2.92460300 |
| C            | -2.73403300 | -0.40204300 | -2.56648800 |
| O            | -1.84336200 | 0.23015100  | -1.92706800 |
| H            | -3.67657800 | -2.39562000 | -4.69454500 |
| C            | -0.55926300 | -2.38417600 | -2.06517400 |
| C            | -1.71464600 | -2.68249600 | -2.68595600 |
| H            | 0.52726300  | 0.96167100  | -0.68131000 |
| H            | 0.06652500  | -3.26710000 | -1.94767600 |
| C            | -2.04403500 | -4.06728300 | -3.15855300 |
| C            | -1.48811600 | -4.56310000 | -4.34777200 |
| C            | -2.88251400 | -4.90603000 | -2.40547500 |
| C            | -1.76234900 | -5.86530100 | -4.77219600 |
| H            | -0.83848700 | -3.92223400 | -4.93773500 |
| C            | -3.15887000 | -6.20594000 | -2.83104500 |
| H            | -3.30702700 | -4.54038500 | -1.47318400 |
| C            | -2.59962200 | -6.68829800 | -4.01700100 |
| H            | -1.32237500 | -6.23627400 | -5.69398800 |
| H            | -3.80404300 | -6.84428200 | -2.23367600 |
| H            | -2.81287600 | -7.70086800 | -4.34759300 |
| C            | -1.19884200 | -1.37116000 | 0.48565200  |
| C            | -0.78650500 | -0.11808700 | 0.94243700  |
| H            | -0.72197700 | -2.27447700 | 0.84451100  |
| H            | -2.20365400 | -1.49397800 | 0.09321900  |
| H            | 0.08356900  | -0.08921900 | 1.59073000  |
| C            | -1.69497300 | 1.08041800  | 1.04499900  |
| H            | -1.13258400 | 2.01816100  | 1.02690600  |
| H            | -2.43807800 | 1.09800900  | 0.24619000  |
| H            | -2.22581000 | 1.02933000  | 2.00628000  |
| <b>INT3b</b> |             |             |             |
| P            | 0.87786600  | 0.30600500  | -3.13392800 |

|   |             |             |             |
|---|-------------|-------------|-------------|
| P | 2.20540500  | -1.38330200 | -0.31419900 |
| C | 0.40489700  | -0.54282500 | -4.70611000 |
| C | -0.86081800 | -0.30064300 | -5.26749200 |
| C | 1.27135600  | -1.42921300 | -5.36552300 |
| C | -1.25090200 | -0.93400600 | -6.44765100 |
| H | -1.53494500 | 0.41263100  | -4.80453800 |
| C | 0.87913100  | -2.06137700 | -6.54850900 |
| H | 2.26417500  | -1.62752400 | -4.97750400 |
| C | -0.38354300 | -1.82022400 | -7.09065500 |
| H | -2.22665400 | -0.71848200 | -6.87440000 |
| H | 1.57033500  | -2.73160200 | -7.05188900 |
| H | -0.68366000 | -2.30603700 | -8.01454900 |
| C | 0.25524200  | 2.02718900  | -3.41221000 |
| C | 0.49726100  | 2.63144600  | -4.66018200 |
| C | -0.38416400 | 2.77503400  | -2.41360700 |
| C | 0.11595500  | 3.95061200  | -4.89783200 |
| H | 0.97978200  | 2.07258900  | -5.45666300 |
| C | -0.76710800 | 4.09684800  | -2.65643500 |
| H | -0.58410900 | 2.32503600  | -1.44999600 |
| C | -0.51781500 | 4.68784400  | -3.89467900 |
| H | 0.31611400  | 4.40140800  | -5.86550300 |
| H | -1.25783100 | 4.66417000  | -1.87033800 |
| H | -0.81361900 | 5.71669500  | -4.07905100 |
| C | 2.15780300  | -2.27621000 | 1.30232800  |
| C | 2.38684400  | -1.61891500 | 2.52115400  |
| C | 1.85514600  | -3.64917200 | 1.31794700  |
| C | 2.31833100  | -2.31970500 | 3.72786600  |
| H | 2.63128100  | -0.56137000 | 2.54475600  |
| C | 1.78626100  | -4.34514300 | 2.52432700  |
| H | 1.68630800  | -4.18065600 | 0.38582700  |
| C | 2.01753900  | -3.68179400 | 3.73231100  |
| H | 2.50570200  | -1.79809500 | 4.66192000  |
| H | 1.55845500  | -5.40715300 | 2.51961300  |
| H | 1.96799100  | -4.22580400 | 4.67096600  |
| C | 3.18533800  | -2.56484100 | -1.34092300 |
| C | 4.44800900  | -2.97839600 | -0.87559600 |
| C | 2.71536800  | -3.07080800 | -2.55894200 |
| C | 5.22380500  | -3.86209900 | -1.62287500 |
| H | 4.82672800  | -2.62004000 | 0.07742600  |
| C | 3.49263900  | -3.96436600 | -3.30296400 |
| H | 1.73578000  | -2.78342200 | -2.92086500 |
| C | 4.74753700  | -4.35759000 | -2.84043600 |
| H | 6.19765200  | -4.16816700 | -1.25203200 |
| H | 3.10846900  | -4.35600400 | -4.24072700 |

|    |             |             |             |
|----|-------------|-------------|-------------|
| H  | 5.35095300  | -5.05120600 | -3.41875500 |
| C  | 2.70894600  | 0.56044900  | -3.33507600 |
| H  | 3.20761100  | -0.40725900 | -3.43990300 |
| H  | 2.85070800  | 1.10604300  | -4.27259600 |
| C  | 3.40804200  | -0.00293900 | 0.03751800  |
| H  | 2.85255100  | 0.79458500  | 0.53984400  |
| H  | 4.16304900  | -0.37619900 | 0.73699200  |
| C  | 3.35412100  | 1.37476600  | -2.20802300 |
| H  | 2.61621400  | 2.01545800  | -1.70262900 |
| C  | 4.14735600  | 0.57341500  | -1.16763200 |
| H  | 4.69598700  | -0.22861800 | -1.68489100 |
| O  | 4.38512800  | 2.17565100  | -2.77908000 |
| O  | 5.05939600  | 1.54875500  | -0.67860700 |
| C  | 5.34434200  | 2.47025900  | -1.74977300 |
| C  | 6.73706800  | 2.21932300  | -2.31586000 |
| H  | 6.91455400  | 2.86265300  | -3.18325800 |
| H  | 7.49773200  | 2.43258800  | -1.55896700 |
| H  | 6.83378800  | 1.17621300  | -2.63120200 |
| C  | 5.15204900  | 3.88671200  | -1.21858000 |
| H  | 5.82268900  | 4.06797100  | -0.37292200 |
| H  | 5.36934300  | 4.61812200  | -2.00274500 |
| H  | 4.12110900  | 4.02790200  | -0.88027800 |
| Ir | 0.13350600  | -0.62989100 | -1.05740000 |
| C  | -4.55595200 | -0.73666500 | -3.65969200 |
| C  | -3.85520900 | 0.18816800  | -2.88128400 |
| C  | -4.30016500 | 1.50024600  | -2.71197000 |
| C  | -5.48759300 | 1.86477600  | -3.34576900 |
| C  | -6.19752600 | 0.93835500  | -4.12515800 |
| C  | -5.73935900 | -0.37305500 | -4.29309100 |
| C  | -3.81106700 | -2.03999400 | -3.64226500 |
| H  | -3.73429100 | 2.20655800  | -2.11351700 |
| H  | -5.86925900 | 2.87546500  | -3.23752100 |
| H  | -7.12047100 | 1.24586500  | -4.60808400 |
| H  | -6.29814500 | -1.07969400 | -4.90025800 |
| H  | -4.40136100 | -2.86337400 | -3.22954000 |
| N  | -2.64665000 | -1.75836500 | -2.77375400 |
| C  | -2.65500500 | -0.47168100 | -2.35354500 |
| O  | -1.79920200 | 0.12560000  | -1.63715300 |
| H  | -3.46006700 | -2.35004200 | -4.63317800 |
| C  | -0.51757600 | -2.48883600 | -1.82432100 |
| C  | -1.65980900 | -2.76280500 | -2.48274800 |
| H  | 0.64926800  | 0.89076800  | -0.62442800 |
| H  | 0.07010800  | -3.39052300 | -1.65781600 |
| C  | -2.01201500 | -4.14496300 | -2.94686800 |

|   |             |             |             |
|---|-------------|-------------|-------------|
| C | -1.35580200 | -4.70556800 | -4.05325500 |
| C | -2.96785000 | -4.92064000 | -2.26887400 |
| C | -1.64370700 | -6.00780500 | -4.46830700 |
| H | -0.62009000 | -4.11197500 | -4.58899200 |
| C | -3.25784200 | -6.22042200 | -2.68477900 |
| H | -3.47579300 | -4.50804500 | -1.40001800 |
| C | -2.59603800 | -6.76739400 | -3.78698800 |
| H | -1.12519800 | -6.42780600 | -5.32600300 |
| H | -3.99380400 | -6.80889700 | -2.14387400 |
| H | -2.82007000 | -7.78011000 | -4.10982900 |
| C | -0.50443500 | -0.14956900 | 1.07695300  |
| C | -0.98974700 | -1.44060200 | 0.86574900  |
| H | 0.39216800  | 0.02113600  | 1.65980500  |
| H | -1.18523500 | 0.69534600  | 1.01902500  |
| H | -0.37798200 | -2.27398600 | 1.19308200  |
| C | -2.45731700 | -1.74590100 | 0.73033600  |
| H | -2.83126500 | -2.05562500 | 1.71612700  |
| H | -3.03424000 | -0.87260800 | 0.41758900  |
| H | -2.64090700 | -2.57203000 | 0.03887200  |

**TS2a**

|   |             |             |             |
|---|-------------|-------------|-------------|
| P | 0.90510100  | 0.47068300  | -3.23271600 |
| P | 2.01836700  | -1.35967500 | -0.38666400 |
| C | 0.46491100  | -0.32561400 | -4.84086600 |
| C | -0.81994100 | -0.11802500 | -5.37206300 |
| C | 1.35100000  | -1.16015700 | -5.53978800 |
| C | -1.20939800 | -0.73428900 | -6.56083000 |
| H | -1.51052100 | 0.55405000  | -4.87254400 |
| C | 0.95919100  | -1.77723400 | -6.73135200 |
| H | 2.35927600  | -1.32824100 | -5.17697600 |
| C | -0.32208400 | -1.57064400 | -7.24305900 |
| H | -2.20134300 | -0.54677400 | -6.96290300 |
| H | 1.66460800  | -2.40827300 | -7.26485500 |
| H | -0.62210200 | -2.04432600 | -8.17332500 |
| C | 0.31769800  | 2.20679800  | -3.48798700 |
| C | 0.58885900  | 2.84996700  | -4.70961000 |
| C | -0.34444400 | 2.92250300  | -2.48249500 |
| C | 0.21341800  | 4.17650100  | -4.91276800 |
| H | 1.08783400  | 2.31383300  | -5.51170700 |
| C | -0.72060900 | 4.25264000  | -2.68770000 |
| H | -0.56890500 | 2.43857700  | -1.54028000 |
| C | -0.44235500 | 4.88217000  | -3.90053200 |
| H | 0.43383800  | 4.65847500  | -5.86088400 |
| H | -1.23035700 | 4.79509200  | -1.89611100 |

|   |             |             |             |
|---|-------------|-------------|-------------|
| H | -0.73405300 | 5.91649700  | -4.05897100 |
| C | 1.84555400  | -2.23557600 | 1.22931000  |
| C | 2.08367600  | -1.59931600 | 2.45713300  |
| C | 1.41171600  | -3.57295000 | 1.23062800  |
| C | 1.89948900  | -2.28778100 | 3.65973500  |
| H | 2.42545700  | -0.56953400 | 2.49308200  |
| C | 1.22899600  | -4.25643400 | 2.43162200  |
| H | 1.22403200  | -4.08594000 | 0.29167300  |
| C | 1.47257300  | -3.61513800 | 3.64970700  |
| H | 2.09605700  | -1.78356500 | 4.60148800  |
| H | 0.90066000  | -5.29167400 | 2.41617900  |
| H | 1.33307300  | -4.14993600 | 4.58459700  |
| C | 3.04639100  | -2.55621100 | -1.34688200 |
| C | 4.19502900  | -3.09191000 | -0.73484300 |
| C | 2.75047800  | -2.92379100 | -2.66584000 |
| C | 5.02899700  | -3.96359900 | -1.43247000 |
| H | 4.43703200  | -2.83781200 | 0.29302100  |
| C | 3.58486200  | -3.80434800 | -3.36075300 |
| H | 1.85929400  | -2.54296800 | -3.14870900 |
| C | 4.72550100  | -4.32249500 | -2.74878100 |
| H | 5.91256500  | -4.36647000 | -0.94608000 |
| H | 3.33400000  | -4.08875200 | -4.37880600 |
| H | 5.37278300  | -5.00695100 | -3.28934900 |
| C | 2.74663600  | 0.70706600  | -3.37092400 |
| H | 3.23744200  | -0.26084900 | -3.50909200 |
| H | 2.93276000  | 1.30222900  | -4.26990700 |
| C | 3.22865000  | -0.00148400 | 0.02821300  |
| H | 2.67395900  | 0.81005500  | 0.50951000  |
| H | 3.93668700  | -0.39976100 | 0.76234500  |
| C | 3.36230000  | 1.44225700  | -2.17590200 |
| H | 2.62511700  | 2.09762100  | -1.68583300 |
| C | 4.05446000  | 0.56255500  | -1.12572200 |
| H | 4.58336900  | -0.25404200 | -1.64036300 |
| O | 4.45812800  | 2.21523100  | -2.65631200 |
| O | 4.99305900  | 1.46802000  | -0.55644900 |
| C | 5.38876000  | 2.40340100  | -1.57719100 |
| C | 6.78521300  | 2.07503000  | -2.09350500 |
| H | 7.04655000  | 2.73575600  | -2.92593100 |
| H | 7.52386200  | 2.20455400  | -1.29686900 |
| H | 6.82351100  | 1.04032100  | -2.44685700 |
| C | 5.27164300  | 3.81056900  | -1.00162100 |
| H | 5.91822500  | 3.91661200  | -0.12498900 |
| H | 5.56958600  | 4.55138100  | -1.74961500 |
| H | 4.23950400  | 4.01092400  | -0.69871800 |

|             |             |             |             |
|-------------|-------------|-------------|-------------|
| Ir          | 0.00576600  | -0.58267200 | -1.24508300 |
| C           | -4.71089100 | -0.88508300 | -3.78340400 |
| C           | -4.00428000 | 0.09998800  | -3.08851000 |
| C           | -4.48547700 | 1.40387900  | -2.96019900 |
| C           | -5.71614900 | 1.69722600  | -3.54685300 |
| C           | -6.43329200 | 0.70948300  | -4.23937700 |
| C           | -5.93860800 | -0.59317500 | -4.36743200 |
| C           | -3.91741900 | -2.15955100 | -3.74841200 |
| H           | -3.91420700 | 2.15894600  | -2.42973900 |
| H           | -6.12621700 | 2.69958200  | -3.46921300 |
| H           | -7.39038400 | 0.96197600  | -4.68633800 |
| H           | -6.50283800 | -1.34731800 | -4.90877100 |
| H           | -4.45220700 | -2.98587600 | -3.27061400 |
| N           | -2.72209900 | -1.79646000 | -2.95498100 |
| C           | -2.76002700 | -0.49573100 | -2.58967100 |
| O           | -1.89096400 | 0.15578000  | -1.93987700 |
| H           | -3.60625400 | -2.49965100 | -4.74254800 |
| C           | -0.50442600 | -2.39528700 | -2.11086100 |
| C           | -1.66114500 | -2.73224800 | -2.71361500 |
| H           | 0.27253500  | 0.88143000  | -0.37887200 |
| H           | 0.15143200  | -3.25576600 | -1.99916800 |
| C           | -1.94389100 | -4.13316200 | -3.16640400 |
| C           | -1.34967000 | -4.63515400 | -4.33416200 |
| C           | -2.77658600 | -4.97987400 | -2.41542900 |
| C           | -1.57971900 | -5.95195600 | -4.73954100 |
| H           | -0.70678500 | -3.98647600 | -4.92312900 |
| C           | -3.00932300 | -6.29397400 | -2.82270100 |
| H           | -3.22963500 | -4.60902100 | -1.49878700 |
| C           | -2.41121600 | -6.78298400 | -3.98692900 |
| H           | -1.11052200 | -6.32764100 | -5.64482700 |
| H           | -3.65025400 | -6.93842300 | -2.22731500 |
| H           | -2.59045200 | -7.80680900 | -4.30271000 |
| C           | -1.11342100 | -1.06413300 | 0.55954400  |
| C           | -0.66068200 | 0.26032800  | 0.87745400  |
| H           | -0.69302500 | -1.90142600 | 1.10404100  |
| H           | -2.16175400 | -1.17898500 | 0.29184800  |
| H           | 0.18858400  | 0.32342400  | 1.55438200  |
| C           | -1.62177700 | 1.42491500  | 0.96179300  |
| H           | -1.10459400 | 2.38928900  | 0.97306100  |
| H           | -2.33411100 | 1.40803000  | 0.13422300  |
| H           | -2.18552500 | 1.33364800  | 1.89964000  |
| <b>TS2b</b> |             |             |             |
| P           | 0.86490100  | 0.37094200  | -3.14823200 |



|   |             |             |             |
|---|-------------|-------------|-------------|
| P | 2.16211100  | -1.43636300 | -0.35509600 |
| C | 0.36445800  | -0.42076500 | -4.74298200 |
| C | -0.90523700 | -0.14827100 | -5.28087000 |
| C | 1.20198000  | -1.31551400 | -5.42844800 |
| C | -1.32728700 | -0.75951200 | -6.46203700 |
| H | -1.55957600 | 0.56897400  | -4.79581700 |
| C | 0.77809200  | -1.92595700 | -6.61188200 |
| H | 2.19796200  | -1.53629400 | -5.06052000 |
| C | -0.48843500 | -1.65447200 | -7.13015500 |
| H | -2.30619800 | -0.52041400 | -6.86865800 |
| H | 1.44776900  | -2.60316300 | -7.13479800 |
| H | -0.81307300 | -2.12374000 | -8.05433900 |
| C | 0.26301400  | 2.10816700  | -3.36973700 |
| C | 0.52204500  | 2.77306100  | -4.58253900 |
| C | -0.39701800 | 2.80487300  | -2.34888400 |
| C | 0.13836000  | 4.10061800  | -4.76202800 |
| H | 1.01866900  | 2.25350100  | -5.39679000 |
| C | -0.78154700 | 4.13620600  | -2.53031900 |
| H | -0.61771800 | 2.30506100  | -1.41440200 |
| C | -0.51399800 | 4.78679300  | -3.73435300 |
| H | 0.35069300  | 4.59888400  | -5.70353200 |
| H | -1.28881900 | 4.66279500  | -1.72657900 |
| H | -0.81127300 | 5.82222400  | -3.87398100 |
| C | 2.11819100  | -2.32265500 | 1.26459200  |
| C | 2.37885200  | -1.67027500 | 2.47963900  |
| C | 1.75854300  | -3.68141800 | 1.28714100  |
| C | 2.28864400  | -2.36350200 | 3.68960200  |
| H | 2.66295900  | -0.62260300 | 2.49922500  |
| C | 1.66884000  | -4.36973000 | 2.49604900  |
| H | 1.55738300  | -4.20765000 | 0.35852100  |
| C | 1.93386600  | -3.71225500 | 3.70063900  |
| H | 2.50087400  | -1.84630400 | 4.62085000  |
| H | 1.39669600  | -5.42124900 | 2.49672900  |
| H | 1.86683500  | -4.25044000 | 4.64156100  |
| C | 3.14741700  | -2.60830700 | -1.38601400 |
| C | 4.37776200  | -3.07172600 | -0.88284800 |
| C | 2.72892800  | -3.04055200 | -2.65060900 |
| C | 5.17237900  | -3.93305100 | -1.63669700 |
| H | 4.71586200  | -2.76929000 | 0.10415600  |
| C | 3.52453500  | -3.91180200 | -3.40109400 |
| H | 1.77406400  | -2.71592300 | -3.04497200 |
| C | 4.74722900  | -4.35564300 | -2.89954700 |
| H | 6.12061700  | -4.27862800 | -1.23546000 |
| H | 3.17993500  | -4.24675000 | -4.37548400 |

|    |             |             |             |
|----|-------------|-------------|-------------|
| H  | 5.36471100  | -5.03208600 | -3.48332500 |
| C  | 2.69778200  | 0.61615800  | -3.37359900 |
| H  | 3.18527500  | -0.35213100 | -3.51967900 |
| H  | 2.84019300  | 1.19652000  | -4.28977700 |
| C  | 3.36728100  | -0.05528000 | -0.00491300 |
| H  | 2.82338600  | 0.74921000  | 0.50023800  |
| H  | 4.11605600  | -0.43620000 | 0.69713700  |
| C  | 3.36279500  | 1.37444400  | -2.22011300 |
| H  | 2.64116200  | 2.02217100  | -1.69772000 |
| C  | 4.12504700  | 0.51886400  | -1.19974500 |
| H  | 4.64526100  | -0.29009600 | -1.73469200 |
| O  | 4.41823200  | 2.16240300  | -2.76255600 |
| O  | 5.07000600  | 1.44888400  | -0.68377100 |
| C  | 5.39144400  | 2.38682800  | -1.72888800 |
| C  | 6.77139900  | 2.09374300  | -2.30647700 |
| H  | 6.97378100  | 2.75289400  | -3.15635100 |
| H  | 7.54208000  | 2.25362800  | -1.54653800 |
| H  | 6.82375100  | 1.05677600  | -2.65122000 |
| C  | 5.26046000  | 3.79484600  | -1.15816700 |
| H  | 5.94067000  | 3.92479700  | -0.31069100 |
| H  | 5.50593000  | 4.53783300  | -1.92288300 |
| H  | 4.23724900  | 3.96993000  | -0.81226900 |
| Ir | 0.08731600  | -0.68679400 | -1.09010400 |
| C  | -4.55230900 | -0.88772600 | -3.74186500 |
| C  | -3.88413600 | 0.06037400  | -2.96245100 |
| C  | -4.36165800 | 1.36317200  | -2.81125300 |
| C  | -5.54897700 | 1.69399000  | -3.46366400 |
| C  | -6.22680800 | 0.74404100  | -4.24318100 |
| C  | -5.73579800 | -0.55770000 | -4.39317700 |
| C  | -3.77605800 | -2.17263000 | -3.70577800 |
| H  | -3.82069300 | 2.08857100  | -2.21235000 |
| H  | -5.95547500 | 2.69641000  | -3.36993400 |
| H  | -7.15034700 | 1.02536500  | -4.74070000 |
| H  | -6.26982100 | -1.28263300 | -5.00102200 |
| H  | -4.35279600 | -3.01005300 | -3.30316600 |
| N  | -2.63577000 | -1.85795700 | -2.81655000 |
| C  | -2.67671100 | -0.56712400 | -2.41468100 |
| O  | -1.83680700 | 0.05068900  | -1.69810500 |
| H  | -3.39661000 | -2.47258500 | -4.68944300 |
| C  | -0.46534200 | -2.51157200 | -1.89476700 |
| C  | -1.61995500 | -2.82544000 | -2.51618400 |
| H  | 0.38177400  | 0.81894700  | -0.31882300 |
| H  | 0.14754300  | -3.39364900 | -1.72150300 |
| C  | -1.94981200 | -4.23171100 | -2.91495200 |

|   |             |             |             |
|---|-------------|-------------|-------------|
| C | -1.26879200 | -4.84458000 | -3.97727700 |
| C | -2.91220100 | -4.97738100 | -2.21256300 |
| C | -1.53854900 | -6.16997700 | -4.32609100 |
| H | -0.53002600 | -4.27256700 | -4.53209100 |
| C | -3.18499000 | -6.29951200 | -2.56372500 |
| H | -3.43593900 | -4.52262100 | -1.37463000 |
| C | -2.49808300 | -6.89945100 | -3.62246200 |
| H | -1.00131100 | -6.63100600 | -5.15048300 |
| H | -3.92622000 | -6.86449100 | -2.00525100 |
| H | -2.70863500 | -7.92983800 | -3.89439100 |
| C | -0.40797800 | 0.20913800  | 0.97564400  |
| C | -0.88155200 | -1.14392300 | 0.84621900  |
| H | 0.43964600  | 0.41579000  | 1.62339900  |
| H | -1.14133700 | 1.01314800  | 0.93771800  |
| H | -0.29298600 | -1.89598900 | 1.36064500  |
| C | -2.36605600 | -1.44600600 | 0.84926400  |
| H | -2.70658000 | -1.59052500 | 1.88365600  |
| H | -2.95545200 | -0.63388400 | 0.41687900  |
| H | -2.58486300 | -2.36874600 | 0.30266900  |

**INT4a**

|   |             |             |             |
|---|-------------|-------------|-------------|
| P | 1.09709800  | 0.63954800  | -3.41725000 |
| P | 1.94899300  | -1.88567700 | -1.00241000 |
| C | 1.20989900  | 0.04241900  | -5.16438500 |
| C | 0.33951700  | -0.96654500 | -5.61051900 |
| C | 2.14027800  | 0.57459300  | -6.07357700 |
| C | 0.40754100  | -1.44102300 | -6.92234700 |
| H | -0.40882400 | -1.37131800 | -4.93685600 |
| C | 2.20810600  | 0.09865100  | -7.38363200 |
| H | 2.81568500  | 1.36849600  | -5.77250900 |
| C | 1.34523300  | -0.91284600 | -7.81072500 |
| H | -0.27451100 | -2.22148600 | -7.24816100 |
| H | 2.93532400  | 0.52182500  | -8.07068400 |
| H | 1.40029800  | -1.28196200 | -8.83082200 |
| C | 0.14385100  | 2.21865800  | -3.56106500 |
| C | -0.56698100 | 2.54169500  | -4.72744300 |
| C | 0.11056700  | 3.11875700  | -2.48213600 |
| C | -1.28413300 | 3.73779000  | -4.81372500 |
| H | -0.55142500 | 1.86872100  | -5.57786600 |
| C | -0.60245900 | 4.31464500  | -2.57271000 |
| H | 0.64426600  | 2.89858400  | -1.56288100 |
| C | -1.30364300 | 4.62740500  | -3.73883200 |
| H | -1.81718900 | 3.97741900  | -5.72988600 |
| H | -0.60691000 | 5.00219200  | -1.73167500 |

|   |             |             |             |
|---|-------------|-------------|-------------|
| H | -1.85594000 | 5.55995000  | -3.81000600 |
| C | 1.69420600  | -3.11923900 | 0.34933000  |
| C | 1.42094100  | -2.69723200 | 1.66101200  |
| C | 1.71728100  | -4.49529200 | 0.07189500  |
| C | 1.18827200  | -3.63066500 | 2.67224900  |
| H | 1.39704100  | -1.64065300 | 1.90926600  |
| C | 1.48039300  | -5.42632600 | 1.08471300  |
| H | 1.92895900  | -4.84510400 | -0.93382400 |
| C | 1.21754800  | -4.99687600 | 2.38657000  |
| H | 0.99050800  | -3.28799600 | 3.68393300  |
| H | 1.50636600  | -6.48747300 | 0.85434700  |
| H | 1.04011100  | -5.72253600 | 3.17503700  |
| C | 3.11094900  | -2.74511600 | -2.14146700 |
| C | 4.36309500  | -3.19497900 | -1.68443800 |
| C | 2.75183000  | -2.97896400 | -3.47572600 |
| C | 5.23582000  | -3.85090900 | -2.55073300 |
| H | 4.65735100  | -3.04485600 | -0.64950100 |
| C | 3.62613500  | -3.64052500 | -4.34207100 |
| H | 1.78892400  | -2.64118000 | -3.84639800 |
| C | 4.86915700  | -4.07385000 | -3.88170300 |
| H | 6.20095700  | -4.19092200 | -2.18658600 |
| H | 3.33270400  | -3.81159900 | -5.37366900 |
| H | 5.55104300  | -4.58657900 | -4.55398000 |
| C | 2.84537600  | 1.23862700  | -3.12765500 |
| H | 3.52110400  | 0.51763300  | -3.60079200 |
| H | 2.96116000  | 2.18991900  | -3.65529300 |
| C | 3.01542700  | -0.63709800 | -0.11529700 |
| H | 2.36687800  | -0.02331300 | 0.51818800  |
| H | 3.66601400  | -1.20438900 | 0.55792600  |
| C | 3.28179800  | 1.46689000  | -1.67836500 |
| H | 2.46227400  | 1.87214800  | -1.06463300 |
| C | 3.91542500  | 0.27071000  | -0.94916400 |
| H | 4.49836300  | -0.32408900 | -1.66870200 |
| O | 4.36074600  | 2.39424700  | -1.71888400 |
| O | 4.78676700  | 0.91596300  | -0.02505500 |
| C | 5.24172000  | 2.14484100  | -0.60982100 |
| C | 6.65933300  | 1.99339000  | -1.15279800 |
| H | 6.96536100  | 2.90587700  | -1.67372800 |
| H | 7.36040200  | 1.80391600  | -0.33445500 |
| H | 6.70660500  | 1.15915200  | -1.85918300 |
| C | 5.10998300  | 3.24595200  | 0.43607400  |
| H | 5.72703600  | 3.01533500  | 1.30999700  |
| H | 5.43501600  | 4.20403700  | 0.01978200  |
| H | 4.06860100  | 3.33559800  | 0.75935000  |

|              |             |             |             |
|--------------|-------------|-------------|-------------|
| Ir           | 0.02513300  | -1.11404900 | -2.01126900 |
| C            | -5.19694900 | -1.13276000 | -3.07628800 |
| C            | -4.09888200 | -0.36009800 | -3.46507000 |
| C            | -4.24314500 | 0.80987100  | -4.21226800 |
| C            | -5.53629000 | 1.18507600  | -4.57436100 |
| C            | -6.64200800 | 0.40935300  | -4.19293900 |
| C            | -6.48606800 | -0.75822100 | -3.43777500 |
| C            | -4.70695300 | -2.30720200 | -2.27656200 |
| H            | -3.37753300 | 1.40373600  | -4.48786500 |
| H            | -5.69346300 | 2.08874500  | -5.15540700 |
| H            | -7.63927400 | 0.72368500  | -4.48653400 |
| H            | -7.35123600 | -1.34607300 | -3.14471900 |
| H            | -5.07867600 | -2.31514300 | -1.24577000 |
| N            | -3.23547700 | -2.12025300 | -2.26943900 |
| C            | -2.88930500 | -0.98885100 | -2.93379300 |
| O            | -1.71987200 | -0.53421700 | -3.07828900 |
| H            | -4.96674600 | -3.26832600 | -2.72752900 |
| C            | -1.05059000 | -2.66103200 | -1.30081500 |
| C            | -2.35085100 | -2.97335200 | -1.55800400 |
| H            | -2.51877500 | -0.01584500 | -0.32958500 |
| H            | -0.56821900 | -3.43617600 | -0.71011600 |
| C            | -2.94071500 | -4.27072100 | -1.10542200 |
| C            | -3.37939300 | -5.23084700 | -2.03413300 |
| C            | -3.01821200 | -4.57131000 | 0.26279800  |
| C            | -3.88902500 | -6.45527800 | -1.60344500 |
| H            | -3.29697800 | -5.02569100 | -3.09919200 |
| C            | -3.52908200 | -5.79741300 | 0.69291500  |
| H            | -2.67644000 | -3.83772000 | 0.98759800  |
| C            | -3.96878400 | -6.74012300 | -0.23764000 |
| H            | -4.21502900 | -7.19069300 | -2.33363600 |
| H            | -3.58646900 | -6.01328300 | 1.75608600  |
| H            | -4.36741100 | -7.69333100 | 0.09746800  |
| C            | -0.35907200 | 0.09714800  | -0.32125200 |
| C            | -1.73651800 | 0.75265100  | -0.31431600 |
| H            | 0.42032000  | 0.86492200  | -0.28444900 |
| H            | -0.25071100 | -0.54256500 | 0.56010700  |
| H            | -1.86994900 | 1.36935900  | -1.20881100 |
| C            | -1.91927000 | 1.62554400  | 0.94053400  |
| H            | -2.91299800 | 2.08717500  | 0.94922400  |
| H            | -1.81619100 | 1.03505300  | 1.85866600  |
| H            | -1.17736700 | 2.43227300  | 0.97737700  |
| <b>INT4b</b> |             |             |             |
| P            | 1.03083100  | 0.64128900  | -3.17183400 |

|   |             |             |             |
|---|-------------|-------------|-------------|
| P | 2.19494100  | -1.85805900 | -0.89110200 |
| C | 0.96880000  | 0.04134600  | -4.92111400 |
| C | 0.03456000  | -0.94063800 | -5.29002800 |
| C | 1.82132100  | 0.56304300  | -5.90845400 |
| C | -0.03725100 | -1.39717000 | -6.60837100 |
| H | -0.65021000 | -1.33935000 | -4.54831500 |
| C | 1.75173200  | 0.10223200  | -7.22353900 |
| H | 2.54297500  | 1.33555100  | -5.66386200 |
| C | 0.82463100  | -0.88059700 | -7.57686500 |
| H | -0.76808800 | -2.15527500 | -6.87635800 |
| H | 2.42108700  | 0.51539700  | -7.97270700 |
| H | 0.77125000  | -1.23651300 | -8.60175100 |
| C | 0.11698900  | 2.24816900  | -3.28003000 |
| C | -1.01812200 | 2.35170000  | -4.10112800 |
| C | 0.52037600  | 3.37540500  | -2.54479600 |
| C | -1.73080600 | 3.54862600  | -4.18089800 |
| H | -1.32984400 | 1.50441100  | -4.70284400 |
| C | -0.19826600 | 4.57029800  | -2.62446100 |
| H | 1.40779100  | 3.34890200  | -1.92162400 |
| C | -1.32723900 | 4.66038000  | -3.43864900 |
| H | -2.59433700 | 3.61728300  | -4.83717500 |
| H | 0.13504000  | 5.43321100  | -2.05499200 |
| H | -1.88061500 | 5.59258600  | -3.50478800 |
| C | 2.22613000  | -3.27031100 | 0.30943100  |
| C | 2.46163300  | -3.08973000 | 1.68134400  |
| C | 2.00198600  | -4.57262800 | -0.16927500 |
| C | 2.47300000  | -4.18290400 | 2.55100400  |
| H | 2.65162100  | -2.10247000 | 2.08931800  |
| C | 2.01006300  | -5.66191300 | 0.70116800  |
| H | 1.83307200  | -4.74190900 | -1.22867700 |
| C | 2.24573500  | -5.47007600 | 2.06435700  |
| H | 2.66613700  | -4.02363200 | 3.60798400  |
| H | 1.83822200  | -6.66110400 | 0.31157700  |
| H | 2.25780400  | -6.31950300 | 2.74108400  |
| C | 3.19267800  | -2.56461200 | -2.27334600 |
| C | 4.54233900  | -2.91147600 | -2.08108700 |
| C | 2.59672700  | -2.82993200 | -3.51307400 |
| C | 5.27808800  | -3.48542000 | -3.11630100 |
| H | 5.02150700  | -2.74683300 | -1.12003100 |
| C | 3.33341400  | -3.40999600 | -4.54942900 |
| H | 1.55289800  | -2.58202100 | -3.67773700 |
| C | 4.67549500  | -3.73332400 | -4.35373000 |
| H | 6.32078800  | -3.74397100 | -2.95602800 |
| H | 2.85512200  | -3.60196100 | -5.50538600 |

|    |             |             |             |
|----|-------------|-------------|-------------|
| H  | 5.25148600  | -4.18192900 | -5.15796900 |
| C  | 2.80351700  | 1.20238200  | -3.02259100 |
| H  | 3.43159900  | 0.44646000  | -3.50591100 |
| H  | 2.91529600  | 2.12918100  | -3.59229600 |
| C  | 3.34946200  | -0.65184700 | -0.05826700 |
| H  | 2.77481400  | -0.10499300 | 0.69486200  |
| H  | 4.09880400  | -1.23817800 | 0.48225700  |
| C  | 3.30754400  | 1.47593400  | -1.59989100 |
| H  | 2.48864200  | 1.78123900  | -0.93041200 |
| C  | 4.10515600  | 0.35153700  | -0.92647100 |
| H  | 4.70266500  | -0.17276100 | -1.68689600 |
| O  | 4.27339800  | 2.51839900  | -1.68557800 |
| O  | 4.95659000  | 1.07551600  | -0.04410500 |
| C  | 5.23686200  | 2.35635800  | -0.62868700 |
| C  | 6.63012400  | 2.37523800  | -1.24929600 |
| H  | 6.79972600  | 3.32215200  | -1.77105400 |
| H  | 7.39251300  | 2.26046900  | -0.47297600 |
| H  | 6.73436300  | 1.55907000  | -1.97050900 |
| C  | 5.03918400  | 3.42108300  | 0.44421000  |
| H  | 5.72237600  | 3.24675800  | 1.28116400  |
| H  | 5.23604500  | 4.41526900  | 0.03208600  |
| H  | 4.01257200  | 3.39080300  | 0.82166400  |
| Ir | 0.12145900  | -1.09776900 | -1.59985700 |
| C  | -5.17416700 | -1.43761900 | -2.23074800 |
| C  | -4.15749300 | -0.61942100 | -2.73218100 |
| C  | -4.43384400 | 0.49861700  | -3.52043200 |
| C  | -5.77041200 | 0.77184800  | -3.80795300 |
| C  | -6.79321500 | -0.05232300 | -3.31443600 |
| C  | -6.50709200 | -1.16598300 | -2.51749700 |
| C  | -4.55603900 | -2.53360800 | -1.41077200 |
| H  | -3.63344100 | 1.13581100  | -3.87987700 |
| H  | -6.02636600 | 1.63322000  | -4.41743900 |
| H  | -7.82692500 | 0.18167300  | -3.55138300 |
| H  | -7.30818800 | -1.79217200 | -2.13526900 |
| H  | -4.85927200 | -2.51087700 | -0.35809200 |
| N  | -3.10384100 | -2.25473800 | -1.51440400 |
| C  | -2.87433600 | -1.14567100 | -2.26021000 |
| O  | -1.74591300 | -0.63590300 | -2.51674700 |
| H  | -4.77907700 | -3.53214500 | -1.79573100 |
| C  | -0.82347400 | -2.63321600 | -0.70337400 |
| C  | -2.12363500 | -3.01596700 | -0.82460300 |
| H  | -1.45734800 | 1.59238200  | -1.11663500 |
| H  | -0.26083200 | -3.33935300 | -0.09821300 |
| C  | -2.61488500 | -4.29551800 | -0.22404200 |

|   |             |             |             |
|---|-------------|-------------|-------------|
| C | -3.04786800 | -5.35797200 | -1.03643900 |
| C | -2.60420700 | -4.47227700 | 1.16758800  |
| C | -3.46505000 | -6.56196700 | -0.46964600 |
| H | -3.03460500 | -5.24680800 | -2.11846500 |
| C | -3.02153900 | -5.67810700 | 1.73448000  |
| H | -2.26731800 | -3.65892300 | 1.80434100  |
| C | -3.45577600 | -6.72376500 | 0.91842100  |
| H | -3.78853100 | -7.37679700 | -1.11133300 |
| H | -3.01018800 | -5.79777000 | 2.81418400  |
| H | -3.78171400 | -7.66129400 | 1.35959600  |
| C | -1.39454500 | 1.09682600  | -0.14738800 |
| C | -0.11817300 | 0.27621500  | 0.03309300  |
| H | -1.41633800 | 1.87649600  | 0.62903600  |
| H | -2.29136400 | 0.48318600  | -0.00797000 |
| H | 0.74572900  | 0.94334200  | -0.05415600 |
| C | -0.11029300 | -0.38249500 | 1.40921600  |
| H | -0.12901900 | 0.39991700  | 2.18359600  |
| H | -0.99170700 | -1.01414700 | 1.55180800  |
| H | 0.76912600  | -1.00212000 | 1.59294300  |

**TS3a**

|   |             |             |             |
|---|-------------|-------------|-------------|
| P | 1.04722500  | 0.55307800  | -3.35946300 |
| P | 1.96179400  | -1.36672700 | -0.58823000 |
| C | 0.56193600  | -0.18065100 | -4.97831700 |
| C | -0.64800100 | 0.19333300  | -5.58709800 |
| C | 1.35755800  | -1.15789500 | -5.59854200 |
| C | -1.04594900 | -0.39139500 | -6.78971300 |
| H | -1.27486700 | 0.95029800  | -5.12874200 |
| C | 0.95622900  | -1.73862400 | -6.80286900 |
| H | 2.29349700  | -1.47747000 | -5.15252800 |
| C | -0.24543300 | -1.35810200 | -7.40173700 |
| H | -1.97969000 | -0.08352200 | -7.25208600 |
| H | 1.58926600  | -2.48471200 | -7.27497300 |
| H | -0.55289000 | -1.80706500 | -8.34185200 |
| C | 0.48792900  | 2.30633400  | -3.44407700 |
| C | 0.73682400  | 3.08168600  | -4.58967200 |
| C | -0.13310200 | 2.90349300  | -2.33733600 |
| C | 0.36871600  | 4.42613500  | -4.62443300 |
| H | 1.20936600  | 2.63715200  | -5.46132100 |
| C | -0.49927800 | 4.25097900  | -2.37458800 |
| H | -0.33036500 | 2.30936900  | -1.44962000 |
| C | -0.24941900 | 5.01290000  | -3.51686700 |
| H | 0.56606200  | 5.01542000  | -5.51530500 |
| H | -0.97742700 | 4.70331500  | -1.51026600 |



|   |             |             |             |
|---|-------------|-------------|-------------|
| H | -0.53301800 | 6.06116200  | -3.54527800 |
| C | 1.74334300  | -2.19096400 | 1.05263100  |
| C | 1.66324400  | -1.42599900 | 2.22850600  |
| C | 1.59844400  | -3.58494900 | 1.14204600  |
| C | 1.45129900  | -2.04095300 | 3.46293500  |
| H | 1.77006800  | -0.34561900 | 2.19205700  |
| C | 1.38067200  | -4.19730900 | 2.37838400  |
| H | 1.67737700  | -4.20011900 | 0.25088700  |
| C | 1.30735300  | -3.42795400 | 3.54069100  |
| H | 1.40234400  | -1.43561500 | 4.36356800  |
| H | 1.28066300  | -5.27775300 | 2.43181900  |
| H | 1.14569800  | -3.90603100 | 4.50246800  |
| C | 2.92508300  | -2.62098000 | -1.53650900 |
| C | 4.19974400  | -3.03177200 | -1.10575900 |
| C | 2.36929300  | -3.21287000 | -2.67980300 |
| C | 4.90702600  | -3.99991500 | -1.81661400 |
| H | 4.64141200  | -2.60560500 | -0.20899300 |
| C | 3.07861700  | -4.18867500 | -3.38694600 |
| H | 1.37833800  | -2.91092300 | -3.00554600 |
| C | 4.34786700  | -4.57923000 | -2.96000400 |
| H | 5.89215500  | -4.30575300 | -1.47633900 |
| H | 2.63417900  | -4.64430900 | -4.26741900 |
| H | 4.89970700  | -5.33620300 | -3.50995600 |
| C | 2.89031200  | 0.74003100  | -3.52308900 |
| H | 3.35070700  | -0.23341900 | -3.71771500 |
| H | 3.07083400  | 1.36824800  | -4.40110700 |
| C | 3.21079200  | -0.04588400 | -0.14174400 |
| H | 2.65688500  | 0.79336900  | 0.29186500  |
| H | 3.84872500  | -0.45346600 | 0.64918900  |
| C | 3.54162600  | 1.40482400  | -2.30974500 |
| H | 2.84970600  | 2.11641800  | -1.83121600 |
| C | 4.12641800  | 0.46363700  | -1.25115800 |
| H | 4.61177000  | -0.38269000 | -1.76001800 |
| O | 4.70925400  | 2.08817100  | -2.75235400 |
| O | 5.11072100  | 1.29117400  | -0.63974400 |
| C | 5.60869100  | 2.20430100  | -1.63614000 |
| C | 6.99798800  | 1.78421500  | -2.10223700 |
| H | 7.33611300  | 2.43139600  | -2.91748000 |
| H | 7.71224500  | 1.85708000  | -1.27663800 |
| H | 6.97923200  | 0.75185000  | -2.46388400 |
| C | 5.56638900  | 3.61242000  | -1.05226000 |
| H | 6.18292000  | 3.66674700  | -0.14962100 |
| H | 5.94490500  | 4.33584200  | -1.78060200 |
| H | 4.53966500  | 3.88247600  | -0.78751300 |

|             |             |             |             |
|-------------|-------------|-------------|-------------|
| Ir          | 0.02180700  | -0.65832000 | -1.57864300 |
| C           | -5.03412300 | -0.95796600 | -3.23916300 |
| C           | -4.05319200 | 0.03682100  | -3.20544800 |
| C           | -4.31659800 | 1.35139100  | -3.59374700 |
| C           | -5.60713500 | 1.64646000  | -4.03231300 |
| C           | -6.59444300 | 0.64997600  | -4.07409300 |
| C           | -6.31995500 | -0.66422000 | -3.67848000 |
| C           | -4.43566400 | -2.24810500 | -2.75105800 |
| H           | -3.54222200 | 2.11090200  | -3.54690300 |
| H           | -5.85443900 | 2.65706200  | -4.34277000 |
| H           | -7.59281800 | 0.90435200  | -4.41765200 |
| H           | -7.09547300 | -1.42408200 | -3.71318700 |
| H           | -4.90364200 | -2.61756200 | -1.83101900 |
| N           | -3.02502500 | -1.88262100 | -2.47276100 |
| C           | -2.81344000 | -0.55771200 | -2.70519500 |
| O           | -1.73988600 | 0.07522200  | -2.52448200 |
| H           | -4.48607200 | -3.04960700 | -3.49215700 |
| C           | -0.99874400 | -2.38649900 | -1.19083000 |
| C           | -2.11080700 | -2.78927000 | -1.88241900 |
| H           | -3.34683700 | -1.54556100 | 0.17455500  |
| H           | -0.43277500 | -3.21261300 | -0.77243400 |
| C           | -2.37096700 | -4.23571200 | -2.10878100 |
| C           | -2.52628200 | -4.75168900 | -3.40950500 |
| C           | -2.42366100 | -5.12648100 | -1.02343900 |
| C           | -2.73506600 | -6.11450700 | -3.61356000 |
| H           | -2.45451200 | -4.08256700 | -4.26367300 |
| C           | -2.62658600 | -6.49136900 | -1.23047400 |
| H           | -2.31770300 | -4.74070000 | -0.01317900 |
| C           | -2.78708000 | -6.98935300 | -2.52464000 |
| H           | -2.84566800 | -6.49673300 | -4.62454900 |
| H           | -2.67052000 | -7.16397900 | -0.37849400 |
| H           | -2.95039000 | -8.05098700 | -2.68530900 |
| C           | -1.22518500 | -1.12850900 | 0.33262600  |
| C           | -2.68756700 | -0.72891600 | 0.48838600  |
| H           | -0.58782700 | -0.29034100 | 0.65686700  |
| H           | -0.96023700 | -1.96477500 | 0.97899400  |
| H           | -2.91817500 | 0.13966900  | -0.13722500 |
| C           | -2.99242900 | -0.37852000 | 1.95556100  |
| H           | -4.04604100 | -0.10226900 | 2.07352500  |
| H           | -2.79231300 | -1.22827800 | 2.61841000  |
| H           | -2.38494900 | 0.46622400  | 2.30040100  |
| <b>TS3b</b> |             |             |             |
| P           | 0.95310900  | 0.55220200  | -3.09032900 |

|   |             |             |             |
|---|-------------|-------------|-------------|
| P | 2.24703700  | -1.36098500 | -0.48212200 |
| C | 0.31860100  | -0.18157500 | -4.65911300 |
| C | -0.94147500 | 0.18396100  | -5.16027800 |
| C | 1.06463400  | -1.15196600 | -5.34835400 |
| C | -1.43685100 | -0.40050300 | -6.32654600 |
| H | -1.53251800 | 0.93306800  | -4.64598800 |
| C | 0.56615800  | -1.73294000 | -6.51543800 |
| H | 2.03671700  | -1.46697300 | -4.98374100 |
| C | -0.68502400 | -1.35922700 | -7.00825900 |
| H | -2.40942400 | -0.09908700 | -6.70563500 |
| H | 1.16135400  | -2.47397600 | -7.04160600 |
| H | -1.06899400 | -1.80815600 | -7.91983300 |
| C | 0.30539300  | 2.27703800  | -3.06297800 |
| C | 0.37118000  | 3.08787900  | -4.20900600 |
| C | -0.19695300 | 2.81938700  | -1.87136000 |
| C | -0.06224100 | 4.41248500  | -4.16092600 |
| H | 0.74976900  | 2.68647500  | -5.14494200 |
| C | -0.62852500 | 4.14690400  | -1.82544500 |
| H | -0.24753500 | 2.19504500  | -0.98373000 |
| C | -0.56265200 | 4.94395700  | -2.96926500 |
| H | -0.00737000 | 5.02930700  | -5.05333900 |
| H | -1.01351400 | 4.55686300  | -0.89590400 |
| H | -0.89719600 | 5.97685600  | -2.93352200 |
| C | 2.32567500  | -2.19235400 | 1.16962000  |
| C | 2.34947400  | -1.42708600 | 2.34803700  |
| C | 2.34214500  | -3.59249500 | 1.27277100  |
| C | 2.39523000  | -2.04722100 | 3.59725900  |
| H | 2.34187600  | -0.34169400 | 2.30130100  |
| C | 2.38396200  | -4.21084000 | 2.52487200  |
| H | 2.34037800  | -4.20525700 | 0.37686600  |
| C | 2.41153700  | -3.44078300 | 3.68875500  |
| H | 2.42403300  | -1.44065400 | 4.49800100  |
| H | 2.40471200  | -5.29521500 | 2.58736100  |
| H | 2.45187000  | -3.92262500 | 4.66131000  |
| C | 3.12379700  | -2.57085700 | -1.56345400 |
| C | 4.46999400  | -2.90920000 | -1.33411500 |
| C | 2.43072200  | -3.20761900 | -2.60332900 |
| C | 5.10921300  | -3.85056600 | -2.13922200 |
| H | 5.02237800  | -2.44779100 | -0.52012500 |
| C | 3.07247100  | -4.15725400 | -3.40449700 |
| H | 1.38744500  | -2.95918600 | -2.77554700 |
| C | 4.41126700  | -4.47613800 | -3.17699400 |
| H | 6.15010300  | -4.09971800 | -1.95400900 |
| H | 2.52175900  | -4.64823800 | -4.20200900 |

|    |             |             |             |
|----|-------------|-------------|-------------|
| H  | 4.91040500  | -5.21277100 | -3.80007600 |
| C  | 2.74835100  | 0.83700900  | -3.48641900 |
| H  | 3.22421700  | -0.10688500 | -3.76891900 |
| H  | 2.77782000  | 1.49247500  | -4.36251900 |
| C  | 3.50076300  | 0.00549900  | -0.19369000 |
| H  | 2.98228400  | 0.82607400  | 0.31392100  |
| H  | 4.24522300  | -0.38460800 | 0.50778100  |
| C  | 3.52529600  | 1.50231100  | -2.35200000 |
| H  | 2.87808400  | 2.18303300  | -1.77580600 |
| C  | 4.25797800  | 0.55356800  | -1.39934400 |
| H  | 4.68811500  | -0.27139800 | -1.98662600 |
| O  | 4.60994600  | 2.22726200  | -2.92072100 |
| O  | 5.29818500  | 1.38836300  | -0.90005300 |
| C  | 5.65167100  | 2.32647700  | -1.93311500 |
| C  | 6.96776500  | 1.92980200  | -2.59283000 |
| H  | 7.18628500  | 2.59626100  | -3.43297100 |
| H  | 7.78764400  | 1.99385900  | -1.87115500 |
| H  | 6.90770000  | 0.90463300  | -2.97031000 |
| C  | 5.67978200  | 3.72114200  | -1.31746100 |
| H  | 6.41548200  | 3.76333400  | -0.50825500 |
| H  | 5.94737400  | 4.46410600  | -2.07477500 |
| H  | 4.69740500  | 3.97341400  | -0.90713600 |
| Ir | 0.17537900  | -0.73869700 | -1.23316600 |
| C  | -5.01913900 | -1.17564100 | -2.41447600 |
| C  | -4.05214900 | -0.17298200 | -2.52976300 |
| C  | -4.37027800 | 1.11656900  | -2.95879400 |
| C  | -5.70070100 | 1.37677700  | -3.28611500 |
| C  | -6.67388100 | 0.37120900  | -3.18054900 |
| C  | -6.34503300 | -0.91686700 | -2.74293500 |
| C  | -4.36111300 | -2.43173500 | -1.91354200 |
| H  | -3.60645500 | 1.88531500  | -3.02375000 |
| H  | -5.99035800 | 2.36741400  | -3.62319400 |
| H  | -7.70384700 | 0.59821300  | -3.43964500 |
| H  | -7.11001800 | -1.68377300 | -2.66109600 |
| H  | -4.73541700 | -2.75046100 | -0.93344000 |
| N  | -2.93589500 | -2.03947700 | -1.79143200 |
| C  | -2.76309100 | -0.72957500 | -2.11749200 |
| O  | -1.68492300 | -0.08315700 | -2.06383800 |
| H  | -4.47191200 | -3.27536100 | -2.59909600 |
| C  | -0.79122200 | -2.44575100 | -0.67558300 |
| C  | -1.95343100 | -2.90096700 | -1.24183600 |
| H  | -2.17390700 | 0.60452700  | 0.26829500  |
| H  | -0.17940700 | -3.24313800 | -0.26536000 |
| C  | -2.18847900 | -4.35951300 | -1.42225100 |

|   |             |             |             |
|---|-------------|-------------|-------------|
| C | -2.46580300 | -4.88769600 | -2.69835800 |
| C | -2.09088900 | -5.24868800 | -0.33879700 |
| C | -2.64883500 | -6.25732200 | -2.87910900 |
| H | -2.50901700 | -4.22068800 | -3.55609600 |
| C | -2.26977100 | -6.62029600 | -0.52292000 |
| H | -1.88402400 | -4.86118300 | 0.65412600  |
| C | -2.55346200 | -7.12947200 | -1.79111200 |
| H | -2.85459100 | -6.64626300 | -3.87250800 |
| H | -2.19703000 | -7.29019100 | 0.32927800  |
| H | -2.69700000 | -8.19668000 | -1.93250900 |
| C | -2.22353000 | -0.27796000 | 0.90699600  |
| C | -0.93695700 | -1.09117100 | 0.91259200  |
| H | -2.40610000 | 0.06394700  | 1.93590000  |
| H | -3.09091700 | -0.88085000 | 0.62042300  |
| H | -0.09178800 | -0.44910100 | 1.17518000  |
| C | -1.01837300 | -2.21974500 | 1.94160200  |
| H | -1.07436100 | -1.75857700 | 2.93772400  |
| H | -1.92186400 | -2.82151200 | 1.80337000  |
| H | -0.15188100 | -2.88024200 | 1.94338500  |

#### INT5a

|   |             |             |             |
|---|-------------|-------------|-------------|
| P | 1.47699900  | 0.78192900  | -0.25744900 |
| P | -1.60988700 | 1.02193400  | 1.29784800  |
| C | 2.80719900  | 0.72008500  | -1.54563200 |
| C | 3.50264700  | -0.46107600 | -1.84192200 |
| C | 3.14130500  | 1.89504200  | -2.24248200 |
| C | 4.52300300  | -0.46198100 | -2.79656700 |
| H | 3.25779500  | -1.39003200 | -1.33771200 |
| C | 4.15148700  | 1.88826600  | -3.20381200 |
| H | 2.62481100  | 2.82408800  | -2.02000700 |
| C | 4.84995900  | 0.70959800  | -3.47870500 |
| H | 5.05975200  | -1.38328800 | -3.00379700 |
| H | 4.40273400  | 2.80685000  | -3.72646600 |
| H | 5.64651300  | 0.70738500  | -4.21724600 |
| C | 1.90747400  | 2.36854000  | 0.58435900  |
| C | 3.13797700  | 2.52371600  | 1.24796600  |
| C | 1.03628300  | 3.46359200  | 0.50539500  |
| C | 3.47228800  | 3.74034800  | 1.84010900  |
| H | 3.84506900  | 1.69990900  | 1.29425600  |
| C | 1.37433900  | 4.68446300  | 1.09724200  |
| H | 0.09479000  | 3.35940400  | -0.02575200 |
| C | 2.58910700  | 4.82245500  | 1.76828600  |
| H | 4.42377300  | 3.84626900  | 2.35329200  |
| H | 0.68664700  | 5.52245700  | 1.03019400  |

|   |             |             |             |
|---|-------------|-------------|-------------|
| H | 2.85342600  | 5.77012600  | 2.22874800  |
| C | -2.34112900 | 2.70001500  | 1.47671400  |
| C | -2.17089200 | 3.48230100  | 2.62985700  |
| C | -3.10482300 | 3.21121500  | 0.41116900  |
| C | -2.75042600 | 4.75086200  | 2.71450200  |
| H | -1.59136300 | 3.11731600  | 3.47088500  |
| C | -3.68379000 | 4.47638000  | 0.50380800  |
| H | -3.25026800 | 2.61211200  | -0.48182100 |
| C | -3.50576500 | 5.25053000  | 1.65337800  |
| H | -2.61059900 | 5.34455400  | 3.61335500  |
| H | -4.27393500 | 4.85904200  | -0.32422800 |
| H | -3.95560000 | 6.23688100  | 1.72188500  |
| C | -2.99578100 | -0.14737900 | 1.63074700  |
| C | -4.08237900 | 0.22846000  | 2.43452000  |
| C | -2.93405900 | -1.45816200 | 1.13389200  |
| C | -5.08510500 | -0.69412200 | 2.73750500  |
| H | -4.15301000 | 1.24052200  | 2.82144100  |
| C | -3.93507300 | -2.37963900 | 1.44285300  |
| H | -2.10345200 | -1.74790100 | 0.49576700  |
| C | -5.01296700 | -1.99838800 | 2.24458200  |
| H | -5.92283200 | -0.39147700 | 3.35930600  |
| H | -3.87542100 | -3.39289300 | 1.05516700  |
| H | -5.79411300 | -2.71445000 | 2.48337800  |
| C | 2.04014500  | -0.55881900 | 0.91941900  |
| H | 1.62744000  | -1.50307800 | 0.54932500  |
| H | 3.13022800  | -0.63298800 | 0.85223600  |
| C | -0.57087700 | 0.81041500  | 2.82345700  |
| H | 0.09846700  | 1.67017000  | 2.92972900  |
| H | -1.25018200 | 0.80390600  | 3.68174000  |
| C | 1.69364300  | -0.39652500 | 2.39794200  |
| H | 2.10798800  | 0.54892300  | 2.77799200  |
| C | 0.22893100  | -0.49591600 | 2.84394200  |
| H | -0.28142700 | -1.28876600 | 2.27422200  |
| O | 2.28226400  | -1.49686800 | 3.08489300  |
| O | 0.37496000  | -0.89403700 | 4.20334800  |
| C | 1.57168100  | -1.68281600 | 4.32138800  |
| C | 1.22981800  | -3.16296600 | 4.45364700  |
| H | 2.14422000  | -3.76440100 | 4.45755900  |
| H | 0.68576200  | -3.34406700 | 5.38542200  |
| H | 0.60652700  | -3.48279300 | 3.61315300  |
| C | 2.38118000  | -1.14250900 | 5.49528100  |
| H | 1.79849200  | -1.20733500 | 6.41943300  |
| H | 3.30168400  | -1.72086000 | 5.61891200  |
| H | 2.64254100  | -0.09417300 | 5.32320900  |

|              |             |             |             |
|--------------|-------------|-------------|-------------|
| Ir           | -0.71817200 | 0.62836700  | -0.90196400 |
| C            | -3.98294300 | -1.55106300 | -4.07142400 |
| C            | -4.29317700 | -0.69162100 | -3.00711900 |
| C            | -5.60816600 | -0.36214900 | -2.67861800 |
| C            | -6.62461800 | -0.91893500 | -3.45380400 |
| C            | -6.32119700 | -1.77998100 | -4.51949900 |
| C            | -4.99887600 | -2.10822000 | -4.83962500 |
| C            | -2.48298200 | -1.70872100 | -4.16633600 |
| H            | -5.82477700 | 0.30215400  | -1.84806900 |
| H            | -7.66184300 | -0.68698100 | -3.23249400 |
| H            | -7.13042300 | -2.20168900 | -5.10848000 |
| H            | -4.78215400 | -2.77761400 | -5.66720200 |
| H            | -2.14878800 | -2.74583300 | -4.05188200 |
| N            | -2.01719600 | -0.88746600 | -3.03764800 |
| C            | -3.03003800 | -0.28096600 | -2.39399800 |
| O            | -2.83354700 | 0.50816400  | -1.43061300 |
| H            | -2.07503900 | -1.32543700 | -5.11034900 |
| C            | -0.21801400 | 0.79214900  | -3.06698900 |
| C            | -0.62694100 | -0.53460400 | -2.76177600 |
| H            | 0.85621700  | 0.92731000  | -3.15506000 |
| C            | 0.26900100  | -1.73335600 | -2.82826800 |
| C            | 1.23696200  | -1.84350200 | -3.83619000 |
| C            | 0.08533500  | -2.81404300 | -1.94755300 |
| C            | 2.01214100  | -2.99992500 | -3.95492300 |
| H            | 1.37805500  | -1.02530300 | -4.53612100 |
| C            | 0.86406800  | -3.96389400 | -2.05982000 |
| H            | -0.66991300 | -2.73968000 | -1.17042600 |
| C            | 1.83147000  | -4.06003000 | -3.06668300 |
| H            | 2.75296200  | -3.07071000 | -4.74622700 |
| H            | 0.71518700  | -4.78797300 | -1.36763900 |
| H            | 2.43212800  | -4.96021200 | -3.16042000 |
| C            | -1.01422600 | 1.81030600  | -3.86034700 |
| C            | -0.57605700 | 3.26279900  | -3.61587500 |
| H            | -0.86984800 | 1.57899800  | -4.92976700 |
| H            | -2.08872400 | 1.72453000  | -3.67141200 |
| H            | 0.50554400  | 3.34795500  | -3.78902400 |
| C            | -1.31867800 | 4.26032900  | -4.51002600 |
| H            | -1.14089400 | 4.05308900  | -5.57228700 |
| H            | -2.40170800 | 4.21716500  | -4.34072200 |
| H            | -0.99254200 | 5.28718400  | -4.31324200 |
| H            | -0.74219000 | 3.51198100  | -2.56004400 |
| <b>INT5b</b> |             |             |             |
| P            | -0.69951300 | 0.13024600  | 1.14541500  |

|   |             |             |             |
|---|-------------|-------------|-------------|
| P | 0.98780800  | -1.92163300 | -1.07608900 |
| C | 0.13753400  | 1.67855400  | 1.67974300  |
| C | 0.88753300  | 1.76198700  | 2.86357700  |
| C | 0.01022500  | 2.82252400  | 0.87055100  |
| C | 1.50039300  | 2.96333900  | 3.22865300  |
| H | 1.00162000  | 0.90068600  | 3.51254800  |
| C | 0.62166500  | 4.01940600  | 1.24230400  |
| H | -0.57585500 | 2.77388600  | -0.04110300 |
| C | 1.37037900  | 4.09250000  | 2.41984700  |
| H | 2.07717800  | 3.01248500  | 4.14781200  |
| H | 0.51372200  | 4.89647500  | 0.61029600  |
| H | 1.84752600  | 5.02542500  | 2.70601700  |
| C | -2.46437400 | 0.33810900  | 1.63728100  |
| C | -2.82927700 | 1.20510000  | 2.67793500  |
| C | -3.45599500 | -0.43348500 | 1.01186000  |
| C | -4.16146000 | 1.29308400  | 3.08584800  |
| H | -2.07882900 | 1.81621300  | 3.16995800  |
| C | -4.78560900 | -0.34755500 | 1.42558400  |
| H | -3.18291900 | -1.09570600 | 0.19467000  |
| C | -5.14071200 | 0.51723600  | 2.46294700  |
| H | -4.43215500 | 1.96922500  | 3.89182900  |
| H | -5.54382200 | -0.95275100 | 0.93631600  |
| H | -6.17617100 | 0.58675000  | 2.78378200  |
| C | 1.70625000  | -2.63838900 | -2.62688300 |
| C | 1.17905400  | -3.79446500 | -3.22009900 |
| C | 2.82062200  | -2.02053000 | -3.22158200 |
| C | 1.76700000  | -4.33346800 | -4.36705800 |
| H | 0.30834300  | -4.28568000 | -2.79850800 |
| C | 3.39743300  | -2.55331800 | -4.37422900 |
| H | 3.25444900  | -1.13301800 | -2.77057000 |
| C | 2.87551200  | -3.71639500 | -4.94622000 |
| H | 1.35313100  | -5.23707400 | -4.80520200 |
| H | 4.26382600  | -2.06863900 | -4.81535700 |
| H | 3.33386100  | -4.13980700 | -5.83538100 |
| C | 2.53586600  | -1.47238600 | -0.17321100 |
| C | 3.45907600  | -2.46379700 | 0.20626100  |
| C | 2.84143700  | -0.12854900 | 0.08222600  |
| C | 4.64546700  | -2.11583700 | 0.84952600  |
| H | 3.26121300  | -3.50994800 | -0.01081100 |
| C | 4.03407400  | 0.21940900  | 0.72407800  |
| H | 2.14810100  | 0.64700400  | -0.22850700 |
| C | 4.93374900  | -0.77277500 | 1.11247100  |
| H | 5.34768600  | -2.89152400 | 1.14125300  |
| H | 4.25479000  | 1.26527300  | 0.91685300  |



|    |             |             |             |
|----|-------------|-------------|-------------|
| H  | 5.86022900  | -0.50414500 | 1.61190100  |
| C  | -0.11893800 | -1.14619900 | 2.36525500  |
| H  | 0.97452800  | -1.12968900 | 2.41401300  |
| H  | -0.50517100 | -0.85866600 | 3.34823100  |
| C  | 0.36174300  | -3.46368600 | -0.22035200 |
| H  | -0.65178900 | -3.64326600 | -0.59330800 |
| H  | 0.97992100  | -4.30663300 | -0.54530700 |
| C  | -0.62218400 | -2.55942200 | 2.05700600  |
| H  | -1.58914500 | -2.53377100 | 1.53024000  |
| C  | 0.35162500  | -3.47603200 | 1.30610000  |
| H  | 1.36598100  | -3.29533700 | 1.69162800  |
| O  | -0.76331700 | -3.25199500 | 3.29324900  |
| O  | -0.09755200 | -4.76701300 | 1.70751600  |
| C  | -0.62015800 | -4.66119700 | 3.04339400  |
| C  | 0.37118700  | -5.22321600 | 4.05655000  |
| H  | 0.00635900  | -5.05858200 | 5.07516200  |
| H  | 0.50460300  | -6.29789000 | 3.90032700  |
| H  | 1.34078800  | -4.72739200 | 3.95129000  |
| C  | -1.97774200 | -5.35486300 | 3.07727100  |
| H  | -1.87223100 | -6.40784400 | 2.79800300  |
| H  | -2.40708500 | -5.29898900 | 4.08205400  |
| H  | -2.66450000 | -4.87538900 | 2.37317200  |
| Ir | -0.54828700 | -0.22916100 | -1.22665900 |
| C  | -4.45826800 | 1.62999100  | -3.81900100 |
| C  | -3.93722800 | 2.12467100  | -2.61421000 |
| C  | -4.51298500 | 3.20490000  | -1.94534100 |
| C  | -5.63877400 | 3.79306200  | -2.52056800 |
| C  | -6.16486100 | 3.30299400  | -3.72559000 |
| C  | -5.58372100 | 2.21538400  | -4.38739700 |
| C  | -3.62078800 | 0.46155400  | -4.28464800 |
| H  | -4.09561300 | 3.56765900  | -1.01141300 |
| H  | -6.11592000 | 4.63764700  | -2.03311100 |
| H  | -7.04295900 | 3.77758900  | -4.15371900 |
| H  | -6.00534500 | 1.84776400  | -5.31856500 |
| H  | -4.18987300 | -0.47118400 | -4.36667300 |
| N  | -2.61610000 | 0.35993200  | -3.21467400 |
| C  | -2.77564900 | 1.30406700  | -2.27071800 |
| O  | -2.00227700 | 1.39535700  | -1.27954000 |
| H  | -3.13478700 | 0.64540200  | -5.25065600 |
| C  | -0.17285200 | 0.06825300  | -3.40543700 |
| C  | -1.45180500 | -0.52243200 | -3.21433400 |
| H  | 0.60414300  | -0.62915200 | -3.71003800 |
| C  | -1.81649800 | -1.90892800 | -3.65161500 |
| C  | -1.36047300 | -2.40992500 | -4.87879400 |

|   |             |             |             |
|---|-------------|-------------|-------------|
| C | -2.70777300 | -2.68787800 | -2.89279500 |
| C | -1.77437500 | -3.66511400 | -5.33232200 |
| H | -0.68672200 | -1.81213200 | -5.48549000 |
| C | -3.11337600 | -3.94371100 | -3.34011600 |
| H | -3.07346200 | -2.29958000 | -1.94630900 |
| C | -2.64686600 | -4.43607300 | -4.56441700 |
| H | -1.41618300 | -4.03539500 | -6.28870000 |
| H | -3.79698400 | -4.53750300 | -2.73967600 |
| H | -2.97026200 | -5.41093700 | -4.91797600 |
| C | 1.44916400  | 2.00534500  | -3.30193100 |
| C | 0.10893700  | 1.49517300  | -3.85456100 |
| H | 2.27825100  | 1.36591600  | -3.62945800 |
| H | 1.65113400  | 3.02106800  | -3.65977300 |
| H | 1.44331200  | 2.01946300  | -2.20773800 |
| H | -0.67853800 | 2.16448200  | -3.49204500 |
| C | 0.10934900  | 1.54868700  | -5.39770800 |
| H | 0.30009800  | 2.57028400  | -5.74574200 |
| H | 0.89352700  | 0.90363300  | -5.81265100 |
| H | -0.84908500 | 1.22423600  | -5.81924500 |

**INT6a**

|   |             |             |             |
|---|-------------|-------------|-------------|
| P | 1.89384300  | 1.53937400  | 0.02121400  |
| P | -1.11116100 | -0.33829900 | 0.83652200  |
| C | 3.39687300  | 1.92081300  | -0.99371800 |
| C | 4.48051500  | 1.02741000  | -1.03768000 |
| C | 3.45785700  | 3.09233500  | -1.76697700 |
| C | 5.59789900  | 1.30249800  | -1.82868500 |
| H | 4.46995400  | 0.11733200  | -0.44449000 |
| C | 4.57522600  | 3.36319000  | -2.55879100 |
| H | 2.63884500  | 3.80511700  | -1.74033100 |
| C | 5.64781100  | 2.47002700  | -2.59187700 |
| H | 6.43066200  | 0.60512900  | -1.84183800 |
| H | 4.60906900  | 4.27824100  | -3.14334700 |
| H | 6.51871600  | 2.68477600  | -3.20414600 |
| C | 1.35528000  | 3.22253200  | 0.55380200  |
| C | 2.19106300  | 4.04215100  | 1.33399800  |
| C | 0.10040600  | 3.70928200  | 0.15904100  |
| C | 1.76978200  | 5.31136700  | 1.72741500  |
| H | 3.17704600  | 3.69617200  | 1.63128900  |
| C | -0.31611500 | 4.98578100  | 0.55224700  |
| H | -0.53715100 | 3.09676700  | -0.46983400 |
| C | 0.51260800  | 5.78469700  | 1.33969700  |
| H | 2.42306000  | 5.93181100  | 2.33413600  |
| H | -1.28979400 | 5.35467200  | 0.24035200  |

|   |             |             |             |
|---|-------------|-------------|-------------|
| H | 0.18627500  | 6.77412100  | 1.64712600  |
| C | -2.84010900 | 0.26633800  | 0.63851300  |
| C | -3.13261100 | 1.62925500  | 0.81287300  |
| C | -3.88047000 | -0.61112300 | 0.29456300  |
| C | -4.43739300 | 2.09960000  | 0.65897200  |
| H | -2.34795500 | 2.33367100  | 1.06964300  |
| C | -5.18532300 | -0.13727900 | 0.14480400  |
| H | -3.67632500 | -1.66777600 | 0.16149400  |
| C | -5.46750600 | 1.21810500  | 0.32627600  |
| H | -4.64900000 | 3.15471400  | 0.80659700  |
| H | -5.98435400 | -0.83202900 | -0.10006200 |
| H | -6.48430400 | 1.58398600  | 0.21646600  |
| C | -1.28745900 | -2.08755300 | 1.39558500  |
| C | -2.19328400 | -2.37976800 | 2.43297000  |
| C | -0.49189700 | -3.12341700 | 0.88588700  |
| C | -2.30551200 | -3.67538300 | 2.93391400  |
| H | -2.82335000 | -1.59927000 | 2.84924500  |
| C | -0.60482800 | -4.42075400 | 1.39137700  |
| H | 0.22218700  | -2.91759000 | 0.09785500  |
| C | -1.51174100 | -4.70023800 | 2.41297300  |
| H | -3.01089200 | -3.88253000 | 3.73337900  |
| H | 0.01883400  | -5.21077500 | 0.98303800  |
| H | -1.59942000 | -5.70959000 | 2.80450400  |
| C | 2.71952800  | 0.83141700  | 1.54855100  |
| H | 2.96602700  | -0.21326500 | 1.33217300  |
| H | 3.66397000  | 1.36294800  | 1.70130000  |
| C | -0.60489900 | 0.48395100  | 2.42812500  |
| H | -0.57431900 | 1.56827400  | 2.28299300  |
| H | -1.39425100 | 0.27374100  | 3.15572300  |
| C | 1.92460600  | 0.90212900  | 2.84682600  |
| H | 1.59859400  | 1.93572500  | 3.03652200  |
| C | 0.72152200  | -0.03053900 | 2.99730100  |
| H | 0.97340900  | -1.02101500 | 2.58769100  |
| O | 2.76896400  | 0.45744900  | 3.90277600  |
| O | 0.60531900  | -0.11275000 | 4.41417200  |
| C | 1.92789800  | -0.01309900 | 4.97345500  |
| C | 2.43544300  | -1.38424100 | 5.40629800  |
| H | 3.47311800  | -1.31364600 | 5.74691500  |
| H | 1.82248200  | -1.77385300 | 6.22459300  |
| H | 2.39269300  | -2.08618700 | 4.56809200  |
| C | 1.88451700  | 1.00248000  | 6.10951000  |
| H | 1.17660400  | 0.67961300  | 6.87921500  |
| H | 2.87459100  | 1.10514900  | 6.56376800  |
| H | 1.56533200  | 1.97838900  | 5.73188800  |

|              |             |             |             |
|--------------|-------------|-------------|-------------|
| Ir           | 0.24885500  | -0.01044500 | -1.05144900 |
| C            | -4.00444600 | 1.79021300  | -3.90156300 |
| C            | -2.99388500 | 2.38431600  | -3.14476800 |
| C            | -2.87398200 | 3.77005900  | -3.03230000 |
| C            | -3.81277200 | 4.55668600  | -3.69864400 |
| C            | -4.83597400 | 3.96303400  | -4.45419400 |
| C            | -4.94338200 | 2.57281000  | -4.56551500 |
| C            | -3.84546800 | 0.29871100  | -3.83209100 |
| H            | -2.07147800 | 4.21408200  | -2.45144500 |
| H            | -3.75299400 | 5.63921400  | -3.63770000 |
| H            | -5.55505500 | 4.59575100  | -4.96628700 |
| H            | -5.73633200 | 2.12645000  | -5.15901000 |
| H            | -4.71510700 | -0.19462200 | -3.38796700 |
| N            | -2.65559600 | 0.11995300  | -2.97062300 |
| C            | -2.15319300 | 1.32186200  | -2.57613500 |
| O            | -1.13124800 | 1.53673400  | -1.87693500 |
| H            | -3.67002100 | -0.16128600 | -4.81090300 |
| C            | -0.97512300 | -1.37146900 | -1.98315200 |
| C            | -2.09040300 | -1.17307700 | -2.71627600 |
| H            | -0.70771800 | -2.42417100 | -1.90786900 |
| C            | -2.80770900 | -2.32586600 | -3.35600300 |
| C            | -2.19293300 | -3.04060200 | -4.39590500 |
| C            | -4.07094800 | -2.75010000 | -2.90998200 |
| C            | -2.82141700 | -4.14433200 | -4.97584800 |
| H            | -1.21453300 | -2.72777300 | -4.75023700 |
| C            | -4.70103500 | -3.85121800 | -3.49009200 |
| H            | -4.55477600 | -2.22252700 | -2.09262400 |
| C            | -4.07844600 | -4.55094500 | -4.52645700 |
| H            | -2.32885100 | -4.68382000 | -5.77999000 |
| H            | -5.67451200 | -4.16879100 | -3.12668400 |
| H            | -4.56870200 | -5.40898600 | -4.97720800 |
| C            | 1.82737000  | -0.69502400 | -2.67459000 |
| C            | 1.37060400  | 0.48003800  | -3.22568100 |
| H            | 2.75221400  | -0.71177100 | -2.11125000 |
| H            | 1.47262000  | -1.65428000 | -3.03944900 |
| H            | 1.90753800  | 1.39149000  | -2.98341000 |
| C            | 0.46084600  | 0.57405300  | -4.41585800 |
| H            | 1.08838200  | 0.66577800  | -5.31371900 |
| H            | -0.16629900 | -0.31198300 | -4.53263800 |
| H            | -0.16736500 | 1.46774000  | -4.37824100 |
| H            | 1.13412100  | -1.16597900 | -0.42137300 |
| <b>INT6b</b> |             |             |             |
| P            | 1.74308000  | 1.07753700  | -0.04258300 |

|   |             |             |             |
|---|-------------|-------------|-------------|
| P | -0.87300900 | -1.20842900 | 0.52761700  |
| C | 3.36780000  | 0.23106900  | -0.28113800 |
| C | 4.37593100  | 0.27815800  | 0.69761700  |
| C | 3.62866900  | -0.45898000 | -1.47591000 |
| C | 5.60422400  | -0.35060600 | 0.48650000  |
| H | 4.21643400  | 0.80819900  | 1.63048700  |
| C | 4.85894500  | -1.08284500 | -1.68908000 |
| H | 2.85733700  | -0.52841700 | -2.23506100 |
| C | 5.84982700  | -1.03174900 | -0.70705600 |
| H | 6.36869600  | -0.30550000 | 1.25687400  |
| H | 5.04012200  | -1.61201400 | -2.62042500 |
| H | 6.80666500  | -1.51919200 | -0.87035100 |
| C | 2.12011500  | 2.85968500  | -0.39374900 |
| C | 3.42833800  | 3.32418100  | -0.59684900 |
| C | 1.06167400  | 3.78463800  | -0.41831800 |
| C | 3.67215700  | 4.68375400  | -0.80750800 |
| H | 4.26323100  | 2.63218100  | -0.59369500 |
| C | 1.31102400  | 5.14199900  | -0.62289400 |
| H | 0.04037900  | 3.43662400  | -0.30398200 |
| C | 2.61731000  | 5.59623400  | -0.81664900 |
| H | 4.69099100  | 5.02576000  | -0.96617500 |
| H | 0.48171700  | 5.84403200  | -0.63997200 |
| H | 2.81030500  | 6.65260500  | -0.97987500 |
| C | -2.18426000 | -2.45721300 | 0.17407200  |
| C | -3.53891100 | -2.21136400 | 0.43902500  |
| C | -1.81126700 | -3.69448200 | -0.37573500 |
| C | -4.49862300 | -3.19068400 | 0.17515300  |
| H | -3.85923800 | -1.26090900 | 0.85385800  |
| C | -2.77365800 | -4.66660800 | -0.64596200 |
| H | -0.76588500 | -3.90950800 | -0.57749600 |
| C | -4.11950800 | -4.41866400 | -0.36698800 |
| H | -5.54321300 | -2.99047500 | 0.39481200  |
| H | -2.46960100 | -5.62166600 | -1.06464600 |
| H | -4.86759600 | -5.17926300 | -0.57024700 |
| C | 0.38833200  | -2.26661100 | 1.35419200  |
| C | 0.09089900  | -2.84836300 | 2.60132900  |
| C | 1.60142400  | -2.58404300 | 0.73052900  |
| C | 1.00218800  | -3.70376400 | 3.21685600  |
| H | -0.85827000 | -2.64810400 | 3.09024300  |
| C | 2.51240200  | -3.44586700 | 1.34879800  |
| H | 1.83762900  | -2.16007500 | -0.23756400 |
| C | 2.21762500  | -4.00185200 | 2.59262100  |
| H | 0.76123500  | -4.14247400 | 4.18078800  |
| H | 3.45087500  | -3.67620000 | 0.85312400  |

|    |             |             |             |
|----|-------------|-------------|-------------|
| H  | 2.92572100  | -4.67025000 | 3.07393100  |
| C  | 1.60184000  | 1.13985800  | 1.82162200  |
| H  | 1.85688900  | 0.15525000  | 2.22705200  |
| H  | 2.35044100  | 1.85103000  | 2.18163500  |
| C  | -1.63691100 | -0.17983100 | 1.87958300  |
| H  | -2.23953100 | 0.58587300  | 1.38176500  |
| H  | -2.31539700 | -0.81638100 | 2.45558400  |
| C  | 0.23807300  | 1.60445800  | 2.34572600  |
| H  | -0.29806600 | 2.21104400  | 1.60291100  |
| C  | -0.68850600 | 0.49792400  | 2.86495500  |
| H  | -0.07814400 | -0.25527900 | 3.38493100  |
| O  | 0.45847600  | 2.36525300  | 3.53140500  |
| O  | -1.49764900 | 1.20073800  | 3.80146600  |
| C  | -0.70880700 | 2.26517600  | 4.36280000  |
| C  | -0.25657200 | 1.91253900  | 5.77578100  |
| H  | 0.41024100  | 2.68816400  | 6.16509600  |
| H  | -1.12133500 | 1.82623700  | 6.44057500  |
| H  | 0.28354200  | 0.96107700  | 5.77255500  |
| C  | -1.53123500 | 3.54804600  | 4.29558200  |
| H  | -2.45909800 | 3.43452500  | 4.86481500  |
| H  | -0.96282800 | 4.38477400  | 4.71258200  |
| H  | -1.78781400 | 3.77696700  | 3.25663800  |
| Ir | -0.18519600 | 0.11159500  | -1.30496900 |
| C  | -4.22320900 | 3.46022700  | -2.42282000 |
| C  | -3.21245100 | 3.46554700  | -1.45912900 |
| C  | -2.91897300 | 4.60391600  | -0.70656700 |
| C  | -3.67074600 | 5.75286000  | -0.94967200 |
| C  | -4.68108500 | 5.75363000  | -1.92382500 |
| C  | -4.96987500 | 4.60716200  | -2.67131900 |
| C  | -4.30237800 | 2.09049600  | -3.03392200 |
| H  | -2.13997200 | 4.58811800  | 0.04927200  |
| H  | -3.47660500 | 6.65683100  | -0.38036100 |
| H  | -5.25221800 | 6.66089300  | -2.09753600 |
| H  | -5.75751300 | 4.61968600  | -3.41935300 |
| H  | -5.28510400 | 1.62965100  | -2.90964800 |
| N  | -3.26622100 | 1.32909100  | -2.29909600 |
| C  | -2.58557800 | 2.13550400  | -1.43838200 |
| O  | -1.57753800 | 1.82956600  | -0.75058000 |
| H  | -4.07226800 | 2.08307900  | -4.10678600 |
| C  | -1.84892400 | -0.67064600 | -2.25204200 |
| C  | -3.01552600 | -0.06351600 | -2.55526800 |
| H  | -1.83975300 | -1.73155200 | -2.49042900 |
| C  | -4.15658800 | -0.81280900 | -3.16440200 |
| C  | -3.97537900 | -1.52599800 | -4.35932500 |

|   |             |             |             |
|---|-------------|-------------|-------------|
| C | -5.41870600 | -0.85902600 | -2.54490000 |
| C | -5.01926300 | -2.26544700 | -4.91804600 |
| H | -3.00892900 | -1.49324500 | -4.85469600 |
| C | -6.46473500 | -1.58984700 | -3.10697300 |
| H | -5.57455100 | -0.33463000 | -1.60504000 |
| C | -6.26855500 | -2.29570400 | -4.29693500 |
| H | -4.85804700 | -2.80884000 | -5.84491600 |
| H | -7.43167400 | -1.61538900 | -2.61180500 |
| H | -7.08378400 | -2.86403400 | -4.73534000 |
| C | 0.75644600  | 1.56913300  | -2.92857200 |
| C | 0.01510600  | 0.69694000  | -3.68959600 |
| H | 0.34875400  | 2.52772900  | -2.62952400 |
| H | 1.83767700  | 1.48507700  | -2.89302500 |
| H | -1.00614600 | 0.97623800  | -3.92447700 |
| C | 0.58044600  | -0.42053700 | -4.52029500 |
| H | 0.61986100  | -0.09226300 | -5.56814400 |
| H | 1.59361900  | -0.69284500 | -4.21303800 |
| H | -0.05171800 | -1.31225700 | -4.47979700 |
| H | 0.70726300  | -1.10320600 | -1.76179300 |

**TS4a**

|   |             |             |             |
|---|-------------|-------------|-------------|
| P | 1.79588600  | 1.06198400  | 0.07284900  |
| P | -0.79338300 | -1.28250200 | 0.53194700  |
| C | 3.42319200  | 0.20056100  | -0.07500900 |
| C | 4.38789000  | 0.31411600  | 0.94017000  |
| C | 3.74847900  | -0.52059800 | -1.23429200 |
| C | 5.63522800  | -0.29623000 | 0.80620600  |
| H | 4.17840200  | 0.88313900  | 1.84004800  |
| C | 5.00127300  | -1.12259700 | -1.37167800 |
| H | 3.01607900  | -0.62187600 | -2.02867700 |
| C | 5.94538200  | -1.01651500 | -0.34922300 |
| H | 6.36596500  | -0.20420500 | 1.60462700  |
| H | 5.23594200  | -1.67590000 | -2.27675500 |
| H | 6.91840700  | -1.48799000 | -0.45323200 |
| C | 2.28012000  | 2.81297200  | -0.28159700 |
| C | 3.24307100  | 3.08785400  | -1.26658800 |
| C | 1.68954600  | 3.88843700  | 0.40364800  |
| C | 3.60106100  | 4.40278700  | -1.56503200 |
| H | 3.73397100  | 2.27438100  | -1.79152000 |
| C | 2.05325100  | 5.20320100  | 0.10347600  |
| H | 0.96753900  | 3.71757100  | 1.19482800  |
| C | 3.00461500  | 5.46503000  | -0.88352000 |
| H | 4.35431000  | 4.59484900  | -2.32393500 |
| H | 1.59840100  | 6.02271100  | 0.65304600  |

|   |             |             |             |
|---|-------------|-------------|-------------|
| H | 3.28792000  | 6.48853500  | -1.11155400 |
| C | -2.02706300 | -2.54439000 | -0.01378000 |
| C | -3.39046700 | -2.46981900 | 0.29989400  |
| C | -1.56654200 | -3.63090800 | -0.77797600 |
| C | -4.27153400 | -3.46747000 | -0.12682300 |
| H | -3.78175000 | -1.64151200 | 0.88166000  |
| C | -2.44780300 | -4.62149800 | -1.20677500 |
| H | -0.51065700 | -3.71620100 | -1.02093700 |
| C | -3.80446500 | -4.54345400 | -0.87947100 |
| H | -5.32416500 | -3.39814800 | 0.13136500  |
| H | -2.07370600 | -5.45986600 | -1.78772500 |
| H | -4.49049800 | -5.31886800 | -1.20762800 |
| C | 0.41680600  | -2.36751600 | 1.41112400  |
| C | 0.07430900  | -2.97472200 | 2.63351600  |
| C | 1.65648800  | -2.66968800 | 0.83229300  |
| C | 0.96277700  | -3.84149700 | 3.26732500  |
| H | -0.89208900 | -2.78518800 | 3.09145000  |
| C | 2.54475300  | -3.54261100 | 1.46707100  |
| H | 1.93268300  | -2.22163300 | -0.11445500 |
| C | 2.20230900  | -4.12550400 | 2.68630200  |
| H | 0.68516300  | -4.29957000 | 4.21236200  |
| H | 3.50387700  | -3.75882400 | 1.00544100  |
| H | 2.89271800  | -4.80201000 | 3.18189400  |
| C | 1.49805500  | 1.10443600  | 1.91174500  |
| H | 1.74728300  | 0.11549000  | 2.31018800  |
| H | 2.19222500  | 1.81979400  | 2.36079700  |
| C | -1.68740700 | -0.38187000 | 1.89356700  |
| H | -2.36646000 | 0.32563400  | 1.40676700  |
| H | -2.30114000 | -1.08784600 | 2.46153000  |
| C | 0.07219300  | 1.51350500  | 2.32325500  |
| H | -0.46080600 | 2.01559900  | 1.50553700  |
| C | -0.81468200 | 0.39133800  | 2.88189100  |
| H | -0.19025500 | -0.30505900 | 3.46127200  |
| O | 0.17779000  | 2.39053300  | 3.44642300  |
| O | -1.69302200 | 1.10037400  | 3.74988800  |
| C | -1.01101800 | 2.26442500  | 4.24357200  |
| C | -0.58960300 | 2.06639600  | 5.69572300  |
| H | -0.00552500 | 2.92443200  | 6.04286300  |
| H | -1.47099500 | 1.95916700  | 6.33514000  |
| H | 0.02609900  | 1.16700200  | 5.78898800  |
| C | -1.92547400 | 3.46880400  | 4.03976500  |
| H | -2.86219600 | 3.33192000  | 4.58897400  |
| H | -1.43838600 | 4.38060200  | 4.39872500  |
| H | -2.16162300 | 3.58529700  | 2.97720800  |



|             |             |             |             |
|-------------|-------------|-------------|-------------|
| Ir          | -0.00737500 | 0.18495200  | -1.20656700 |
| C           | -3.99796200 | 3.58792900  | -2.31902400 |
| C           | -2.99730600 | 3.54724200  | -1.34602100 |
| C           | -2.67217000 | 4.66183800  | -0.57114900 |
| C           | -3.39314000 | 5.83365100  | -0.79218100 |
| C           | -4.40150900 | 5.87909800  | -1.76833400 |
| C           | -4.71413300 | 4.75900900  | -2.54537700 |
| C           | -4.09576200 | 2.24180500  | -2.97918700 |
| H           | -1.88041300 | 4.61045300  | 0.16938000  |
| H           | -3.17383400 | 6.72272200  | -0.20893600 |
| H           | -4.94887100 | 6.80409700  | -1.92429900 |
| H           | -5.49413000 | 4.81063800  | -3.29961800 |
| H           | -5.08648500 | 1.79219400  | -2.88342100 |
| N           | -3.07647700 | 1.43733600  | -2.25923900 |
| C           | -2.39609400 | 2.20853700  | -1.34291000 |
| O           | -1.43548200 | 1.85345700  | -0.63040600 |
| H           | -3.85078600 | 2.27334100  | -4.04821400 |
| C           | -1.60509900 | -0.49238100 | -2.49796000 |
| C           | -2.85365300 | 0.06181600  | -2.54585600 |
| H           | -1.57817900 | -1.55272300 | -2.72910400 |
| C           | -4.05548900 | -0.71623700 | -2.93565600 |
| C           | -4.00139300 | -1.60566100 | -4.02297100 |
| C           | -5.26730600 | -0.59902300 | -2.22719200 |
| C           | -5.12103300 | -2.35029300 | -4.39202400 |
| H           | -3.08099400 | -1.69947100 | -4.59203400 |
| C           | -6.38540500 | -1.34234200 | -2.59825900 |
| H           | -5.32252000 | 0.05915500  | -1.36362000 |
| C           | -6.31762100 | -2.21886600 | -3.68488600 |
| H           | -5.06118300 | -3.02472000 | -5.24140600 |
| H           | -7.30958300 | -1.24188600 | -2.03593100 |
| H           | -7.19153900 | -2.79322200 | -3.97801800 |
| C           | -0.30422700 | 0.42294800  | -3.65402200 |
| C           | 0.60160400  | 1.33719600  | -3.00415600 |
| H           | 0.11018300  | -0.48784600 | -4.07772100 |
| H           | -1.08849100 | 0.87051700  | -4.25752300 |
| H           | 1.65377900  | 1.08063000  | -3.11231400 |
| C           | 0.31490900  | 2.82565100  | -3.11495900 |
| H           | 0.90243500  | 3.26420700  | -3.93243400 |
| H           | -0.74050500 | 3.01511000  | -3.33996800 |
| H           | 0.56503800  | 3.37558800  | -2.20582300 |
| H           | 0.93452500  | -0.98922100 | -1.68031300 |
| <b>TS4b</b> |             |             |             |
| P           | 1.78246400  | 1.10407200  | 0.00548400  |

|   |             |             |             |
|---|-------------|-------------|-------------|
| P | -0.83623400 | -1.19935700 | 0.53662000  |
| C | 3.40327200  | 0.24084100  | -0.18619200 |
| C | 4.34751100  | 0.19720600  | 0.85368600  |
| C | 3.73371800  | -0.35362000 | -1.41514200 |
| C | 5.58078300  | -0.43185600 | 0.67051500  |
| H | 4.13632300  | 0.65466500  | 1.81406300  |
| C | 4.96821000  | -0.97732700 | -1.59887500 |
| H | 3.01687100  | -0.34050200 | -2.22862500 |
| C | 5.89457600  | -1.02106900 | -0.55493500 |
| H | 6.29504100  | -0.45842200 | 1.48851800  |
| H | 5.20416100  | -1.43148900 | -2.55718100 |
| H | 6.85462100  | -1.50914600 | -0.69625400 |
| C | 2.17829900  | 2.86421000  | -0.41058000 |
| C | 3.49908900  | 3.31902100  | -0.54550700 |
| C | 1.12723900  | 3.78610700  | -0.55050700 |
| C | 3.76045000  | 4.66609200  | -0.80654100 |
| H | 4.32972000  | 2.62833300  | -0.44991600 |
| C | 1.39318000  | 5.13191400  | -0.80466900 |
| H | 0.10054100  | 3.44427000  | -0.47709500 |
| C | 2.71078600  | 5.57610100  | -0.93352500 |
| H | 4.78859600  | 5.00076400  | -0.91192900 |
| H | 0.56906200  | 5.83252700  | -0.91001600 |
| H | 2.91747300  | 6.62303600  | -1.13648700 |
| C | -2.14349500 | -2.41664300 | 0.06798200  |
| C | -3.48471800 | -2.29751500 | 0.45618500  |
| C | -1.75998400 | -3.52397600 | -0.70861200 |
| C | -4.41665800 | -3.27433800 | 0.09428300  |
| H | -3.81811700 | -1.45249200 | 1.04997000  |
| C | -2.69194300 | -4.49379700 | -1.07280500 |
| H | -0.72209000 | -3.64218300 | -1.00906200 |
| C | -4.02427400 | -4.37314200 | -0.66835900 |
| H | -5.44985900 | -3.17341200 | 0.41424700  |
| H | -2.37614300 | -5.34937100 | -1.66321100 |
| H | -4.74944000 | -5.13287400 | -0.94500400 |
| C | 0.35610300  | -2.31134000 | 1.40539300  |
| C | -0.01151200 | -2.94027800 | 2.60956000  |
| C | 1.60844200  | -2.60059300 | 0.84749100  |
| C | 0.86422800  | -3.81682500 | 3.24696300  |
| H | -0.98824300 | -2.75880000 | 3.04929100  |
| C | 2.48406500  | -3.48401900 | 1.48628900  |
| H | 1.90387300  | -2.13648200 | -0.08620700 |
| C | 2.11635800  | -4.08899900 | 2.68711700  |
| H | 0.56764100  | -4.29190200 | 4.17774900  |
| H | 3.45276300  | -3.69231900 | 1.04128100  |

|    |             |             |             |
|----|-------------|-------------|-------------|
| H  | 2.79682800  | -4.77402900 | 3.18483200  |
| C  | 1.58449500  | 1.19488800  | 1.85967600  |
| H  | 1.84926900  | 0.21952600  | 2.28193600  |
| H  | 2.30487500  | 1.92690600  | 2.23600200  |
| C  | -1.64125200 | -0.22263100 | 1.90335800  |
| H  | -2.28750500 | 0.51839200  | 1.42221100  |
| H  | -2.28206500 | -0.88302900 | 2.49567800  |
| C  | 0.19202100  | 1.62496400  | 2.34242000  |
| H  | -0.34805700 | 2.19546400  | 1.57401100  |
| C  | -0.70832300 | 0.49782600  | 2.87472200  |
| H  | -0.07948700 | -0.23371400 | 3.40465600  |
| O  | 0.36979700  | 2.42356700  | 3.51181200  |
| O  | -1.53844700 | 1.19010000  | 3.80254900  |
| C  | -0.78633700 | 2.28360900  | 4.35133800  |
| C  | -0.31187400 | 1.95777200  | 5.76421100  |
| H  | 0.32963600  | 2.75936300  | 6.14340600  |
| H  | -1.16834500 | 1.84536200  | 6.43589600  |
| H  | 0.26176600  | 1.02611200  | 5.76384800  |
| C  | -1.65573200 | 3.53553000  | 4.28322800  |
| H  | -2.57233300 | 3.39373700  | 4.86431800  |
| H  | -1.11336800 | 4.39620800  | 4.68602600  |
| H  | -1.93165100 | 3.74457200  | 3.24498100  |
| Ir | -0.03445500 | 0.20155800  | -1.22880800 |
| C  | -4.15728900 | 3.47709200  | -2.43854000 |
| C  | -3.17061000 | 3.48310400  | -1.45071100 |
| C  | -2.91182400 | 4.61279400  | -0.67155400 |
| C  | -3.67486400 | 5.75343000  | -0.91388700 |
| C  | -4.66286700 | 5.75368400  | -1.91167900 |
| C  | -4.91642100 | 4.61661900  | -2.68531800 |
| C  | -4.20152400 | 2.12013400  | -3.08075600 |
| H  | -2.14741900 | 4.59464300  | 0.09896800  |
| H  | -3.50773100 | 6.65129100  | -0.32687700 |
| H  | -5.24424100 | 6.65472800  | -2.08372900 |
| H  | -5.68628700 | 4.63055400  | -3.45148700 |
| H  | -5.17752200 | 1.63942500  | -2.98530400 |
| N  | -3.16149900 | 1.36052900  | -2.34099800 |
| C  | -2.51426100 | 2.16934000  | -1.42949900 |
| O  | -1.54576400 | 1.86176000  | -0.70565700 |
| H  | -3.95004700 | 2.14293500  | -4.14850300 |
| C  | -1.59148000 | -0.48579500 | -2.56340400 |
| C  | -2.86700400 | -0.00018600 | -2.63512600 |
| H  | -1.50128900 | -1.53490100 | -2.83115100 |
| C  | -4.02476600 | -0.82444400 | -3.06519600 |
| C  | -3.91077400 | -1.69542500 | -4.16237200 |

|   |             |             |             |
|---|-------------|-------------|-------------|
| C | -5.25501300 | -0.76887200 | -2.38179100 |
| C | -4.99078600 | -2.47770600 | -4.56892000 |
| H | -2.97491700 | -1.74588900 | -4.71049800 |
| C | -6.33348400 | -1.55072700 | -2.78916500 |
| H | -5.35521500 | -0.13064000 | -1.50772100 |
| C | -6.20732600 | -2.40494500 | -3.88786900 |
| H | -4.88433100 | -3.13603200 | -5.42630700 |
| H | -7.27216600 | -1.49809900 | -2.24477200 |
| H | -7.05062500 | -3.00903500 | -4.20944600 |
| C | 0.59196200  | 1.34448600  | -2.96860100 |
| C | -0.40099000 | 0.65449800  | -3.75113400 |
| H | 0.42292200  | 2.40653700  | -2.80130000 |
| H | 1.62991300  | 1.11447900  | -3.20405400 |
| H | -1.24144900 | 1.27035300  | -4.06018500 |
| C | 0.03143200  | -0.37699000 | -4.76682000 |
| H | 0.51173200  | 0.15517000  | -5.59950200 |
| H | 0.76389700  | -1.07026700 | -4.34379600 |
| H | -0.80508500 | -0.94926500 | -5.17533300 |
| H | 0.91664400  | -0.96238900 | -1.69425600 |

**INT7a**

|   |             |             |             |
|---|-------------|-------------|-------------|
| P | 1.87175800  | 1.43714600  | 0.02571600  |
| P | -1.49710300 | 0.57522000  | 1.00753800  |
| C | 3.36678300  | 1.18577100  | -1.02793600 |
| C | 3.72075900  | -0.12504200 | -1.39156700 |
| C | 4.14357800  | 2.25395200  | -1.49672500 |
| C | 4.83740500  | -0.36039100 | -2.19206100 |
| H | 3.12399300  | -0.96923200 | -1.05602000 |
| C | 5.25979800  | 2.01475800  | -2.30295600 |
| H | 3.88655000  | 3.27468400  | -1.23431700 |
| C | 5.61066900  | 0.71034100  | -2.64934100 |
| H | 5.10466600  | -1.37933000 | -2.45751500 |
| H | 5.85377700  | 2.85231700  | -2.65735400 |
| H | 6.48091200  | 0.52652400  | -3.27267600 |
| C | 2.04156200  | 3.14025100  | 0.70147200  |
| C | 3.17267900  | 3.51986600  | 1.44592900  |
| C | 1.02297000  | 4.08162000  | 0.49311500  |
| C | 3.27492300  | 4.80869600  | 1.96876900  |
| H | 3.98032300  | 2.81353700  | 1.61622900  |
| C | 1.12691600  | 5.37334700  | 1.01481000  |
| H | 0.14580500  | 3.81075700  | -0.08882100 |
| C | 2.25238800  | 5.73723000  | 1.75473800  |
| H | 4.15388500  | 5.08801200  | 2.54231300  |
| H | 0.33248000  | 6.09281500  | 0.83851300  |

|   |             |             |             |
|---|-------------|-------------|-------------|
| H | 2.33569700  | 6.74079200  | 2.16153300  |
| C | -2.99917400 | 1.65274100  | 0.98748200  |
| C | -2.83653900 | 3.03452200  | 1.19188800  |
| C | -4.28695800 | 1.15683800  | 0.73895500  |
| C | -3.93598600 | 3.89295900  | 1.16938700  |
| H | -1.85006800 | 3.44979500  | 1.38282500  |
| C | -5.38743800 | 2.01771000  | 0.72055600  |
| H | -4.43972400 | 0.09599500  | 0.57137400  |
| C | -5.21697300 | 3.38570500  | 0.93742600  |
| H | -3.79302700 | 4.95612100  | 1.34153000  |
| H | -6.37940200 | 1.61364900  | 0.53852400  |
| H | -6.07464400 | 4.05225800  | 0.93016200  |
| C | -2.12720000 | -1.14038900 | 1.25291300  |
| C | -3.00873900 | -1.44935600 | 2.30586000  |
| C | -1.66101500 | -2.18095000 | 0.43718300  |
| C | -3.40880800 | -2.76475300 | 2.53366000  |
| H | -3.39261800 | -0.66338700 | 2.94958600  |
| C | -2.05739500 | -3.50084600 | 0.67122600  |
| H | -0.98163100 | -1.96134600 | -0.37986200 |
| C | -2.92980100 | -3.79447100 | 1.71877900  |
| H | -4.08934600 | -2.98632900 | 3.35079400  |
| H | -1.68145100 | -4.29299100 | 0.03088600  |
| H | -3.23558900 | -4.82039600 | 1.90357900  |
| C | 2.33346600  | 0.33345400  | 1.46510400  |
| H | 2.12119400  | -0.70217100 | 1.17790800  |
| H | 3.42028200  | 0.41457200  | 1.56981700  |
| C | -0.85846700 | 0.95040300  | 2.72426300  |
| H | -0.60827700 | 2.01445000  | 2.79136300  |
| H | -1.67691500 | 0.77041200  | 3.42760100  |
| C | 1.72316400  | 0.64062400  | 2.83076400  |
| H | 1.72938300  | 1.72452200  | 3.01898600  |
| C | 0.32983200  | 0.09014100  | 3.14400400  |
| H | 0.23803900  | -0.92912100 | 2.73516800  |
| O | 2.52228400  | -0.02393500 | 3.80558300  |
| O | 0.36047800  | 0.03963700  | 4.56708500  |
| C | 1.71002800  | -0.24172100 | 4.97490500  |
| C | 1.85671300  | -1.70216100 | 5.38825700  |
| H | 2.90390700  | -1.92984700 | 5.61046700  |
| H | 1.25590000  | -1.90534800 | 6.27982800  |
| H | 1.52251800  | -2.35943600 | 4.57991800  |
| C | 2.08500900  | 0.74074800  | 6.07875400  |
| H | 1.40737800  | 0.62970800  | 6.93096900  |
| H | 3.10899200  | 0.55753700  | 6.41798200  |
| H | 2.01247200  | 1.76810900  | 5.70963300  |

|              |             |             |             |
|--------------|-------------|-------------|-------------|
| Ir           | -0.12104600 | 1.04352200  | -1.01601600 |
| C            | -4.48414900 | 0.05205800  | -4.40618500 |
| C            | -4.03308000 | 0.86888900  | -3.36600400 |
| C            | -4.79065300 | 1.93619600  | -2.88263100 |
| C            | -6.03272800 | 2.16448500  | -3.47375600 |
| C            | -6.49404200 | 1.34182200  | -4.51296700 |
| C            | -5.72617900 | 0.27493700  | -4.99111500 |
| C            | -3.43188700 | -0.97790000 | -4.70520600 |
| H            | -4.42194800 | 2.55902100  | -2.07514000 |
| H            | -6.65151300 | 2.98736600  | -3.12887300 |
| H            | -7.46514100 | 1.53957600  | -4.95749000 |
| H            | -6.09297100 | -0.35125700 | -5.79938200 |
| H            | -3.78041000 | -2.00759800 | -4.57288400 |
| N            | -2.36865200 | -0.66422600 | -3.72518000 |
| C            | -2.69828500 | 0.40814000  | -2.95053400 |
| O            | -2.02866700 | 0.94088100  | -2.03363500 |
| H            | -3.02572100 | -0.89000000 | -5.72040700 |
| C            | 0.02621900  | -0.60750200 | -3.94227500 |
| C            | -1.10132400 | -1.32866700 | -3.79191600 |
| H            | 0.96735000  | -1.15294700 | -3.91888900 |
| C            | -1.14413500 | -2.81166100 | -3.73265300 |
| C            | -0.21232400 | -3.58301100 | -4.44993200 |
| C            | -2.11974900 | -3.48112700 | -2.97302200 |
| C            | -0.23739200 | -4.97495700 | -4.38594000 |
| H            | 0.51911500  | -3.08757900 | -5.08154400 |
| C            | -2.15142200 | -4.87508600 | -2.91997200 |
| H            | -2.84606100 | -2.90615900 | -2.40557800 |
| C            | -1.20810400 | -5.62784200 | -3.62232800 |
| H            | 0.48988400  | -5.55144800 | -4.95052200 |
| H            | -2.91574700 | -5.37260700 | -2.32913700 |
| H            | -1.23616100 | -6.71292600 | -3.58520200 |
| C            | 0.12041400  | 0.87819400  | -4.10881000 |
| C            | 0.73664300  | 1.60374300  | -2.88968200 |
| H            | 0.76041100  | 1.08451700  | -4.98214200 |
| H            | -0.85947000 | 1.30147100  | -4.35245100 |
| H            | 1.80190300  | 1.36638500  | -2.89348100 |
| C            | 0.57546600  | 3.12284400  | -3.06457300 |
| H            | 0.89404600  | 3.44119500  | -4.06916000 |
| H            | -0.47200300 | 3.43961400  | -2.95414900 |
| H            | 1.17577100  | 3.69062100  | -2.34554500 |
| H            | 0.42230500  | -0.40134400 | -1.16706400 |
| <b>INT7b</b> |             |             |             |
| P            | -1.47023000 | -0.44398800 | 0.67174600  |

|   |             |             |             |
|---|-------------|-------------|-------------|
| P | 1.38502900  | -2.05319300 | -0.81655300 |
| C | -2.53705300 | 1.04142400  | 0.93963800  |
| C | -1.96344100 | 2.21153400  | 1.46524700  |
| C | -3.90119300 | 1.04649800  | 0.61241300  |
| C | -2.74237000 | 3.34825300  | 1.68038500  |
| H | -0.90541500 | 2.24161100  | 1.70895200  |
| C | -4.67652500 | 2.19128600  | 0.81757500  |
| H | -4.36909200 | 0.15020100  | 0.21815400  |
| C | -4.10148600 | 3.34218800  | 1.35618400  |
| H | -2.28739000 | 4.23856200  | 2.10576800  |
| H | -5.73422800 | 2.17489600  | 0.56907700  |
| H | -4.70732800 | 4.22744600  | 1.52667600  |
| C | -2.67974300 | -1.83604900 | 0.60328600  |
| C | -3.49304500 | -2.16283400 | 1.70418200  |
| C | -2.79685100 | -2.59418400 | -0.56935400 |
| C | -4.38416300 | -3.23277200 | 1.63429200  |
| H | -3.43815900 | -1.57972900 | 2.61901500  |
| C | -3.69409600 | -3.66408700 | -0.64109800 |
| H | -2.19375700 | -2.33953500 | -1.43500300 |
| C | -4.48355100 | -3.98830100 | 0.46188700  |
| H | -5.00110500 | -3.47684700 | 2.49437900  |
| H | -3.77856900 | -4.23363300 | -1.56197500 |
| H | -5.17768900 | -4.82232800 | 0.41043400  |
| C | 1.22082700  | -3.20632000 | -2.24806300 |
| C | 0.13289900  | -4.09117400 | -2.33344300 |
| C | 2.14782900  | -3.17303400 | -3.30428600 |
| C | -0.02050400 | -4.92337000 | -3.44425200 |
| H | -0.59840900 | -4.14577500 | -1.53412200 |
| C | 1.98966200  | -4.00399400 | -4.41462700 |
| H | 3.00766800  | -2.51335700 | -3.25290600 |
| C | 0.90533100  | -4.88105300 | -4.48798900 |
| H | -0.85997900 | -5.61161500 | -3.48693600 |
| H | 2.72150200  | -3.97237700 | -5.21681200 |
| H | 0.78849000  | -5.53324000 | -5.34869700 |
| C | 3.20799400  | -1.89449400 | -0.56499600 |
| C | 4.00834000  | -3.05150200 | -0.57955100 |
| C | 3.80983800  | -0.66135800 | -0.27606900 |
| C | 5.37491300  | -2.97236600 | -0.31704100 |
| H | 3.57052500  | -4.01950300 | -0.80630900 |
| C | 5.17900500  | -0.58507300 | -0.01013400 |
| H | 3.21065500  | 0.24208400  | -0.26745500 |
| C | 5.96347800  | -1.73803800 | -0.03071200 |
| H | 5.97877800  | -3.87499200 | -0.33459200 |
| H | 5.62944100  | 0.37851900  | 0.21013700  |

|    |             |             |             |
|----|-------------|-------------|-------------|
| H  | 7.02834000  | -1.67743700 | 0.17481000  |
| C  | -0.72697600 | -0.62025800 | 2.38369500  |
| H  | 0.04872600  | 0.14618000  | 2.48232000  |
| H  | -1.50073900 | -0.38928500 | 3.12288100  |
| C  | 0.93988300  | -3.12346300 | 0.63832500  |
| H  | -0.08803100 | -3.48501400 | 0.53578700  |
| H  | 1.59782300  | -3.99700200 | 0.60632000  |
| C  | -0.13738800 | -1.98602500 | 2.71959600  |
| H  | -0.90167900 | -2.76766600 | 2.59074300  |
| C  | 1.13790300  | -2.42506100 | 1.99092700  |
| H  | 1.82324900  | -1.56744500 | 1.90097400  |
| O  | 0.29835000  | -1.95188700 | 4.07393700  |
| O  | 1.67203900  | -3.37327300 | 2.90986600  |
| C  | 1.31374100  | -2.95862800 | 4.24015400  |
| C  | 2.50436400  | -2.31781700 | 4.94505500  |
| H  | 2.20041900  | -1.92516400 | 5.92037900  |
| H  | 3.29840500  | -3.05555500 | 5.09469300  |
| H  | 2.89813900  | -1.49150500 | 4.34572000  |
| C  | 0.75412600  | -4.17016900 | 4.97763900  |
| H  | 1.50454600  | -4.96548300 | 5.02491900  |
| H  | 0.46961500  | -3.89461600 | 5.99757500  |
| H  | -0.12714600 | -4.55543500 | 4.45624700  |
| Ir | 0.23367500  | -0.09875800 | -1.07900100 |
| C  | -2.65107700 | 3.74618300  | -3.57937800 |
| C  | -1.82657800 | 3.68729400  | -2.45182600 |
| C  | -1.53555500 | 4.81751000  | -1.68772300 |
| C  | -2.09951800 | 6.02835900  | -2.08649900 |
| C  | -2.93024400 | 6.09266300  | -3.21588300 |
| C  | -3.21712900 | 4.95333100  | -3.97517800 |
| C  | -2.75916000 | 2.37233700  | -4.18594200 |
| H  | -0.89258900 | 4.74598500  | -0.81695200 |
| H  | -1.89515100 | 6.93252500  | -1.52128600 |
| H  | -3.35792100 | 7.04741700  | -3.50773900 |
| H  | -3.86031900 | 5.01934900  | -4.84805700 |
| H  | -3.78631300 | 1.99490700  | -4.22088300 |
| N  | -1.93208800 | 1.55123100  | -3.27623700 |
| C  | -1.36930500 | 2.30257900  | -2.28076900 |
| O  | -0.61063000 | 1.89029200  | -1.37852700 |
| H  | -2.34843000 | 2.32314300  | -5.20221400 |
| C  | -0.36757500 | -0.23267700 | -3.71318800 |
| C  | -1.65533000 | 0.17298400  | -3.52928100 |
| H  | -0.20214700 | -1.29592100 | -3.87108000 |
| C  | -2.84597800 | -0.69645100 | -3.70532100 |
| C  | -2.80520100 | -1.79329000 | -4.58496400 |



|   |             |             |             |
|---|-------------|-------------|-------------|
| C | -4.05280300 | -0.41647900 | -3.03830100 |
| C | -3.92963100 | -2.59530500 | -4.77473500 |
| H | -1.89947000 | -2.00050600 | -5.14611300 |
| C | -5.17855600 | -1.21340800 | -3.23759100 |
| H | -4.10134200 | 0.41950600  | -2.34645900 |
| C | -5.12141600 | -2.30675000 | -4.10513700 |
| H | -3.88152800 | -3.43139500 | -5.46655800 |
| H | -6.10097100 | -0.98304100 | -2.71229000 |
| H | -6.00184400 | -2.92173900 | -4.26736100 |
| C | 1.65849200  | 0.52245700  | -2.54059900 |
| C | 0.85148200  | 0.66379700  | -3.84732200 |
| H | 2.48240400  | -0.18203500 | -2.68104600 |
| H | 2.09657800  | 1.47812500  | -2.23234900 |
| H | 1.13899300  | 0.43438500  | 0.07929900  |
| H | 0.50651100  | 1.69896700  | -3.94435400 |
| C | 1.64845000  | 0.31720200  | -5.11590900 |
| H | 2.53129800  | 0.96158800  | -5.19161700 |
| H | 1.99205100  | -0.72336800 | -5.09263300 |
| H | 1.04753100  | 0.45501300  | -6.02333400 |

**TS5a**

|   |             |             |             |
|---|-------------|-------------|-------------|
| P | 1.83860400  | 1.42443600  | 0.12550400  |
| P | -1.47269900 | 0.74304900  | 1.01131400  |
| C | 3.31944000  | 1.16158700  | -0.95160000 |
| C | 3.65114200  | -0.15074900 | -1.33282100 |
| C | 4.10413300  | 2.22286600  | -1.42345500 |
| C | 4.75174300  | -0.39338000 | -2.15379300 |
| H | 3.04742400  | -0.98889300 | -0.99433500 |
| C | 5.20317300  | 1.97678800  | -2.25185300 |
| H | 3.86759600  | 3.24413700  | -1.14405900 |
| C | 5.53119900  | 0.67118200  | -2.61570200 |
| H | 5.00233600  | -1.41355600 | -2.43089900 |
| H | 5.80252500  | 2.80978000  | -2.60823300 |
| H | 6.38879600  | 0.48161100  | -3.25473400 |
| C | 2.05209200  | 3.13307700  | 0.78699800  |
| C | 3.17495600  | 3.48954800  | 1.55535400  |
| C | 1.07787500  | 4.10707700  | 0.52193700  |
| C | 3.31101700  | 4.78626000  | 2.05043600  |
| H | 3.95161700  | 2.75969400  | 1.76624200  |
| C | 1.21648800  | 5.40675400  | 1.01665400  |
| H | 0.21520500  | 3.84097000  | -0.08250600 |
| C | 2.33132500  | 5.74691300  | 1.78338500  |
| H | 4.18282500  | 5.04687400  | 2.64358700  |
| H | 0.45625600  | 6.15163600  | 0.79857200  |

|   |             |             |             |
|---|-------------|-------------|-------------|
| H | 2.44064700  | 6.75627800  | 2.16941500  |
| C | -2.95977800 | 1.83878600  | 0.99629800  |
| C | -2.77239700 | 3.22048400  | 1.17620800  |
| C | -4.26174700 | 1.35103100  | 0.81750200  |
| C | -3.86357100 | 4.08863400  | 1.19734100  |
| H | -1.77315400 | 3.62625300  | 1.30916300  |
| C | -5.35398100 | 2.22279800  | 0.84505000  |
| H | -4.43212600 | 0.29100400  | 0.66455600  |
| C | -5.15939200 | 3.59093300  | 1.03655600  |
| H | -3.70238400 | 5.15261400  | 1.34607000  |
| H | -6.35743000 | 1.82645200  | 0.71691800  |
| H | -6.00990200 | 4.26608300  | 1.06329100  |
| C | -2.09556500 | -0.97990700 | 1.19358000  |
| C | -2.98025300 | -1.32609900 | 2.23141700  |
| C | -1.60762100 | -1.98935000 | 0.35082400  |
| C | -3.36910400 | -2.65213900 | 2.41572800  |
| H | -3.37284500 | -0.56448400 | 2.89869400  |
| C | -1.99228500 | -3.31885800 | 0.54453900  |
| H | -0.91418600 | -1.72692600 | -0.44356400 |
| C | -2.87244200 | -3.65155800 | 1.57465500  |
| H | -4.05281000 | -2.90526000 | 3.22088700  |
| H | -1.59803700 | -4.09025100 | -0.11021100 |
| H | -3.16801900 | -4.68574500 | 1.72754900  |
| C | 2.33345200  | 0.33549800  | 1.56899700  |
| H | 2.13104100  | -0.70317700 | 1.28703100  |
| H | 3.41934600  | 0.43081400  | 1.67239200  |
| C | -0.84466700 | 1.07973600  | 2.73560800  |
| H | -0.54776500 | 2.13082900  | 2.81536700  |
| H | -1.69360800 | 0.93682400  | 3.41122500  |
| C | 1.71086600  | 0.64360700  | 2.92592200  |
| H | 1.76485500  | 1.72250000  | 3.13458700  |
| C | 0.28515000  | 0.15772200  | 3.18630900  |
| H | 0.15861000  | -0.85061700 | 2.76178500  |
| O | 2.44445900  | -0.07687600 | 3.91210000  |
| O | 0.26480600  | 0.08940700  | 4.60899600  |
| C | 1.58828800  | -0.25769800 | 5.05543700  |
| C | 1.65095200  | -1.72476700 | 5.46623400  |
| H | 2.67856600  | -2.00353400 | 5.71953400  |
| H | 1.01359600  | -1.90152400 | 6.33784400  |
| H | 1.31089900  | -2.36208600 | 4.64451300  |
| C | 1.97662600  | 0.70169100  | 6.17498500  |
| H | 1.26817800  | 0.62198500  | 7.00539100  |
| H | 2.97919900  | 0.46645300  | 6.54469300  |
| H | 1.96714100  | 1.73265400  | 5.80889900  |

|             |             |             |             |
|-------------|-------------|-------------|-------------|
| Ir          | -0.12041800 | 1.02328200  | -0.93468300 |
| C           | -4.52433300 | -0.11308600 | -4.32627400 |
| C           | -4.06097200 | 0.68250700  | -3.27598700 |
| C           | -4.83137200 | 1.71260000  | -2.73576600 |
| C           | -6.10053900 | 1.92032200  | -3.27478900 |
| C           | -6.57529200 | 1.11498500  | -4.32137200 |
| C           | -5.79278500 | 0.08857200  | -4.86025700 |
| C           | -3.45206100 | -1.09610400 | -4.70026200 |
| H           | -4.45054700 | 2.32438200  | -1.92595200 |
| H           | -6.72953700 | 2.71421600  | -2.88345300 |
| H           | -7.56752300 | 1.29552100  | -4.72468500 |
| H           | -6.16874800 | -0.52307100 | -5.67546800 |
| H           | -3.75952900 | -2.14068200 | -4.58230900 |
| N           | -2.35780400 | -0.77290700 | -3.75825800 |
| C           | -2.69547700 | 0.25577500  | -2.91918000 |
| O           | -2.01719400 | 0.77180900  | -2.00578000 |
| H           | -3.09669400 | -0.96662600 | -5.73005100 |
| C           | 0.02577100  | -0.66232200 | -4.10368800 |
| C           | -1.08215500 | -1.40263100 | -3.90989000 |
| H           | 0.97244100  | -1.19583800 | -4.15754400 |
| C           | -1.08927000 | -2.88779800 | -3.89584700 |
| C           | -0.19711500 | -3.61664200 | -4.70140800 |
| C           | -1.99103900 | -3.59817100 | -3.08421100 |
| C           | -0.18710700 | -5.01015800 | -4.67381700 |
| H           | 0.47448600  | -3.08802900 | -5.37154000 |
| C           | -1.98559200 | -4.99298800 | -3.06434600 |
| H           | -2.68669200 | -3.05386800 | -2.45185300 |
| C           | -1.08120800 | -5.70458100 | -3.85577300 |
| H           | 0.50755600  | -5.55466100 | -5.30697000 |
| H           | -2.69075000 | -5.52426800 | -2.43089200 |
| H           | -1.08114600 | -6.79056800 | -3.84434100 |
| C           | 0.09270800  | 0.83082800  | -4.21000400 |
| C           | 0.79559300  | 1.50782800  | -3.01322000 |
| H           | 0.66530800  | 1.09631400  | -5.11182800 |
| H           | -0.90408100 | 1.25789500  | -4.34703700 |
| H           | 1.87089700  | 1.32797500  | -3.09351400 |
| C           | 0.57093500  | 3.02558300  | -3.04135300 |
| H           | 0.86363800  | 3.40186200  | -4.03465500 |
| H           | -0.47906800 | 3.29362400  | -2.88477200 |
| H           | 1.17881900  | 3.55258300  | -2.30278000 |
| H           | 0.78981100  | 0.31859100  | -2.06640600 |
| <b>TS5b</b> |             |             |             |
| P           | -1.24993500 | -0.38545800 | 0.74069500  |

|   |             |             |             |
|---|-------------|-------------|-------------|
| P | 1.49657600  | -2.04680300 | -0.67247500 |
| C | -2.19321600 | 1.17186400  | 1.05164100  |
| C | -1.54486100 | 2.26503200  | 1.64935600  |
| C | -3.54808900 | 1.28980700  | 0.71035900  |
| C | -2.24590100 | 3.43965200  | 1.92292500  |
| H | -0.49181900 | 2.20555700  | 1.90935300  |
| C | -4.24438500 | 2.47176800  | 0.97553800  |
| H | -4.07059600 | 0.45294900  | 0.25757000  |
| C | -3.59803400 | 3.54586500  | 1.58741500  |
| H | -1.73601300 | 4.26997500  | 2.40379700  |
| H | -5.29657300 | 2.54523300  | 0.71485800  |
| H | -4.14393900 | 4.45928000  | 1.80521700  |
| C | -2.55560100 | -1.67970700 | 0.63946900  |
| C | -3.39912600 | -1.97518400 | 1.72562600  |
| C | -2.72103700 | -2.38618700 | -0.56007600 |
| C | -4.37229300 | -2.96699400 | 1.61304700  |
| H | -3.30359500 | -1.42919400 | 2.65999200  |
| C | -3.70308400 | -3.37427800 | -0.67499100 |
| H | -2.08399300 | -2.15271900 | -1.40898500 |
| C | -4.52419700 | -3.66943300 | 0.41323600  |
| H | -5.01371200 | -3.19075700 | 2.46061600  |
| H | -3.82921800 | -3.90122700 | -1.61611600 |
| H | -5.28468600 | -4.44054100 | 0.32905800  |
| C | 1.45362400  | -3.21759400 | -2.10694300 |
| C | 0.30249000  | -3.99811700 | -2.31240900 |
| C | 2.49518900  | -3.29973200 | -3.04546300 |
| C | 0.20098700  | -4.84167400 | -3.41923400 |
| H | -0.52433400 | -3.95490600 | -1.60996600 |
| C | 2.38923200  | -4.14137300 | -4.15566900 |
| H | 3.40174700  | -2.71914000 | -2.90886600 |
| C | 1.24341700  | -4.91447000 | -4.34597600 |
| H | -0.69223800 | -5.44519100 | -3.55433400 |
| H | 3.20911600  | -4.19578700 | -4.86634000 |
| H | 1.16482100  | -5.57301000 | -5.20615500 |
| C | 3.28783400  | -1.74791200 | -0.33842300 |
| C | 4.20119700  | -2.81816300 | -0.32789500 |
| C | 3.74696500  | -0.46676300 | 0.00297600  |
| C | 5.54100600  | -2.60409300 | -0.00711300 |
| H | 3.87285900  | -3.82252500 | -0.57935100 |
| C | 5.08932700  | -0.25485900 | 0.32629500  |
| H | 3.04668200  | 0.36236600  | 0.03165500  |
| C | 5.98875300  | -1.32097300 | 0.31763500  |
| H | 6.23431000  | -3.44021900 | -0.00873300 |
| H | 5.42795800  | 0.74354600  | 0.58812700  |

|    |             |             |             |
|----|-------------|-------------|-------------|
| H  | 7.03284700  | -1.15625300 | 0.56779000  |
| C  | -0.49441400 | -0.64198000 | 2.43343000  |
| H  | 0.35427300  | 0.04291300  | 2.52720100  |
| H  | -1.24170700 | -0.33118800 | 3.17100600  |
| C  | 1.07964900  | -3.20000900 | 0.73042200  |
| H  | 0.07326500  | -3.60728600 | 0.58848300  |
| H  | 1.78041300  | -4.03721300 | 0.65347700  |
| C  | -0.05471600 | -2.06069800 | 2.77087300  |
| H  | -0.87032300 | -2.77045200 | 2.56643300  |
| C  | 1.22726000  | -2.58143800 | 2.12035500  |
| H  | 1.98760400  | -1.78472100 | 2.11909500  |
| O  | 0.28549500  | -2.09916800 | 4.15239200  |
| O  | 1.60532000  | -3.60731600 | 3.03334800  |
| C  | 1.19224400  | -3.20157600 | 4.35087100  |
| C  | 2.38258500  | -2.69543600 | 5.15811000  |
| H  | 2.04661100  | -2.30311500 | 6.12302900  |
| H  | 3.09215900  | -3.50882100 | 5.33733800  |
| H  | 2.89408400  | -1.89381700 | 4.61697700  |
| C  | 0.47372500  | -4.37698300 | 5.00367100  |
| H  | 1.14315800  | -5.24025900 | 5.07051100  |
| H  | 0.14586800  | -4.10777700 | 6.01221900  |
| H  | -0.40094600 | -4.66164100 | 4.41116600  |
| Ir | 0.23918800  | -0.20245200 | -1.10495600 |
| C  | -2.88821600 | 3.67653300  | -3.59413500 |
| C  | -2.03628700 | 3.52087400  | -2.49730400 |
| C  | -1.71694900 | 4.58382200  | -1.65272400 |
| C  | -2.28251900 | 5.82621700  | -1.93636200 |
| C  | -3.14256000 | 5.98706400  | -3.03354300 |
| C  | -3.45714600 | 4.91442600  | -3.87462500 |
| C  | -3.01333000 | 2.35783500  | -4.30743300 |
| H  | -1.05620200 | 4.43679900  | -0.80527400 |
| H  | -2.05649900 | 6.68025300  | -1.30505200 |
| H  | -3.57079400 | 6.96464000  | -3.23534700 |
| H  | -4.12206600 | 5.05407700  | -4.72225600 |
| H  | -4.04073000 | 1.97961300  | -4.34264700 |
| N  | -2.16078300 | 1.46382000  | -3.49718800 |
| C  | -1.57961900 | 2.12260200  | -2.44940900 |
| O  | -0.79694900 | 1.65943800  | -1.59246800 |
| H  | -2.63452700 | 2.39248300  | -5.33656700 |
| C  | -0.64425000 | -0.31653300 | -4.05152900 |
| C  | -1.91348100 | 0.10950500  | -3.87725500 |
| H  | -0.49503800 | -1.37641600 | -4.24783100 |
| C  | -3.11375000 | -0.74613100 | -4.04986600 |
| C  | -3.12425100 | -1.78019300 | -5.00286900 |

|   |             |             |             |
|---|-------------|-------------|-------------|
| C | -4.27153600 | -0.53616700 | -3.27910300 |
| C | -4.24618300 | -2.59187100 | -5.16224200 |
| H | -2.25762200 | -1.92861000 | -5.64018400 |
| C | -5.39676900 | -1.34256400 | -3.44634900 |
| H | -4.28224600 | 0.25430800  | -2.53341400 |
| C | -5.38831000 | -2.37520800 | -4.38670200 |
| H | -4.23703700 | -3.37986100 | -5.91005200 |
| H | -6.28003400 | -1.16612200 | -2.83897600 |
| H | -6.26804100 | -2.99741600 | -4.52344500 |
| C | 1.55960600  | 0.21245200  | -2.92851100 |
| C | 0.59757800  | 0.54085800  | -4.08433300 |
| H | 2.04830500  | -0.74613900 | -3.09581700 |
| H | 2.36127200  | 0.96347200  | -2.93180500 |
| H | 1.57956800  | 0.61929400  | -1.43110500 |
| H | 0.31111700  | 1.59356700  | -4.01045500 |
| C | 1.32504400  | 0.35432100  | -5.43488800 |
| H | 2.22369900  | 0.97993600  | -5.47871900 |
| H | 1.63119700  | -0.68881400 | -5.57655400 |
| H | 0.67529000  | 0.63399200  | -6.27217300 |

**4a**

|   |             |             |             |
|---|-------------|-------------|-------------|
| C | -1.85738100 | 3.20441700  | -0.63701700 |
| C | -1.96804100 | 1.81528200  | -0.68280100 |
| C | -1.31903000 | 0.99430700  | 0.23585500  |
| C | -0.53951500 | 1.60459900  | 1.21944400  |
| C | -0.42214500 | 3.00159200  | 1.26897400  |
| C | -1.07941700 | 3.81721600  | 0.34147800  |
| C | -2.67666000 | 3.80000900  | -1.75498900 |
| H | -1.42675200 | -0.08453300 | 0.17410700  |
| H | -0.01782200 | 0.99687800  | 1.95355800  |
| H | 0.18949200  | 3.45870200  | 2.04230000  |
| H | -0.98128200 | 4.89877900  | 0.39192700  |
| H | -3.47472700 | 4.45826000  | -1.38781300 |
| N | -3.23535200 | 2.61713800  | -2.42040500 |
| C | -2.85155600 | 1.42078900  | -1.81306900 |
| O | -3.18397400 | 0.29366900  | -2.14472400 |
| H | -2.06556400 | 4.38303200  | -2.45802700 |
| C | -3.93113000 | 2.15994900  | -4.69665500 |
| C | -4.16041900 | 2.73087900  | -3.49930200 |
| C | -2.70445400 | 1.42690700  | -5.16810300 |
| H | -1.94005300 | 1.46843600  | -4.38477100 |
| C | -3.03133200 | -0.05451900 | -5.44021800 |
| C | -2.14132300 | 2.10969300  | -6.43113500 |
| H | -2.13923200 | -0.58537800 | -5.79470800 |

|   |             |             |             |
|---|-------------|-------------|-------------|
| H | -3.38581300 | -0.53620200 | -4.52593200 |
| H | -3.80543000 | -0.14914500 | -6.21301500 |
| H | -1.24622300 | 1.58453300  | -6.78513500 |
| H | -2.87703800 | 2.09899000  | -7.24572400 |
| H | -1.87010600 | 3.15388500  | -6.23753000 |
| H | -4.73966500 | 2.22138000  | -5.42523000 |
| C | -5.40908500 | 3.48718300  | -3.20397100 |
| C | -6.01307900 | 4.29928900  | -4.17868400 |
| C | -6.01827800 | 3.39986700  | -1.93998000 |
| C | -7.20070400 | 4.97837100  | -3.90914100 |
| H | -5.53476600 | 4.40962800  | -5.14785800 |
| C | -7.20301800 | 4.08330200  | -1.66872200 |
| H | -5.56831700 | 2.77288200  | -1.17518000 |
| C | -7.80133900 | 4.87369500  | -2.65267000 |
| H | -7.64985400 | 5.60195900  | -4.67780000 |
| H | -7.66316600 | 3.99280100  | -0.68816900 |
| H | -8.72304700 | 5.40845800  | -2.43995700 |

**5a**

|   |             |             |             |
|---|-------------|-------------|-------------|
| C | -1.85195700 | 3.22263500  | -0.60193600 |
| C | -1.92746800 | 1.83056400  | -0.62983700 |
| C | -1.23186100 | 1.03762800  | 0.27936100  |
| C | -0.44135700 | 1.67910700  | 1.23393800  |
| C | -0.35974700 | 3.07912600  | 1.26549500  |
| C | -1.06439000 | 3.86655600  | 0.34840400  |
| C | -2.71478500 | 3.78581500  | -1.70415300 |
| H | -1.31291700 | -0.04430300 | 0.23240000  |
| H | 0.11665200  | 1.09348500  | 1.95927400  |
| H | 0.26110600  | 3.56089800  | 2.01617400  |
| H | -0.99362900 | 4.95084600  | 0.38454800  |
| H | -3.51546100 | 4.43298600  | -1.32405100 |
| N | -3.26482800 | 2.58171000  | -2.33873200 |
| C | -2.83114100 | 1.40035100  | -1.73073900 |
| O | -3.14658500 | 0.26388100  | -2.04390000 |
| H | -2.13503200 | 4.37170300  | -2.43084300 |
| C | -3.96681600 | 1.98181100  | -4.57057300 |
| C | -4.18648800 | 2.64678400  | -3.41969800 |
| H | -4.77682400 | 1.98970100  | -5.29854000 |
| C | -5.42002300 | 3.44439900  | -3.18145200 |
| C | -5.99679700 | 4.20874300  | -4.20955800 |
| C | -6.04429900 | 3.44321100  | -1.92173700 |
| C | -7.17276800 | 4.92647200  | -3.99403800 |
| H | -5.50570000 | 4.25004300  | -5.17774600 |
| C | -7.21660000 | 4.16613900  | -1.70446700 |

|   |             |             |             |
|---|-------------|-------------|-------------|
| H | -5.61635900 | 2.85060900  | -1.11769400 |
| C | -7.78775000 | 4.90920900  | -2.74025900 |
| H | -7.60153500 | 5.51191400  | -4.80327500 |
| H | -7.68899700 | 4.14284200  | -0.72583700 |
| H | -8.69999000 | 5.47454000  | -2.57001100 |
| C | -2.74365800 | 1.20197000  | -4.95368800 |
| C | -2.40732600 | 1.32513700  | -6.45031200 |
| H | -2.89621700 | 0.14356700  | -4.69648600 |
| H | -1.88658000 | 1.52841400  | -4.35132500 |
| C | -1.17234200 | 0.51048900  | -6.84715300 |
| H | -3.27125600 | 0.99395900  | -7.04392600 |
| H | -2.24986800 | 2.38272200  | -6.70374300 |
| H | -0.95766000 | 0.60637800  | -7.91764700 |
| H | -0.28367800 | 0.84426300  | -6.29735800 |
| H | -1.31507600 | -0.55460800 | -6.62752800 |

**TS1a**

|   |             |             |             |
|---|-------------|-------------|-------------|
| P | -1.00089500 | 1.77845700  | 1.50137600  |
| P | 2.50969500  | 1.42594300  | 1.82444300  |
| C | -2.54953600 | 1.73573100  | 0.49564400  |
| C | -3.80818400 | 1.46199900  | 1.05024900  |
| C | -2.45613500 | 2.01916300  | -0.87806900 |
| C | -4.95035600 | 1.47073200  | 0.24427000  |
| H | -3.90467000 | 1.23931800  | 2.10769300  |
| C | -3.59872600 | 2.03362700  | -1.67703800 |
| H | -1.48842900 | 2.22669700  | -1.32803200 |
| C | -4.84896400 | 1.75703900  | -1.11732000 |
| H | -5.91901500 | 1.25423900  | 0.68575700  |
| H | -3.51255300 | 2.25942700  | -2.73605000 |
| H | -5.73848000 | 1.76562700  | -1.74049000 |
| C | -1.51791600 | 1.46396500  | 3.23568400  |
| C | -2.28485200 | 2.39011900  | 3.96565800  |
| C | -1.14271800 | 0.25745800  | 3.84782300  |
| C | -2.66177300 | 2.11339200  | 5.27986400  |
| H | -2.59586300 | 3.32739400  | 3.51302300  |
| C | -1.52367500 | -0.01699400 | 5.16346000  |
| H | -0.55330200 | -0.46280700 | 3.28660500  |
| C | -2.28069700 | 0.91044400  | 5.88085800  |
| H | -3.25241100 | 2.83712700  | 5.83397800  |
| H | -1.22989700 | -0.95558800 | 5.62474700  |
| H | -2.57573100 | 0.69820900  | 6.90446600  |
| C | 3.23925100  | 0.11602000  | 2.89224100  |
| C | 2.75284600  | -0.08499500 | 4.19528100  |
| C | 4.23085900  | -0.74454000 | 2.39338100  |



|    |             |             |             |
|----|-------------|-------------|-------------|
| C  | 3.26674300  | -1.10963600 | 4.99060900  |
| H  | 1.96796000  | 0.54713400  | 4.59914900  |
| C  | 4.73931200  | -1.76915400 | 3.19317300  |
| H  | 4.60342300  | -0.61895800 | 1.38318200  |
| C  | 4.26268200  | -1.95197000 | 4.49286800  |
| H  | 2.88977000  | -1.24594700 | 6.00024000  |
| H  | 5.51027300  | -2.42403500 | 2.79726800  |
| H  | 4.66542900  | -2.74602200 | 5.11517000  |
| C  | 3.81460100  | 1.94750400  | 0.64654800  |
| C  | 5.10961000  | 2.25205200  | 1.09974300  |
| C  | 3.50603800  | 2.10816400  | -0.71232300 |
| C  | 6.07731500  | 2.70636300  | 0.20489400  |
| H  | 5.36989200  | 2.12662900  | 2.14727800  |
| C  | 4.47717200  | 2.56824400  | -1.60387600 |
| H  | 2.50675800  | 1.86891000  | -1.06493400 |
| C  | 5.76167400  | 2.86673700  | -1.14720400 |
| H  | 7.07618600  | 2.93730700  | 0.56349800  |
| H  | 4.22851200  | 2.69302200  | -2.65395200 |
| H  | 6.51664100  | 3.22465900  | -1.84141100 |
| C  | -0.66771800 | 3.61771200  | 1.41528700  |
| H  | -0.28201100 | 3.81717800  | 0.40958900  |
| H  | -1.64224500 | 4.11359700  | 1.47940400  |
| C  | 2.38777700  | 2.88723400  | 2.96316900  |
| H  | 1.83621800  | 2.61034000  | 3.86697200  |
| H  | 3.40802100  | 3.13992500  | 3.26947600  |
| C  | 0.23679400  | 4.25747700  | 2.46583900  |
| H  | -0.04908000 | 3.91847100  | 3.47342000  |
| C  | 1.75626500  | 4.11739500  | 2.31356400  |
| H  | 2.03257700  | 4.18662800  | 1.24879800  |
| O  | 0.06065000  | 5.66668200  | 2.35927700  |
| O  | 2.22002200  | 5.26499400  | 3.01453400  |
| C  | 1.24802800  | 6.31230900  | 2.85618100  |
| C  | 1.70957800  | 7.32487900  | 1.81344700  |
| H  | 0.92638800  | 8.06801900  | 1.63419200  |
| H  | 2.61083100  | 7.84007200  | 2.15893600  |
| H  | 1.93167000  | 6.82097900  | 0.86795200  |
| C  | 0.99025900  | 6.92865800  | 4.22620200  |
| H  | 1.91604400  | 7.34645600  | 4.63378100  |
| H  | 0.24850500  | 7.72907300  | 4.14782400  |
| H  | 0.61858500  | 6.16742000  | 4.91853600  |
| Ir | 0.63494300  | 0.41757200  | 0.71810800  |
| C  | 0.00206100  | -3.50871400 | -0.69648100 |
| C  | 0.32071100  | -2.19876800 | -0.37809700 |
| C  | -0.56015100 | -1.19072100 | 0.03463100  |

|   |             |             |             |
|---|-------------|-------------|-------------|
| C | -1.90570700 | -1.59343500 | 0.07846900  |
| C | -2.26220900 | -2.91906800 | -0.23409300 |
| C | -1.33408700 | -3.89681500 | -0.62636600 |
| C | 1.29539300  | -4.21294100 | -1.04802800 |
| H | -0.30208400 | 0.14639100  | -0.60780000 |
| H | -2.68924000 | -0.89445600 | 0.34637500  |
| H | -3.31169100 | -3.19469700 | -0.17480800 |
| H | -1.66270500 | -4.90330400 | -0.86694100 |
| H | 1.50696200  | -5.07950500 | -0.41433500 |
| N | 2.32923200  | -3.15813500 | -0.83024500 |
| C | 1.74263000  | -1.99538900 | -0.44732500 |
| O | 2.26613100  | -0.88796300 | -0.14702600 |
| H | 1.32858800  | -4.54308500 | -2.09328800 |
| C | 4.43567900  | -2.46580900 | -1.74638200 |
| C | 3.72270000  | -3.37495500 | -1.06557300 |
| H | 5.50795800  | -2.58322400 | -1.85450900 |
| C | 4.29715800  | -4.61918700 | -0.49272300 |
| C | 3.93948300  | -5.05161200 | 0.79636700  |
| C | 5.23148700  | -5.36948900 | -1.22394100 |
| C | 4.51191800  | -6.20007000 | 1.34170300  |
| H | 3.23132400  | -4.47000400 | 1.38138100  |
| C | 5.80500800  | -6.51610000 | -0.67496300 |
| C | 5.44620900  | -6.93548300 | 0.60776400  |
| H | 4.23237000  | -6.51893000 | 2.34196200  |
| H | 6.52316500  | -7.08875800 | -1.25468200 |
| H | 5.88804600  | -7.83257400 | 1.03163700  |
| H | 3.98015700  | -1.58144100 | -2.17641300 |
| H | 5.49204200  | -5.05985900 | -2.23192300 |

**TS1b**

|   |             |             |             |
|---|-------------|-------------|-------------|
| P | -0.78090000 | 1.58069500  | -0.34117700 |
| P | 1.08979400  | -1.18281000 | 0.64053800  |
| C | -1.93883500 | 2.42111400  | -1.51172300 |
| C | -3.15156100 | 2.98205000  | -1.08957500 |
| C | -1.57938900 | 2.51907200  | -2.86697900 |
| C | -3.97946100 | 3.64413000  | -2.00044800 |
| H | -3.44962300 | 2.91715300  | -0.04844600 |
| C | -2.40574800 | 3.18501900  | -3.77206100 |
| H | -0.65194300 | 2.07655100  | -3.22047400 |
| C | -3.60724900 | 3.75287700  | -3.34012300 |
| H | -4.91232700 | 4.08174600  | -1.65626000 |
| H | -2.10604400 | 3.26967500  | -4.81323100 |
| H | -4.24691700 | 4.27752200  | -4.04394700 |
| C | -1.35452500 | 2.10420200  | 1.32625900  |

|   |             |             |             |
|---|-------------|-------------|-------------|
| C | -1.30745700 | 3.44696800  | 1.74370700  |
| C | -1.87085300 | 1.13835500  | 2.20216200  |
| C | -1.75798300 | 3.80716000  | 3.01289200  |
| H | -0.92849000 | 4.21697000  | 1.07765400  |
| C | -2.32543100 | 1.50188000  | 3.47225600  |
| H | -1.91196000 | 0.09852500  | 1.89239700  |
| C | -2.26614400 | 2.83465400  | 3.87975000  |
| H | -1.71330100 | 4.84650300  | 3.32532200  |
| H | -2.71988700 | 0.74175500  | 4.14035600  |
| H | -2.61500600 | 3.11828900  | 4.86855500  |
| C | 0.35985400  | -2.00964700 | 2.12509000  |
| C | 1.04731300  | -2.07260600 | 3.35084500  |
| C | -0.93025700 | -2.56205900 | 2.05009300  |
| C | 0.46336400  | -2.68055600 | 4.46299800  |
| H | 2.04202200  | -1.65046300 | 3.44998500  |
| C | -1.51368300 | -3.16723300 | 3.16499600  |
| H | -1.47965800 | -2.51380500 | 1.11424000  |
| C | -0.81743800 | -3.22983700 | 4.37286600  |
| H | 1.01069300  | -2.72216400 | 5.40030300  |
| H | -2.51157300 | -3.58937900 | 3.08664200  |
| H | -1.26969800 | -3.70177300 | 5.24040100  |
| C | 2.46216600  | -2.27472900 | 0.05231900  |
| C | 2.94534200  | -3.34690200 | 0.81728600  |
| C | 3.08025100  | -1.98675000 | -1.17617500 |
| C | 4.02315900  | -4.11069300 | 0.36420300  |
| H | 2.47851000  | -3.59929000 | 1.76337000  |
| C | 4.16294700  | -2.74518200 | -1.62120200 |
| H | 2.71137800  | -1.17244300 | -1.79381800 |
| C | 4.63619800  | -3.81054500 | -0.85246500 |
| H | 4.38009500  | -4.94257000 | 0.96472000  |
| H | 4.63286600  | -2.50645500 | -2.57109100 |
| H | 5.47528500  | -4.40486500 | -1.20231700 |
| C | 0.74846600  | 2.60754300  | -0.66184600 |
| H | 1.13986900  | 2.29628400  | -1.63544000 |
| H | 0.43093700  | 3.65079400  | -0.76189900 |
| C | 2.05765900  | 0.19372400  | 1.44648600  |
| H | 1.42110000  | 0.66807000  | 2.20152800  |
| H | 2.89125600  | -0.28125200 | 1.97195400  |
| C | 1.85756800  | 2.54251400  | 0.37778400  |
| H | 1.46184200  | 2.80871800  | 1.37015800  |
| C | 2.64804800  | 1.23673700  | 0.49780300  |
| H | 2.82295900  | 0.81620900  | -0.50455300 |
| O | 2.86850500  | 3.46589400  | -0.00866500 |
| O | 3.87572200  | 1.69844900  | 1.05205700  |

|                            |             |             |             |
|----------------------------|-------------|-------------|-------------|
| C                          | 4.10867900  | 3.03950100  | 0.58474000  |
| C                          | 5.18094600  | 3.05323600  | -0.49916800 |
| H                          | 5.29267900  | 4.06192800  | -0.90889600 |
| H                          | 6.14188800  | 2.73326700  | -0.08536000 |
| H                          | 4.90431700  | 2.37669200  | -1.31333000 |
| C                          | 4.45581600  | 3.90650100  | 1.78998800  |
| H                          | 5.35193600  | 3.52221500  | 2.28696400  |
| H                          | 4.64353800  | 4.93709500  | 1.47423700  |
| H                          | 3.63131000  | 3.90108900  | 2.50914200  |
| Ir                         | -0.54739500 | -0.74229600 | -0.88787300 |
| C                          | -4.60499700 | -0.45579100 | -4.62289700 |
| C                          | -4.42120300 | -0.29119900 | -3.24624800 |
| C                          | -5.45706300 | 0.11451900  | -2.40536600 |
| C                          | -6.70371200 | 0.34874600  | -2.98377500 |
| C                          | -6.89267000 | 0.18895400  | -4.36521800 |
| C                          | -5.84521600 | -0.21036000 | -5.20216100 |
| C                          | -3.30444700 | -0.89603000 | -5.24319800 |
| H                          | -5.28973600 | 0.23985100  | -1.34075100 |
| H                          | -7.53871500 | 0.65832900  | -2.36263500 |
| H                          | -7.87302700 | 0.37707800  | -4.79323100 |
| H                          | -6.00689300 | -0.32930500 | -6.26976700 |
| H                          | -3.36730600 | -1.87782900 | -5.72706400 |
| N                          | -2.40045200 | -0.96975200 | -4.07970000 |
| C                          | -3.02270100 | -0.60542900 | -2.92871100 |
| O                          | -2.49257400 | -0.52156000 | -1.79783600 |
| H                          | -2.92498500 | -0.17945700 | -5.98161900 |
| C                          | -0.22216300 | -1.21696200 | -5.05531500 |
| C                          | -1.11342500 | -1.59300400 | -4.13226100 |
| H                          | 0.45810500  | -1.48311900 | -1.92923600 |
| H                          | 0.71559200  | -1.75082300 | -5.16198800 |
| C                          | -0.92654200 | -2.77628600 | -3.22988400 |
| C                          | -1.17857600 | -4.03998500 | -3.78391900 |
| C                          | -0.49067700 | -2.65579200 | -1.88678300 |
| C                          | -0.99201100 | -5.20090900 | -3.03621000 |
| H                          | -1.50614900 | -4.10986600 | -4.81776200 |
| C                          | -0.25418600 | -3.84709100 | -1.17492300 |
| C                          | -0.52228700 | -5.09900600 | -1.72757900 |
| H                          | -1.18712800 | -6.17253600 | -3.48042200 |
| H                          | 0.13415300  | -3.81066400 | -0.16520600 |
| H                          | -0.35288100 | -5.99434400 | -1.13574000 |
| H                          | -0.40386700 | -0.38506500 | -5.72943800 |
| [Rh(cod)DIOP] <sup>+</sup> |             |             |             |
| P                          | -0.42075500 | 1.70675900  | -0.19854600 |

|   |             |             |             |
|---|-------------|-------------|-------------|
| P | 1.48379600  | -1.21986700 | 0.42119700  |
| C | -1.67216400 | 2.78145200  | -1.03989300 |
| C | -3.03786400 | 2.60546700  | -0.75933300 |
| C | -1.29605100 | 3.75293500  | -1.98281400 |
| C | -4.00063200 | 3.38345000  | -1.40355900 |
| H | -3.35284900 | 1.87669900  | -0.01775800 |
| C | -2.26243800 | 4.53222300  | -2.62284000 |
| H | -0.24944300 | 3.91934800  | -2.22022200 |
| C | -3.61583700 | 4.34830300  | -2.33681500 |
| H | -5.05129100 | 3.24057000  | -1.16787900 |
| H | -1.95336700 | 5.28609200  | -3.34117800 |
| H | -4.36572100 | 4.95674100  | -2.83359200 |
| C | -1.08094700 | 1.65608100  | 1.51962500  |
| C | -1.07868900 | 2.80135400  | 2.33671800  |
| C | -1.67078000 | 0.47934900  | 2.00028000  |
| C | -1.63341200 | 2.75539700  | 3.61448900  |
| H | -0.65661300 | 3.73505000  | 1.97629000  |
| C | -2.23211400 | 0.43717300  | 3.27948600  |
| H | -1.68943300 | -0.40741700 | 1.37642900  |
| C | -2.20891800 | 1.57239200  | 4.08910200  |
| H | -1.62195900 | 3.64457000  | 4.23816200  |
| H | -2.68073100 | -0.48440000 | 3.63853200  |
| H | -2.64123300 | 1.54105000  | 5.08501000  |
| C | 0.51354400  | -2.28347200 | 1.56825000  |
| C | 0.98179300  | -2.57653900 | 2.85978600  |
| C | -0.69359000 | -2.85453500 | 1.13631900  |
| C | 0.24767100  | -3.41075500 | 3.70311800  |
| H | 1.92170700  | -2.16334500 | 3.21297600  |
| C | -1.42285600 | -3.69638400 | 1.97906500  |
| H | -1.06391500 | -2.62831700 | 0.13985400  |
| C | -0.95435100 | -3.97237100 | 3.26491900  |
| H | 0.61813700  | -3.62638200 | 4.70110100  |
| H | -2.35476500 | -4.13385600 | 1.63204400  |
| H | -1.52069800 | -4.62546600 | 3.92255000  |
| C | 2.89642000  | -2.32089800 | -0.04799400 |
| C | 2.69135800  | -3.70218800 | -0.20591600 |
| C | 4.18133000  | -1.79734100 | -0.28139400 |
| C | 3.73954000  | -4.53710700 | -0.59664800 |
| H | 1.71951500  | -4.13811700 | 0.00484100  |
| C | 5.22636800  | -2.63785400 | -0.66910700 |
| H | 4.39247700  | -0.74284700 | -0.13698600 |
| C | 5.00837600  | -4.00699800 | -0.83373300 |
| H | 3.56396500  | -5.60368500 | -0.70377700 |
| H | 6.21505400  | -2.21911700 | -0.83353000 |

|    |             |             |             |
|----|-------------|-------------|-------------|
| H  | 5.82483000  | -4.65741900 | -1.13336000 |
| C  | 1.04874200  | 2.86061300  | -0.12223700 |
| H  | 1.51493800  | 2.85015000  | -1.11318000 |
| H  | 0.68347300  | 3.87844200  | 0.05031100  |
| C  | 2.30296000  | 0.02820800  | 1.52979600  |
| H  | 1.56518000  | 0.35456100  | 2.27036400  |
| H  | 3.11840000  | -0.45797300 | 2.07232300  |
| C  | 2.12678200  | 2.55543000  | 0.91458400  |
| H  | 1.71135800  | 2.62594500  | 1.93109000  |
| C  | 2.88735100  | 1.23100500  | 0.76804900  |
| H  | 2.99539400  | 1.00751300  | -0.30654100 |
| O  | 3.15794100  | 3.51674000  | 0.73155900  |
| O  | 4.15591700  | 1.54147400  | 1.32978700  |
| C  | 4.39347100  | 2.95857900  | 1.20494400  |
| C  | 5.46745000  | 3.22895300  | 0.15840800  |
| H  | 5.59210000  | 4.30634400  | 0.01322700  |
| H  | 6.42402000  | 2.80568600  | 0.47894000  |
| H  | 5.18325400  | 2.78012200  | -0.79825100 |
| C  | 4.74108300  | 3.50432300  | 2.58576500  |
| H  | 5.63817500  | 3.01191500  | 2.97344000  |
| H  | 4.92696500  | 4.58110800  | 2.53127900  |
| H  | 3.91783300  | 3.32277000  | 3.28320400  |
| C  | 0.33466400  | -2.31264200 | -2.53982300 |
| H  | 0.59373500  | -3.04824100 | -1.78305900 |
| C  | -0.93652500 | -2.61359800 | -3.32089800 |
| H  | -0.72740200 | -2.58238000 | -4.39411200 |
| H  | -1.24084400 | -3.64382000 | -3.10752000 |
| C  | -2.10892900 | -1.67149900 | -2.96841600 |
| H  | -2.86433600 | -1.69182200 | -3.76899800 |
| H  | -2.61528300 | -2.04860900 | -2.07229500 |
| C  | -1.69879200 | -0.24171100 | -2.69430100 |
| H  | -2.40205400 | 0.31986000  | -2.08276600 |
| C  | -0.73748600 | 0.49114900  | -3.36989900 |
| H  | -0.74478900 | 1.56486000  | -3.20959500 |
| C  | 0.06186700  | 0.01841700  | -4.57156700 |
| H  | 0.24521300  | 0.87485000  | -5.22925800 |
| H  | -0.52819200 | -0.69058600 | -5.15873100 |
| C  | 1.41567000  | -0.60028200 | -4.17225700 |
| H  | 2.13844500  | 0.20331400  | -3.98762200 |
| H  | 1.82824100  | -1.18928500 | -5.00628300 |
| C  | 1.35921300  | -1.45924200 | -2.93059900 |
| H  | 2.32404100  | -1.60910600 | -2.45199700 |
| Rh | 0.15686000  | -0.33881100 | -1.38427600 |

**INT8**

|   |             |             |             |
|---|-------------|-------------|-------------|
| P | 0.92380100  | 1.92764200  | 0.75341200  |
| P | 2.45801900  | -1.30751300 | 1.10923200  |
| C | 1.36190200  | 2.90306700  | -0.75059400 |
| C | 0.62988400  | 2.66371100  | -1.92890400 |
| C | 2.39367300  | 3.85591200  | -0.77964400 |
| C | 0.92325700  | 3.36094100  | -3.10068500 |
| H | -0.17862200 | 1.93956500  | -1.92123100 |
| C | 2.68540100  | 4.54976800  | -1.95669400 |
| H | 2.97504800  | 4.07445100  | 0.10944900  |
| C | 1.95354900  | 4.30396300  | -3.11886000 |
| H | 0.34559100  | 3.16747100  | -4.00032800 |
| H | 3.48436200  | 5.28587800  | -1.96000200 |
| H | 2.18231300  | 4.84570300  | -4.03213200 |
| C | -0.58330900 | 2.75040700  | 1.42298300  |
| C | -0.78908200 | 4.13096700  | 1.26840000  |
| C | -1.52245200 | 1.99783800  | 2.14417400  |
| C | -1.90838000 | 4.74450300  | 1.83135800  |
| H | -0.07928600 | 4.72778200  | 0.70271300  |
| C | -2.63873300 | 2.61532700  | 2.71222500  |
| H | -1.38575500 | 0.92632200  | 2.25431600  |
| C | -2.83349200 | 3.98864800  | 2.55608900  |
| H | -2.05710000 | 5.81312600  | 1.70450500  |
| H | -3.35646700 | 2.02212500  | 3.27196900  |
| H | -3.70296400 | 4.46904400  | 2.99583800  |
| C | 2.60429900  | -3.14319300 | 1.11366100  |
| C | 1.84484200  | -3.89575800 | 2.02538900  |
| C | 3.42005300  | -3.81296900 | 0.18987100  |
| C | 1.92249500  | -5.28821900 | 2.02886800  |
| H | 1.18965100  | -3.40258600 | 2.73789800  |
| C | 3.48954900  | -5.20814300 | 0.19218200  |
| H | 4.00881700  | -3.25176100 | -0.52854200 |
| C | 2.74620900  | -5.94740000 | 1.11266600  |
| H | 1.34158300  | -5.85714900 | 2.74922700  |
| H | 4.12970100  | -5.71368900 | -0.52498000 |
| H | 2.80725200  | -7.03180300 | 1.11715600  |
| C | 4.01141800  | -0.71983600 | 0.33099700  |
| C | 5.26455900  | -1.00718300 | 0.90232700  |
| C | 3.95847000  | 0.01298400  | -0.86385000 |
| C | 6.43481100  | -0.55853200 | 0.29226100  |
| H | 5.33084100  | -1.58804300 | 1.81814700  |
| C | 5.13325000  | 0.45879100  | -1.47482900 |
| H | 2.99970700  | 0.24077500  | -1.32224000 |
| C | 6.37055900  | 0.17569000  | -0.89623800 |

|   |             |             |             |
|---|-------------|-------------|-------------|
| H | 7.39708600  | -0.78370800 | 0.74272300  |
| H | 5.07689300  | 1.02644800  | -2.39884700 |
| H | 7.28466500  | 0.52261700  | -1.36927500 |
| C | 2.22584300  | 2.44216800  | 1.98135500  |
| H | 3.21144200  | 2.35729000  | 1.51104700  |
| H | 2.06349300  | 3.49643800  | 2.22757200  |
| C | 2.62737400  | -0.93918600 | 2.93341100  |
| H | 1.65145900  | -1.12125300 | 3.39487700  |
| H | 3.31636400  | -1.68516000 | 3.34347900  |
| C | 2.20077100  | 1.64550600  | 3.28705100  |
| H | 1.17498700  | 1.33882400  | 3.55026900  |
| C | 3.14364800  | 0.43369200  | 3.36352600  |
| H | 4.07442400  | 0.67573900  | 2.82802000  |
| O | 2.73580800  | 2.48276600  | 4.30669500  |
| O | 3.39511600  | 0.33806200  | 4.76152600  |
| C | 3.28728300  | 1.65259700  | 5.33900600  |
| C | 4.66678400  | 2.19361200  | 5.69651300  |
| H | 4.58769000  | 3.22256100  | 6.06082400  |
| H | 5.12386200  | 1.57877300  | 6.47756600  |
| H | 5.31490600  | 2.18608300  | 4.81511600  |
| C | 2.34170200  | 1.57055700  | 6.53311000  |
| H | 2.72726300  | 0.86300500  | 7.27369500  |
| H | 2.24066200  | 2.55274100  | 7.00450300  |
| H | 1.35252900  | 1.23098100  | 6.21122900  |
| C | -4.38945900 | -1.02419300 | -1.70616700 |
| C | -3.59471200 | 0.05140600  | -1.29993700 |
| C | -4.11935500 | 1.32986200  | -1.10400900 |
| C | -5.48196500 | 1.50757700  | -1.33987600 |
| C | -6.28415500 | 0.43242100  | -1.75327300 |
| C | -5.74856200 | -0.84665100 | -1.94005000 |
| C | -3.53000400 | -2.25354000 | -1.81177000 |
| H | -3.48610700 | 2.14735000  | -0.77468800 |
| H | -5.93075200 | 2.48644500  | -1.20116800 |
| H | -7.34328200 | 0.59612900  | -1.92947800 |
| H | -6.38260300 | -1.67006700 | -2.25620200 |
| H | -3.82609900 | -3.04817200 | -1.11710800 |
| N | -2.18369700 | -1.75338400 | -1.44587200 |
| C | -2.22530500 | -0.43558900 | -1.11948300 |
| O | -1.25601500 | 0.26262700  | -0.72206200 |
| H | -3.51989700 | -2.68136600 | -2.81747000 |
| C | 0.08284000  | -2.25730100 | -0.67169900 |
| C | -1.04493500 | -2.59685100 | -1.34304500 |
| H | -0.12479700 | -0.89132300 | 1.43641900  |
| H | 0.83599800  | -3.04083100 | -0.67615200 |



|    |             |             |             |
|----|-------------|-------------|-------------|
| C  | -1.15011800 | -3.90648500 | -2.05604300 |
| C  | -1.33996100 | -3.95984400 | -3.44826700 |
| C  | -1.00622800 | -5.10816900 | -1.34645900 |
| C  | -1.39206500 | -5.18575600 | -4.11028000 |
| H  | -1.42040200 | -3.03582800 | -4.01630900 |
| C  | -1.05977800 | -6.33464100 | -2.01092000 |
| H  | -0.85211000 | -5.07450500 | -0.27170600 |
| C  | -1.25624500 | -6.37705700 | -3.39214300 |
| H  | -1.52911300 | -5.21133100 | -5.18766900 |
| H  | -0.95193600 | -7.25721300 | -1.44753300 |
| H  | -1.29922900 | -7.33169700 | -3.90844800 |
| Rh | 0.53648200  | -0.47034300 | 0.12804800  |

**TS6a**

|   |             |             |             |
|---|-------------|-------------|-------------|
| P | 0.97024000  | 0.49102100  | -3.25778300 |
| P | 2.01345000  | -1.35081200 | -0.40179400 |
| C | 0.55438900  | -0.32489400 | -4.86025500 |
| C | -0.73556200 | -0.15165300 | -5.39208800 |
| C | 1.46480300  | -1.13349100 | -5.55873100 |
| C | -1.10428800 | -0.77392300 | -6.58406300 |
| H | -1.44540700 | 0.49750500  | -4.88989700 |
| C | 1.09296100  | -1.75676700 | -6.75287600 |
| H | 2.47568300  | -1.27655300 | -5.19272300 |
| C | -0.19197200 | -1.58259900 | -7.26746000 |
| H | -2.10057200 | -0.61416500 | -6.98729200 |
| H | 1.81597400  | -2.36811200 | -7.28559700 |
| H | -0.47609100 | -2.05951500 | -8.20114000 |
| C | 0.38254400  | 2.22263800  | -3.53483800 |
| C | 0.64835000  | 2.84726400  | -4.76723900 |
| C | -0.27298400 | 2.95265200  | -2.53534100 |
| C | 0.27398800  | 4.17170400  | -4.98639600 |
| H | 1.14267300  | 2.29912600  | -5.56411000 |
| C | -0.64779600 | 4.28032600  | -2.75729000 |
| H | -0.49137900 | 2.48005000  | -1.58545100 |
| C | -0.37514600 | 4.89230700  | -3.98049400 |
| H | 0.49016300  | 4.64024000  | -5.94220300 |
| H | -1.15261300 | 4.83465800  | -1.97077800 |
| H | -0.66627100 | 5.92476100  | -4.15178500 |
| C | 1.80175300  | -2.23930000 | 1.20008300  |
| C | 1.98367600  | -1.60315700 | 2.43803300  |
| C | 1.39755800  | -3.58605400 | 1.18112900  |
| C | 1.77367200  | -2.30105400 | 3.63053200  |
| H | 2.30229100  | -0.56665200 | 2.48893000  |
| C | 1.18847300  | -4.27840100 | 2.37284000  |

|   |             |             |             |
|---|-------------|-------------|-------------|
| H | 1.25706200  | -4.09907600 | 0.23428400  |
| C | 1.37584700  | -3.63739000 | 3.60076500  |
| H | 1.92749500  | -1.79739400 | 4.58046400  |
| H | 0.88491300  | -5.32085900 | 2.34232700  |
| H | 1.21627700  | -4.17929800 | 4.52830300  |
| C | 3.04264200  | -2.54361200 | -1.36313600 |
| C | 4.20012600  | -3.07357500 | -0.76254900 |
| C | 2.72773100  | -2.91925500 | -2.67549100 |
| C | 5.02558000  | -3.94781600 | -1.46703400 |
| H | 4.45565400  | -2.81241800 | 0.26032900  |
| C | 3.55433100  | -3.80212900 | -3.37686700 |
| H | 1.82811100  | -2.54265200 | -3.14707800 |
| C | 4.70420200  | -4.31437700 | -2.77722300 |
| H | 5.91666800  | -4.34660300 | -0.99108000 |
| H | 3.28965600  | -4.09275800 | -4.38959300 |
| H | 5.34532400  | -5.00076600 | -3.32268600 |
| C | 2.81534400  | 0.72496000  | -3.36089900 |
| H | 3.30771900  | -0.24272400 | -3.49551800 |
| H | 3.01814300  | 1.32590000  | -4.25271100 |
| C | 3.21724100  | 0.00300300  | 0.04701300  |
| H | 2.65107600  | 0.81457100  | 0.51415600  |
| H | 3.90502300  | -0.39884800 | 0.79861400  |
| C | 3.40742100  | 1.45261000  | -2.14939700 |
| H | 2.66238000  | 2.10977300  | -1.67427200 |
| C | 4.07192000  | 0.56707300  | -1.08605200 |
| H | 4.61019200  | -0.24958700 | -1.59070100 |
| O | 4.51796300  | 2.22142300  | -2.60182900 |
| O | 4.99973200  | 1.46709100  | -0.49158000 |
| C | 5.41858800  | 2.40899100  | -1.49782100 |
| C | 6.82941300  | 2.08773500  | -1.97777400 |
| H | 7.11107900  | 2.75361900  | -2.79937700 |
| H | 7.54567700  | 2.21554400  | -1.16070400 |
| H | 6.88037500  | 1.05496500  | -2.33512700 |
| C | 5.28090400  | 3.81302300  | -0.91898100 |
| H | 5.90314900  | 3.91674000  | -0.02464200 |
| H | 5.59649000  | 4.55849300  | -1.65499900 |
| H | 4.24030800  | 4.00863000  | -0.64304900 |
| C | -4.79364900 | -0.92726900 | -3.65065100 |
| C | -4.02686900 | 0.09757300  | -3.09123500 |
| C | -4.48701600 | 1.41328600  | -3.02153300 |
| C | -5.75831900 | 1.67891400  | -3.52950100 |
| C | -6.53542500 | 0.65177500  | -4.08701100 |
| C | -6.06205000 | -0.66317000 | -4.15598000 |
| C | -4.00739400 | -2.20541600 | -3.58624200 |

|    |             |             |             |
|----|-------------|-------------|-------------|
| H  | -3.86860200 | 2.19687500  | -2.59518400 |
| H  | -6.15375600 | 2.68956200  | -3.49526400 |
| H  | -7.52348500 | 0.88277600  | -4.47430400 |
| H  | -6.67351800 | -1.44770300 | -4.59279900 |
| H  | -4.49720100 | -2.98444400 | -2.99200400 |
| N  | -2.74230600 | -1.79577100 | -2.93741900 |
| C  | -2.75112500 | -0.47428200 | -2.64073700 |
| O  | -1.84694000 | 0.20012900  | -2.07633600 |
| H  | -3.80156400 | -2.62914700 | -4.57461100 |
| C  | -0.53107100 | -2.40040800 | -2.07324100 |
| C  | -1.68331600 | -2.73153900 | -2.68122200 |
| H  | 0.32309100  | 0.91338500  | -0.50812100 |
| H  | 0.12698000  | -3.25837200 | -1.95232900 |
| C  | -1.96333700 | -4.13139800 | -3.14579600 |
| C  | -1.70712500 | -4.51242600 | -4.47319800 |
| C  | -2.45574500 | -5.09300300 | -2.25009200 |
| C  | -1.94067700 | -5.82331000 | -4.89242800 |
| H  | -1.31237300 | -3.77902400 | -5.17214900 |
| C  | -2.68805800 | -6.40447300 | -2.66978000 |
| H  | -2.65079900 | -4.80904000 | -1.21899500 |
| C  | -2.43291900 | -6.77153600 | -3.99250700 |
| H  | -1.73318100 | -6.10631300 | -5.92090900 |
| H  | -3.06693000 | -7.13839800 | -1.96382200 |
| H  | -2.61297000 | -7.79164400 | -4.31972500 |
| C  | -1.17569500 | -1.04370700 | 0.51428600  |
| C  | -0.74064800 | 0.25157000  | 0.85547700  |
| H  | -0.72466000 | -1.90840500 | 0.98355600  |
| H  | -2.19479300 | -1.17568200 | 0.16240800  |
| H  | 0.11753800  | 0.32101500  | 1.51893500  |
| C  | -1.67286100 | 1.43859800  | 0.87359900  |
| H  | -1.13094800 | 2.38870200  | 0.88296600  |
| H  | -2.35100200 | 1.42093900  | 0.01731500  |
| H  | -2.27774100 | 1.38880600  | 1.78936900  |
| Rh | 0.00826600  | -0.54027100 | -1.29133400 |

**TS6b**

|   |             |             |             |
|---|-------------|-------------|-------------|
| P | 0.87666700  | 0.41225000  | -3.13804800 |
| P | 2.17092700  | -1.43171400 | -0.36953300 |
| C | 0.36600700  | -0.38282800 | -4.72618800 |
| C | -0.90358500 | -0.10337000 | -5.26093700 |
| C | 1.19590300  | -1.28573700 | -5.41065900 |
| C | -1.33266700 | -0.71519600 | -6.43916500 |
| H | -1.55191500 | 0.61819900  | -4.77478800 |
| C | 0.76493200  | -1.89584600 | -6.59140300 |

|   |             |             |             |
|---|-------------|-------------|-------------|
| H | 2.19046600  | -1.51380100 | -5.04358100 |
| C | -0.50131800 | -1.61719600 | -7.10707800 |
| H | -2.31177800 | -0.47189400 | -6.84267200 |
| H | 1.42866400  | -2.57884500 | -7.11437800 |
| H | -0.83144600 | -2.08687600 | -8.02912800 |
| C | 0.27018200  | 2.14781900  | -3.35086200 |
| C | 0.52130300  | 2.81692000  | -4.56310500 |
| C | -0.39049400 | 2.83640300  | -2.32509400 |
| C | 0.12970700  | 4.14301200  | -4.73648800 |
| H | 1.01757800  | 2.30247600  | -5.38083300 |
| C | -0.78291400 | 4.16611200  | -2.50113400 |
| H | -0.60196600 | 2.33031300  | -1.39139500 |
| C | -0.52293600 | 4.82192200  | -3.70411300 |
| H | 0.33611300  | 4.64581700  | -5.67690800 |
| H | -1.29043800 | 4.68732700  | -1.69407000 |
| H | -0.82643700 | 5.85614300  | -3.83939300 |
| C | 2.11595600  | -2.32517600 | 1.24381700  |
| C | 2.36233700  | -1.67500500 | 2.46359100  |
| C | 1.76855600  | -3.68769700 | 1.25903900  |
| C | 2.26915200  | -2.37327200 | 3.67010500  |
| H | 2.63992500  | -0.62581200 | 2.48872200  |
| C | 1.67515200  | -4.38048200 | 2.46525000  |
| H | 1.58257500  | -4.21399400 | 0.32752600  |
| C | 1.92486500  | -3.72492700 | 3.67400800  |
| H | 2.47116200  | -1.85775100 | 4.60452200  |
| H | 1.41318500  | -5.43455900 | 2.46003000  |
| H | 1.85530200  | -4.26687100 | 4.61256100  |
| C | 3.14236600  | -2.60198000 | -1.41282400 |
| C | 4.38586100  | -3.06053100 | -0.93814700 |
| C | 2.68988100  | -3.04231100 | -2.66290100 |
| C | 5.16129400  | -3.92519300 | -1.70796100 |
| H | 4.74957700  | -2.75146100 | 0.03770100  |
| C | 3.46739200  | -3.91612000 | -3.42925600 |
| H | 1.72203000  | -2.72225100 | -3.03011200 |
| C | 4.70366900  | -4.35489200 | -2.95713000 |
| H | 6.12020300  | -4.26763500 | -1.33005400 |
| H | 3.09812600  | -4.25739000 | -4.39233800 |
| H | 5.30684700  | -5.03357500 | -3.55315100 |
| C | 2.70988800  | 0.65327500  | -3.37213000 |
| H | 3.19276100  | -0.31499000 | -3.53344000 |
| H | 2.84801800  | 1.24412600  | -4.28245500 |
| C | 3.37619400  | -0.05253700 | -0.01063000 |
| H | 2.82915900  | 0.75045500  | 0.49295800  |
| H | 4.12158100  | -0.43603000 | 0.69395700  |

|   |             |             |             |
|---|-------------|-------------|-------------|
| C | 3.38421100  | 1.39507000  | -2.21381600 |
| H | 2.66947700  | 2.04554800  | -1.68563400 |
| C | 4.13895400  | 0.52333700  | -1.20165200 |
| H | 4.65084900  | -0.28578400 | -1.74436800 |
| O | 4.44745800  | 2.17599500  | -2.75095300 |
| O | 5.09335500  | 1.43917400  | -0.67835500 |
| C | 5.42155700  | 2.38482900  | -1.71496100 |
| C | 6.79974800  | 2.08745500  | -2.29436300 |
| H | 7.00743600  | 2.75329000  | -3.13771200 |
| H | 7.57093500  | 2.23461600  | -1.53237800 |
| H | 6.84500000  | 1.05350200  | -2.64902500 |
| C | 5.29980500  | 3.78842200  | -1.13150700 |
| H | 5.98025200  | 3.90597600  | -0.28241200 |
| H | 5.55106800  | 4.53656600  | -1.88928500 |
| H | 4.27761800  | 3.96764800  | -0.78468900 |
| C | -4.53676500 | -0.92789700 | -3.77606400 |
| C | -3.87201100 | 0.04031600  | -3.01958200 |
| C | -4.34866800 | 1.34708700  | -2.90630700 |
| C | -5.53205800 | 1.66162400  | -3.57400700 |
| C | -6.20663100 | 0.69148900  | -4.33120900 |
| C | -5.71621500 | -0.61426600 | -4.44311900 |
| C | -3.76259400 | -2.21270400 | -3.70011300 |
| H | -3.80964100 | 2.08736100  | -2.32384600 |
| H | -5.93801700 | 2.66661600  | -3.50966800 |
| H | -7.12726800 | 0.96002400  | -4.84108700 |
| H | -6.24790200 | -1.35496700 | -5.03383800 |
| H | -4.34398500 | -3.03840800 | -3.27958000 |
| N | -2.62863000 | -1.87541900 | -2.81250000 |
| C | -2.66684200 | -0.57176200 | -2.44395300 |
| O | -1.83334900 | 0.05864100  | -1.73922700 |
| H | -3.37931000 | -2.53854800 | -4.67408400 |
| C | -0.48314000 | -2.52518900 | -1.82470800 |
| C | -1.62384600 | -2.83990400 | -2.46529500 |
| H | 0.41919100  | 0.83223500  | -0.40429200 |
| H | 0.12243900  | -3.40472500 | -1.61352100 |
| C | -1.95364400 | -4.25253700 | -2.84950700 |
| C | -1.29906100 | -4.86328100 | -3.92960200 |
| C | -2.89008600 | -5.00227100 | -2.11784500 |
| C | -1.56994500 | -6.19115800 | -4.26762500 |
| H | -0.57929400 | -4.28826000 | -4.50607700 |
| C | -3.16300500 | -6.32772400 | -2.45723300 |
| H | -3.39537500 | -4.54735400 | -1.26881400 |
| C | -2.50308000 | -6.92557500 | -3.53402300 |
| H | -1.05350300 | -6.65086400 | -5.10594400 |

|    |             |             |             |
|----|-------------|-------------|-------------|
| H  | -3.88446700 | -6.89609500 | -1.87672400 |
| H  | -2.71394500 | -7.95823000 | -3.79698500 |
| C  | -0.42045800 | 0.16052900  | 1.02871800  |
| C  | -0.92892500 | -1.14690800 | 0.88700800  |
| H  | 0.47586700  | 0.33164300  | 1.61573400  |
| H  | -1.10784400 | 1.00207400  | 0.98776500  |
| H  | -0.33522500 | -1.95392800 | 1.30175000  |
| C  | -2.40951900 | -1.42888500 | 0.81663600  |
| H  | -2.77816400 | -1.63744900 | 1.83085300  |
| H  | -2.97337800 | -0.57931700 | 0.42449400  |
| H  | -2.62202300 | -2.31115500 | 0.20594900  |
| Rh | 0.08210700  | -0.65374700 | -1.09524000 |

**INT9a**

|   |             |             |             |
|---|-------------|-------------|-------------|
| P | 1.13443500  | 0.65372600  | -3.49754500 |
| P | 1.95905400  | -1.83974300 | -0.98911000 |
| C | 1.11403700  | -0.00979800 | -5.22434300 |
| C | -0.10851700 | -0.47704700 | -5.74256400 |
| C | 2.25639500  | -0.07779400 | -6.03917400 |
| C | -0.18185300 | -0.99970300 | -7.03357500 |
| H | -1.00419500 | -0.42279800 | -5.13354800 |
| C | 2.17927600  | -0.60500800 | -7.33105300 |
| H | 3.21452700  | 0.28662300  | -5.68674700 |
| C | 0.96274400  | -1.06970700 | -7.83104700 |
| H | -1.13572300 | -1.35108400 | -7.41744400 |
| H | 3.07362100  | -0.64406400 | -7.94665900 |
| H | 0.90528600  | -1.47729300 | -8.83629600 |
| C | 0.34029800  | 2.31283800  | -3.66158100 |
| C | 0.36772200  | 3.02353900  | -4.87301600 |
| C | -0.25782500 | 2.90831100  | -2.54084700 |
| C | -0.18731800 | 4.30087600  | -4.95572000 |
| H | 0.81860600  | 2.58001300  | -5.75551100 |
| C | -0.80723300 | 4.18946300  | -2.62400100 |
| H | -0.29997600 | 2.37217900  | -1.59930000 |
| C | -0.77420300 | 4.88738400  | -3.83189600 |
| H | -0.15938300 | 4.83838200  | -5.89943200 |
| H | -1.26289100 | 4.63856800  | -1.74589600 |
| H | -1.20392300 | 5.88282700  | -3.89849700 |
| C | 1.77062400  | -3.08447600 | 0.35934200  |
| C | 1.61558900  | -2.68727600 | 1.69803200  |
| C | 1.72495200  | -4.45377400 | 0.04918500  |
| C | 1.42974400  | -3.63936800 | 2.70215500  |
| H | 1.65181700  | -1.63777700 | 1.97356700  |
| C | 1.53640200  | -5.40197800 | 1.05536700  |

|   |             |             |             |
|---|-------------|-------------|-------------|
| H | 1.84722000  | -4.78505200 | -0.97770900 |
| C | 1.38929900  | -4.99764800 | 2.38358100  |
| H | 1.32378200  | -3.31658100 | 3.73391600  |
| H | 1.50971600  | -6.45717400 | 0.79934300  |
| H | 1.24903100  | -5.73719200 | 3.16654500  |
| C | 3.09104500  | -2.66909800 | -2.17552100 |
| C | 4.37224600  | -3.09023400 | -1.77478100 |
| C | 2.67332700  | -2.91467700 | -3.49117000 |
| C | 5.21746200  | -3.72977400 | -2.67954500 |
| H | 4.70888300  | -2.93003100 | -0.75414200 |
| C | 3.52151200  | -3.55977400 | -4.39558200 |
| H | 1.68547000  | -2.60205300 | -3.81736000 |
| C | 4.79364200  | -3.96431200 | -3.99165500 |
| H | 6.20543200  | -4.04869600 | -2.36036700 |
| H | 3.18466300  | -3.74010500 | -5.41204500 |
| H | 5.45433900  | -4.46494100 | -4.69355700 |
| C | 2.92800700  | 1.11024700  | -3.25914200 |
| H | 3.55315000  | 0.27380800  | -3.58872100 |
| H | 3.15421600  | 1.96788400  | -3.90017800 |
| C | 2.99472800  | -0.54178600 | -0.13124200 |
| H | 2.32164700  | 0.08389400  | 0.46364200  |
| H | 3.63933400  | -1.07094500 | 0.57820000  |
| C | 3.29139000  | 1.48104000  | -1.81950400 |
| H | 2.43452400  | 1.92907000  | -1.28932100 |
| C | 3.90485500  | 0.35533100  | -0.96902800 |
| H | 4.55018200  | -0.26001900 | -1.61438000 |
| O | 4.36783400  | 2.41080700  | -1.87471500 |
| O | 4.69701400  | 1.08479300  | -0.03754900 |
| C | 5.14213900  | 2.29740000  | -0.67074200 |
| C | 6.61217700  | 2.18996300  | -1.06116900 |
| H | 6.92349700  | 3.08125500  | -1.61464900 |
| H | 7.23617300  | 2.09532900  | -0.16743700 |
| H | 6.76993500  | 1.31393900  | -1.69742600 |
| C | 4.84952900  | 3.45987300  | 0.27173200  |
| H | 5.37832600  | 3.32229600  | 1.22003300  |
| H | 5.17440100  | 4.40263500  | -0.17837900 |
| H | 3.77643800  | 3.51876100  | 0.47742800  |
| C | -5.23435000 | -1.18797300 | -3.02121400 |
| C | -4.15818700 | -0.37377700 | -3.38364600 |
| C | -4.33138000 | 0.80802700  | -4.10531600 |
| C | -5.63237700 | 1.15487400  | -4.46780400 |
| C | -6.71693800 | 0.33849700  | -4.11081700 |
| C | -6.53172800 | -0.84197200 | -3.38263100 |
| C | -4.71318500 | -2.36857000 | -2.24932600 |

|    |             |             |             |
|----|-------------|-------------|-------------|
| H  | -3.48083100 | 1.43019700  | -4.36588800 |
| H  | -5.81184500 | 2.06609200  | -5.03022100 |
| H  | -7.72119800 | 0.63045200  | -4.40371100 |
| H  | -7.38140700 | -1.46169700 | -3.11058700 |
| H  | -5.09139300 | -2.41382800 | -1.22168600 |
| N  | -3.24896100 | -2.13902600 | -2.23148800 |
| C  | -2.92993500 | -0.97859400 | -2.86281700 |
| O  | -1.77778600 | -0.48925900 | -2.98530400 |
| H  | -4.94406300 | -3.32466900 | -2.72677400 |
| C  | -1.05062200 | -2.66107700 | -1.27563200 |
| C  | -2.34175900 | -2.98291200 | -1.53324800 |
| H  | -2.55573500 | -0.38287100 | -0.06447700 |
| H  | -0.53197100 | -3.41763800 | -0.69274300 |
| C  | -2.90384300 | -4.29927800 | -1.09459700 |
| C  | -3.29581000 | -5.26707300 | -2.03586400 |
| C  | -3.00498800 | -4.60467900 | 0.27074000  |
| C  | -3.78380600 | -6.50520100 | -1.61925700 |
| H  | -3.19654100 | -5.05503100 | -3.09807600 |
| C  | -3.49342300 | -5.84490600 | 0.68658100  |
| H  | -2.69965500 | -3.86393400 | 1.00456100  |
| C  | -3.88696100 | -6.79586300 | -0.25615900 |
| H  | -4.07520100 | -7.24642600 | -2.35815200 |
| H  | -3.56935200 | -6.06533600 | 1.74765500  |
| H  | -4.26833400 | -7.76002300 | 0.06753500  |
| C  | -0.42574400 | -0.06412200 | -0.18867300 |
| C  | -1.85061400 | 0.45566800  | -0.05613600 |
| H  | 0.29644200  | 0.75924700  | -0.19172500 |
| H  | -0.19677500 | -0.73785400 | 0.64136200  |
| H  | -2.10937600 | 1.10104700  | -0.90176800 |
| C  | -2.02280400 | 1.24336900  | 1.25701900  |
| H  | -3.05050100 | 1.61113500  | 1.35390000  |
| H  | -1.80748900 | 0.61652700  | 2.13020000  |
| H  | -1.35326100 | 2.11110200  | 1.29624000  |
| Rh | -0.02082900 | -1.09293900 | -1.96958400 |

**INT9b**

|   |             |             |             |
|---|-------------|-------------|-------------|
| P | 1.05084800  | 0.70454100  | -3.20386700 |
| P | 2.19916200  | -1.88427800 | -0.89332000 |
| C | 0.93508800  | 0.15705900  | -4.96660000 |
| C | -0.01461600 | -0.81166400 | -5.33041400 |
| C | 1.76196500  | 0.69906700  | -5.96482900 |
| C | -0.12767700 | -1.23460700 | -6.65728500 |
| H | -0.67928600 | -1.22375600 | -4.57755700 |
| C | 1.65105300  | 0.27148400  | -7.28803800 |



|   |             |             |             |
|---|-------------|-------------|-------------|
| H | 2.49443000  | 1.46192700  | -5.72095800 |
| C | 0.70809200  | -0.69795800 | -7.63753300 |
| H | -0.87000800 | -1.98247800 | -6.92272200 |
| H | 2.29988600  | 0.69975000  | -8.04679500 |
| H | 0.62259900  | -1.02793300 | -8.66894300 |
| C | 0.18835300  | 2.34081400  | -3.23962700 |
| C | -1.04243500 | 2.44826700  | -3.90951300 |
| C | 0.70355200  | 3.47534100  | -2.59089000 |
| C | -1.73884800 | 3.65621300  | -3.92867100 |
| H | -1.44350400 | 1.59017600  | -4.43911000 |
| C | -0.00064400 | 4.68201500  | -2.60852000 |
| H | 1.66442000  | 3.44736600  | -2.08797500 |
| C | -1.22322300 | 4.77643200  | -3.27271500 |
| H | -2.68058500 | 3.72666000  | -4.46635600 |
| H | 0.41749300  | 5.55119800  | -2.10865900 |
| H | -1.76509900 | 5.71755600  | -3.28936300 |
| C | 2.24613300  | -3.29212400 | 0.30629100  |
| C | 2.51079100  | -3.10910300 | 1.67285200  |
| C | 1.99141500  | -4.59236300 | -0.16320200 |
| C | 2.52440400  | -4.19943100 | 2.54595800  |
| H | 2.72202800  | -2.12289000 | 2.07296600  |
| C | 2.00383200  | -5.67839900 | 0.71098000  |
| H | 1.79472400  | -4.76187200 | -1.21774400 |
| C | 2.27008500  | -5.48496400 | 2.06843600  |
| H | 2.74034600  | -4.03931800 | 3.59836200  |
| H | 1.80981900  | -6.67647800 | 0.32910100  |
| H | 2.28386400  | -6.33208100 | 2.74795600  |
| C | 3.14123100  | -2.58646200 | -2.31257500 |
| C | 4.48286900  | -2.98172700 | -2.16138800 |
| C | 2.51128900  | -2.78628700 | -3.54818400 |
| C | 5.17819500  | -3.54012000 | -3.23234600 |
| H | 4.98564300  | -2.86777400 | -1.20497500 |
| C | 3.20836700  | -3.34969000 | -4.62052300 |
| H | 1.47276100  | -2.50055500 | -3.68304300 |
| C | 4.54289600  | -3.72237600 | -4.46501000 |
| H | 6.21492700  | -3.83753700 | -3.10396800 |
| H | 2.70513800  | -3.48987100 | -5.57263200 |
| H | 5.08789700  | -4.15836100 | -5.29726400 |
| C | 2.84368400  | 1.19429200  | -3.06451100 |
| H | 3.43940300  | 0.40966400  | -3.54305100 |
| H | 3.00321700  | 2.11308900  | -3.63601000 |
| C | 3.37655600  | -0.67968500 | -0.08858500 |
| H | 2.81676000  | -0.12267100 | 0.66895500  |
| H | 4.12848400  | -1.26789400 | 0.44665600  |

|   |             |             |             |
|---|-------------|-------------|-------------|
| C | 3.34493000  | 1.44995800  | -1.63594200 |
| H | 2.52373000  | 1.75430200  | -0.96764000 |
| C | 4.13477800  | 0.31517700  | -0.96743100 |
| H | 4.72159500  | -0.21750100 | -1.73026900 |
| O | 4.31490000  | 2.48995600  | -1.70789000 |
| O | 4.99926700  | 1.02603600  | -0.08681400 |
| C | 5.27287800  | 2.31848900  | -0.64908200 |
| C | 6.66903400  | 2.35603000  | -1.26188300 |
| H | 6.83680500  | 3.31360400  | -1.76443300 |
| H | 7.42790700  | 2.23000000  | -0.48388900 |
| H | 6.78028800  | 1.55412400  | -1.99786700 |
| C | 5.06292200  | 3.36484700  | 0.43982400  |
| H | 5.74229400  | 3.18109600  | 1.27786100  |
| H | 5.25660800  | 4.36659200  | 0.04480800  |
| H | 4.03434000  | 3.32334500  | 0.81101400  |
| C | -5.18271500 | -1.57540700 | -2.30282200 |
| C | -4.18218500 | -0.73837200 | -2.80440500 |
| C | -4.47573600 | 0.33956000  | -3.64041500 |
| C | -5.81222900 | 0.55566200  | -3.97302200 |
| C | -6.81893900 | -0.28631200 | -3.47624400 |
| C | -6.51612700 | -1.36114900 | -2.63371700 |
| C | -4.54962000 | -2.62376600 | -1.43290100 |
| H | -3.68772400 | 0.98872900  | -4.00588200 |
| H | -6.08071400 | 1.38424800  | -4.62132800 |
| H | -7.85324800 | -0.09782800 | -3.74857900 |
| H | -7.30511800 | -2.00284900 | -2.25193400 |
| H | -4.88465100 | -2.58008900 | -0.39051000 |
| N | -3.10744700 | -2.29708800 | -1.50874800 |
| C | -2.89064700 | -1.20235700 | -2.28421000 |
| O | -1.77612200 | -0.66809300 | -2.52185200 |
| H | -4.72921400 | -3.64071100 | -1.79310600 |
| C | -0.82880700 | -2.61240600 | -0.65368200 |
| C | -2.11931600 | -3.00654600 | -0.77338900 |
| H | -1.43375800 | 1.54038000  | -1.11564200 |
| H | -0.24736100 | -3.27064700 | -0.01431700 |
| C | -2.59835600 | -4.26635000 | -0.11759300 |
| C | -2.93985800 | -5.39268200 | -0.88571700 |
| C | -2.67132700 | -4.35513600 | 1.28016700  |
| C | -3.35092000 | -6.57444500 | -0.26949700 |
| H | -2.86263300 | -5.34673900 | -1.96972100 |
| C | -3.08233500 | -5.53886400 | 1.89662700  |
| H | -2.40384000 | -3.49189800 | 1.88348400  |
| C | -3.42593200 | -6.64923800 | 1.12396700  |
| H | -3.60461500 | -7.43926400 | -0.87624300 |

|    |             |             |             |
|----|-------------|-------------|-------------|
| H  | -3.13574700 | -5.59111300 | 2.98044500  |
| H  | -3.74650600 | -7.56966400 | 1.60344800  |
| C  | -1.38290300 | 1.06433100  | -0.13570700 |
| C  | -0.12425500 | 0.23252300  | 0.06610200  |
| H  | -1.39315700 | 1.86256000  | 0.62331400  |
| H  | -2.28928700 | 0.46807100  | 0.01448600  |
| H  | 0.76160900  | 0.86257600  | -0.06414000 |
| C  | -0.10907500 | -0.41962000 | 1.44028400  |
| H  | -0.08131200 | 0.36915800  | 2.20887900  |
| H  | -1.01034000 | -1.01527300 | 1.60947100  |
| H  | 0.75138000  | -1.06967700 | 1.61009000  |
| Rh | 0.09206900  | -1.09502000 | -1.58221800 |

**TS7a**

|   |             |             |             |
|---|-------------|-------------|-------------|
| P | 1.07372400  | 0.60667300  | -3.38869800 |
| P | 1.95767900  | -1.42188000 | -0.63631400 |
| C | 0.62416700  | -0.07684500 | -5.03970900 |
| C | -0.56875600 | 0.31825300  | -5.66829500 |
| C | 1.42560900  | -1.04847400 | -5.66244700 |
| C | -0.94231700 | -0.23659100 | -6.89283600 |
| H | -1.20145500 | 1.06853700  | -5.20727200 |
| C | 1.04885900  | -1.59933200 | -6.88836200 |
| H | 2.34818500  | -1.38596500 | -5.20148700 |
| C | -0.13507800 | -1.19575400 | -7.50744800 |
| H | -1.86306400 | 0.08813900  | -7.36955200 |
| H | 1.68724100  | -2.34017800 | -7.36168800 |
| H | -0.42360100 | -1.62156300 | -8.46417800 |
| C | 0.46705000  | 2.34599900  | -3.41077300 |
| C | 0.74873700  | 3.19458600  | -4.49559400 |
| C | -0.23593700 | 2.85824700  | -2.31060300 |
| C | 0.33579200  | 4.52613900  | -4.47569600 |
| H | 1.28233600  | 2.81661800  | -5.36340200 |
| C | -0.64694600 | 4.19325400  | -2.29189900 |
| H | -0.46544300 | 2.20775100  | -1.47154500 |
| C | -0.36138600 | 5.02795100  | -3.37312200 |
| H | 0.55988900  | 5.17206900  | -5.31977300 |
| H | -1.18812600 | 4.57896200  | -1.43241900 |
| H | -0.67934900 | 6.06659100  | -3.35845200 |
| C | 1.76154600  | -2.29211800 | 0.98087500  |
| C | 1.70035000  | -1.56473500 | 2.18180100  |
| C | 1.61642600  | -3.68859700 | 1.02845900  |
| C | 1.50990200  | -2.21923900 | 3.39942500  |
| H | 1.80706700  | -0.48382900 | 2.17861400  |
| C | 1.42128500  | -4.33994300 | 2.24817700  |

|   |             |             |             |
|---|-------------|-------------|-------------|
| H | 1.67856900  | -4.27531600 | 0.11696000  |
| C | 1.36855100  | -3.60810900 | 3.43562400  |
| H | 1.47618500  | -1.64272300 | 4.31944800  |
| H | 1.32224700  | -5.42156100 | 2.26852300  |
| H | 1.22433700  | -4.11661100 | 4.38445500  |
| C | 2.91756600  | -2.63597700 | -1.63359500 |
| C | 4.19817300  | -3.05641300 | -1.23040600 |
| C | 2.35181100  | -3.18865700 | -2.79156800 |
| C | 4.90108000  | -3.99565300 | -1.98299900 |
| H | 4.64733100  | -2.66021200 | -0.32371600 |
| C | 3.05676700  | -4.13609000 | -3.54032000 |
| H | 1.35579100  | -2.88187400 | -3.09766500 |
| C | 4.33175500  | -4.53630200 | -3.14031600 |
| H | 5.89075800  | -4.30975500 | -1.66417800 |
| H | 2.60486500  | -4.56134800 | -4.43203900 |
| H | 4.88040200  | -5.27124000 | -3.72237400 |
| C | 2.91526200  | 0.84932000  | -3.53700700 |
| H | 3.39551600  | -0.10011300 | -3.79246900 |
| H | 3.09115400  | 1.53641400  | -4.37067800 |
| C | 3.18767800  | -0.09021500 | -0.16644200 |
| H | 2.62319500  | 0.73888400  | 0.27357900  |
| H | 3.82404900  | -0.49997100 | 0.62469600  |
| C | 3.55442400  | 1.44194500  | -2.28094900 |
| H | 2.86532900  | 2.14043600  | -1.77858500 |
| C | 4.11357800  | 0.44450800  | -1.25774700 |
| H | 4.58503400  | -0.39037200 | -1.79739900 |
| O | 4.73682300  | 2.12881200  | -2.67708400 |
| O | 5.10939100  | 1.22537900  | -0.60428000 |
| C | 5.62691400  | 2.18005200  | -1.55029600 |
| C | 7.01541100  | 1.76589300  | -2.02414300 |
| H | 7.36910400  | 2.44812500  | -2.80337500 |
| H | 7.72280400  | 1.78874300  | -1.18974100 |
| H | 6.98721100  | 0.75295500  | -2.43659100 |
| C | 5.59622800  | 3.55858700  | -0.89867500 |
| H | 6.20493800  | 3.56186700  | 0.01088700  |
| H | 5.98992900  | 4.31169700  | -1.58779600 |
| H | 4.57038000  | 3.82833200  | -0.63013700 |
| C | -5.04721400 | -1.07525800 | -3.29605600 |
| C | -4.06452100 | -0.08288000 | -3.32060600 |
| C | -4.32620100 | 1.20841400  | -3.78065400 |
| C | -5.61680800 | 1.48213600  | -4.23208900 |
| C | -6.60610500 | 0.48660100  | -4.21694200 |
| C | -6.33369700 | -0.80365700 | -3.74883100 |
| C | -4.45240200 | -2.33752400 | -2.73522100 |

|    |             |             |             |
|----|-------------|-------------|-------------|
| H  | -3.55033900 | 1.96786600  | -3.77588900 |
| H  | -5.86284800 | 2.47461400  | -4.59727000 |
| H  | -7.60457500 | 0.72353300  | -4.57257400 |
| H  | -7.11102900 | -1.56243100 | -3.73910700 |
| H  | -4.92627600 | -2.65519400 | -1.79895300 |
| N  | -3.04287000 | -1.95903700 | -2.47527300 |
| C  | -2.82173400 | -0.64861200 | -2.78784100 |
| O  | -1.74738000 | -0.01979000 | -2.64630300 |
| H  | -4.50335900 | -3.17796300 | -3.43231700 |
| C  | -1.01845400 | -2.40570100 | -1.16329100 |
| C  | -2.13446100 | -2.82803000 | -1.81877300 |
| H  | -3.29384000 | -1.33553700 | 0.15704500  |
| H  | -0.45994100 | -3.19937000 | -0.67813300 |
| C  | -2.43204700 | -4.28525000 | -1.92233600 |
| C  | -2.56230600 | -4.90824500 | -3.17728600 |
| C  | -2.54439300 | -5.07233800 | -0.76504200 |
| C  | -2.80324500 | -6.27814900 | -3.26802000 |
| H  | -2.44941100 | -4.31797000 | -4.08364900 |
| C  | -2.78219000 | -6.44455100 | -0.85824600 |
| H  | -2.45417400 | -4.60094900 | 0.20977300  |
| C  | -2.91556900 | -7.05063300 | -2.10846900 |
| H  | -2.89390800 | -6.74558200 | -4.24455600 |
| H  | -2.87251500 | -7.03763400 | 0.04743600  |
| H  | -3.10475800 | -8.11767900 | -2.18072600 |
| C  | -1.16598400 | -0.95425100 | 0.30509900  |
| C  | -2.61881100 | -0.51725800 | 0.43013900  |
| H  | -0.50357700 | -0.11570900 | 0.57056000  |
| H  | -0.92256300 | -1.76904100 | 0.98581200  |
| H  | -2.82774700 | 0.31914400  | -0.24523500 |
| C  | -2.92436000 | -0.08025900 | 1.87456600  |
| H  | -3.97157600 | 0.22764800  | 1.96958300  |
| H  | -2.74906800 | -0.89754400 | 2.58361300  |
| H  | -2.29831200 | 0.76702300  | 2.17803700  |
| Rh | -0.01221800 | -0.70712900 | -1.62363800 |

**TS7b**

|   |             |             |             |
|---|-------------|-------------|-------------|
| P | 0.98151800  | 0.59979800  | -3.12029700 |
| P | 2.24533400  | -1.41246000 | -0.52781400 |
| C | 0.37893400  | -0.09177300 | -4.72064200 |
| C | -0.88188100 | 0.26627900  | -5.22602500 |
| C | 1.14611600  | -1.03218400 | -5.42879800 |
| C | -1.35590700 | -0.29330300 | -6.41310000 |
| H | -1.48993500 | 0.99167000  | -4.69814900 |
| C | 0.66897700  | -1.58878900 | -6.61655200 |

|   |             |             |             |
|---|-------------|-------------|-------------|
| H | 2.11960000  | -1.34219500 | -5.06352000 |
| C | -0.58262100 | -1.22133400 | -7.11287000 |
| H | -2.32944300 | 0.00310700  | -6.79373500 |
| H | 1.28168300  | -2.30543300 | -7.15636800 |
| H | -0.95009100 | -1.65098600 | -8.04038100 |
| C | 0.30290100  | 2.31122500  | -3.04607200 |
| C | 0.35465000  | 3.16312000  | -4.16264300 |
| C | -0.21432600 | 2.80239600  | -1.83898200 |
| C | -0.10630800 | 4.47598200  | -4.06989200 |
| H | 0.74482000  | 2.80149000  | -5.10991200 |
| C | -0.67224200 | 4.11868700  | -1.74665600 |
| H | -0.25659400 | 2.14836300  | -0.97251200 |
| C | -0.61991700 | 4.95593200  | -2.86191300 |
| H | -0.06197500 | 5.12470800  | -4.94004600 |
| H | -1.06809900 | 4.48801800  | -0.80471900 |
| H | -0.97555600 | 5.97994800  | -2.79151600 |
| C | 2.33775300  | -2.30843500 | 1.08568600  |
| C | 2.45963100  | -1.60231200 | 2.29443500  |
| C | 2.24841800  | -3.70968400 | 1.12751400  |
| C | 2.49971800  | -2.28166500 | 3.51285100  |
| H | 2.53013300  | -0.51854200 | 2.29729000  |
| C | 2.28357000  | -4.38623300 | 2.34874800  |
| H | 2.17179000  | -4.27889400 | 0.20614300  |
| C | 2.40982000  | -3.67477900 | 3.54337400  |
| H | 2.60485200  | -1.72101900 | 4.43730300  |
| H | 2.22233700  | -5.47073900 | 2.36308900  |
| H | 2.44447800  | -4.20260100 | 4.49196300  |
| C | 3.10293200  | -2.57801600 | -1.66766600 |
| C | 4.44681700  | -2.94033400 | -1.46249400 |
| C | 2.39596700  | -3.15861600 | -2.73041800 |
| C | 5.07027300  | -3.84954200 | -2.31536500 |
| H | 5.00837300  | -2.52245000 | -0.63144500 |
| C | 3.02192300  | -4.07660400 | -3.57946900 |
| H | 1.35338500  | -2.89509100 | -2.88441200 |
| C | 4.35878900  | -4.41882100 | -3.37624300 |
| H | 6.10948400  | -4.11831400 | -2.14923600 |
| H | 2.46072000  | -4.52379100 | -4.39511900 |
| H | 4.84610000  | -5.13079200 | -4.03622400 |
| C | 2.77641400  | 0.93590400  | -3.49446700 |
| H | 3.26692800  | 0.01721000  | -3.83011700 |
| H | 2.80772600  | 1.64518300  | -4.32756900 |
| C | 3.49030200  | -0.04504900 | -0.20642900 |
| H | 2.97046600  | 0.76104900  | 0.32302300  |
| H | 4.23811300  | -0.44852200 | 0.48402800  |

|   |             |             |             |
|---|-------------|-------------|-------------|
| C | 3.53836800  | 1.53647800  | -2.31537500 |
| H | 2.88581600  | 2.19538400  | -1.71952300 |
| C | 4.25259300  | 0.54020300  | -1.39383200 |
| H | 4.67702700  | -0.26735300 | -2.00880600 |
| O | 4.63618800  | 2.27911600  | -2.83472300 |
| O | 5.29903600  | 1.34020500  | -0.85184100 |
| C | 5.66344100  | 2.33066300  | -1.83103200 |
| C | 6.98932200  | 1.96977500  | -2.49145200 |
| H | 7.21939800  | 2.67990600  | -3.29175300 |
| H | 7.79845500  | 1.99576600  | -1.75543300 |
| H | 6.93529300  | 0.96597800  | -2.92319300 |
| C | 5.68082900  | 3.69243200  | -1.14470900 |
| H | 6.40619100  | 3.69476900  | -0.32514300 |
| H | 5.95620800  | 4.47323500  | -1.85997800 |
| H | 4.69279000  | 3.92235300  | -0.73471700 |
| C | -5.02756200 | -1.29614000 | -2.47561300 |
| C | -4.06683600 | -0.29609000 | -2.64544700 |
| C | -4.39229100 | 0.96523800  | -3.14608200 |
| C | -5.72340500 | 1.19934100  | -3.48934100 |
| C | -6.69054000 | 0.19484800  | -3.32985600 |
| C | -6.35468600 | -1.06439400 | -2.82048800 |
| C | -4.36462300 | -2.51841500 | -1.90220200 |
| H | -3.63313400 | 1.73416400  | -3.25101300 |
| H | -6.01851200 | 2.16806200  | -3.88103600 |
| H | -7.72134500 | 0.40057800  | -3.60311200 |
| H | -7.11517000 | -1.83024700 | -2.69703000 |
| H | -4.74802800 | -2.78850200 | -0.91107100 |
| N | -2.94481900 | -2.10866800 | -1.79091800 |
| C | -2.77181000 | -0.81760100 | -2.19718500 |
| O | -1.69810000 | -0.17374500 | -2.17982500 |
| H | -4.46425200 | -3.39739300 | -2.54439700 |
| C | -0.80298200 | -2.45319500 | -0.64266500 |
| C | -1.96212300 | -2.92780600 | -1.17655500 |
| H | -2.07410900 | 0.78014700  | 0.08977600  |
| H | -0.19089300 | -3.21387900 | -0.16891700 |
| C | -2.22378400 | -4.39621000 | -1.22294700 |
| C | -2.45212000 | -5.04183100 | -2.45278200 |
| C | -2.20043100 | -5.17130100 | -0.05268400 |
| C | -2.65786400 | -6.41934700 | -2.50596200 |
| H | -2.44291700 | -4.46126800 | -3.37236800 |
| C | -2.40435400 | -6.55106000 | -0.10827100 |
| H | -2.02960700 | -4.68800400 | 0.90455900  |
| C | -2.63697000 | -7.17889600 | -1.33280100 |
| H | -2.82487600 | -6.90228000 | -3.46474500 |

|    |             |             |             |
|----|-------------|-------------|-------------|
| H  | -2.38966200 | -7.13364400 | 0.80860900  |
| H  | -2.79881500 | -8.25203900 | -1.37477100 |
| C  | -2.14191400 | -0.04876900 | 0.79523700  |
| C  | -0.87594300 | -0.88847700 | 0.86839500  |
| H  | -2.32330400 | 0.37461200  | 1.79453700  |
| H  | -3.02029400 | -0.65393400 | 0.54849500  |
| H  | -0.00779400 | -0.25520100 | 1.07437100  |
| C  | -0.98532400 | -1.94362900 | 1.96601300  |
| H  | -1.00869900 | -1.42047700 | 2.93332400  |
| H  | -1.91338100 | -2.51712600 | 1.87943600  |
| H  | -0.14629800 | -2.63807700 | 1.99920100  |
| Rh | 0.14179800  | -0.77357200 | -1.26319100 |

**TS8a**

|   |             |             |             |
|---|-------------|-------------|-------------|
| P | 1.80458200  | 1.08220700  | 0.06379900  |
| P | -0.79844400 | -1.34535200 | 0.51597300  |
| C | 3.44399900  | 0.24800300  | -0.09064200 |
| C | 4.43372900  | 0.43415600  | 0.88972200  |
| C | 3.75005200  | -0.53109600 | -1.21645900 |
| C | 5.68751500  | -0.16140200 | 0.75451700  |
| H | 4.23644500  | 1.05007700  | 1.76154200  |
| C | 5.00982200  | -1.11887200 | -1.35630800 |
| H | 2.99711400  | -0.69004000 | -1.98243800 |
| C | 5.97904700  | -0.93932300 | -0.36859000 |
| H | 6.43845400  | -0.01281200 | 1.52518400  |
| H | 5.22994000  | -1.71767300 | -2.23570000 |
| H | 6.95767000  | -1.39868100 | -0.47419200 |
| C | 2.26293500  | 2.84877900  | -0.23266700 |
| C | 3.22885700  | 3.16632200  | -1.20235600 |
| C | 1.64857200  | 3.89487200  | 0.47705400  |
| C | 3.56862900  | 4.49441500  | -1.46023200 |
| H | 3.73520300  | 2.37525300  | -1.74715900 |
| C | 1.99397800  | 5.22303400  | 0.21629800  |
| H | 0.92406400  | 3.69048100  | 1.25794600  |
| C | 2.94947600  | 5.52754500  | -0.75419300 |
| H | 4.32503600  | 4.71974600  | -2.20675000 |
| H | 1.52189500  | 6.01948500  | 0.78493100  |
| H | 3.21834500  | 6.56137700  | -0.95089200 |
| C | -2.01413100 | -2.61875100 | -0.03730100 |
| C | -3.38409100 | -2.54115000 | 0.24637000  |
| C | -1.53666000 | -3.71237100 | -0.78079100 |
| C | -4.25488400 | -3.54441700 | -0.18728600 |
| H | -3.78796400 | -1.70562800 | 0.80876700  |
| C | -2.40821100 | -4.70862500 | -1.21662600 |



|   |             |             |             |
|---|-------------|-------------|-------------|
| H | -0.47595400 | -3.80006200 | -1.00091300 |
| C | -3.77123000 | -4.62841100 | -0.91800200 |
| H | -5.31301400 | -3.47172100 | 0.04561500  |
| H | -2.02137700 | -5.55268200 | -1.78075400 |
| H | -4.44983700 | -5.40788200 | -1.25192300 |
| C | 0.42686400  | -2.41395500 | 1.39338800  |
| C | 0.09506300  | -3.03268800 | 2.61292900  |
| C | 1.67348100  | -2.68818400 | 0.81544600  |
| C | 1.00027900  | -3.88402800 | 3.24401300  |
| H | -0.87567500 | -2.86403400 | 3.06991200  |
| C | 2.57868400  | -3.54563600 | 1.44733900  |
| H | 1.94262900  | -2.23072300 | -0.12935600 |
| C | 2.24618900  | -4.14041900 | 2.66360000  |
| H | 0.73077800  | -4.35197300 | 4.18655300  |
| H | 3.54277200  | -3.74002700 | 0.98634700  |
| H | 2.94953500  | -4.80472300 | 3.15744300  |
| C | 1.47885900  | 1.05788500  | 1.89935700  |
| H | 1.72254400  | 0.05355200  | 2.26052700  |
| H | 2.16680400  | 1.75348600  | 2.38776500  |
| C | -1.70276400 | -0.45090000 | 1.87527200  |
| H | -2.38332700 | 0.25441500  | 1.38733300  |
| H | -2.31462100 | -1.16076000 | 2.44103600  |
| C | 0.04583900  | 1.45478900  | 2.30403400  |
| H | -0.48834500 | 1.94754900  | 1.48164700  |
| C | -0.83389800 | 0.32686000  | 2.86472100  |
| H | -0.20597000 | -0.36597300 | 3.44456800  |
| O | 0.13895300  | 2.33874000  | 3.42317300  |
| O | -1.71780300 | 1.02982100  | 3.73135700  |
| C | -1.05098900 | 2.20585500  | 4.21736200  |
| C | -0.63200800 | 2.02369600  | 5.67225400  |
| H | -0.05976500 | 2.89135900  | 6.01515200  |
| H | -1.51425800 | 1.91033300  | 6.30940900  |
| H | -0.00580600 | 1.13249000  | 5.77398100  |
| C | -1.97876400 | 3.39773100  | 4.00093100  |
| H | -2.91604700 | 3.25332800  | 4.54724300  |
| H | -1.50433900 | 4.31778600  | 4.35583600  |
| H | -2.21155500 | 3.50398000  | 2.93662300  |
| C | -3.93191500 | 3.64525600  | -2.42063100 |
| C | -2.94498900 | 3.60658500  | -1.43346900 |
| C | -2.59934800 | 4.73455400  | -0.68812300 |
| C | -3.28436400 | 5.91900000  | -0.95381500 |
| C | -4.27889500 | 5.96248700  | -1.94381200 |
| C | -4.61267200 | 4.82811300  | -2.69096000 |
| C | -4.05982400 | 2.28171200  | -3.04080500 |

|    |             |             |             |
|----|-------------|-------------|-------------|
| H  | -1.81892400 | 4.68348800  | 0.06447600  |
| H  | -3.04770300 | 6.81898000  | -0.39446900 |
| H  | -4.79875000 | 6.89684900  | -2.13444600 |
| H  | -5.38204300 | 4.87803800  | -3.45623400 |
| H  | -5.06376300 | 1.86163900  | -2.94164400 |
| N  | -3.07202500 | 1.47556500  | -2.28488100 |
| C  | -2.38519800 | 2.24856100  | -1.37617500 |
| O  | -1.45463200 | 1.87430200  | -0.63779600 |
| H  | -3.80464300 | 2.27454300  | -4.10811500 |
| C  | -1.65124600 | -0.49335100 | -2.47677600 |
| C  | -2.88219200 | 0.08351700  | -2.52291700 |
| H  | -1.62591900 | -1.56089000 | -2.67056900 |
| C  | -4.11219900 | -0.68495600 | -2.84631700 |
| C  | -4.11018600 | -1.62857700 | -3.88748000 |
| C  | -5.30083600 | -0.49843600 | -2.11436200 |
| C  | -5.25699600 | -2.36352200 | -4.18625100 |
| H  | -3.20863100 | -1.77340300 | -4.47578700 |
| C  | -6.44708500 | -1.23073400 | -2.41649900 |
| H  | -5.31672500 | 0.20946000  | -1.28925800 |
| C  | -6.43013800 | -2.16533500 | -3.45558700 |
| H  | -5.23721800 | -3.08210700 | -5.00065000 |
| H  | -7.35363300 | -1.07495200 | -1.83818200 |
| H  | -7.32564800 | -2.73115500 | -3.69545000 |
| C  | -0.29057100 | 0.40365600  | -3.64721000 |
| C  | 0.63386300  | 1.30945100  | -3.04561300 |
| H  | 0.09235300  | -0.52737300 | -4.05567200 |
| H  | -1.08582700 | 0.85277700  | -4.23294000 |
| H  | 1.67930300  | 1.01358700  | -3.07748000 |
| C  | 0.37836300  | 2.79935000  | -3.13333700 |
| H  | 1.02802600  | 3.24615400  | -3.89772700 |
| H  | -0.65713100 | 3.00810500  | -3.42243600 |
| H  | 0.57812200  | 3.32466800  | -2.19708000 |
| H  | 0.88243400  | -0.97853800 | -1.66301700 |
| Rh | -0.03842200 | 0.19051600  | -1.23471800 |

**TS8b**

|   |             |             |             |
|---|-------------|-------------|-------------|
| P | 1.79571000  | 1.12141700  | 0.00022900  |
| P | -0.83595800 | -1.24947900 | 0.52448500  |
| C | 3.42191600  | 0.26702600  | -0.17434600 |
| C | 4.38400300  | 0.29723400  | 0.85012100  |
| C | 3.73613500  | -0.40318500 | -1.36769900 |
| C | 5.61872400  | -0.33346600 | 0.68631000  |
| H | 4.18410100  | 0.81580500  | 1.78168100  |
| C | 4.97255800  | -1.02893000 | -1.53276500 |

|   |             |             |             |
|---|-------------|-------------|-------------|
| H | 3.00445700  | -0.44960200 | -2.16712800 |
| C | 5.91642600  | -0.99826700 | -0.50438700 |
| H | 6.34722000  | -0.30239700 | 1.49146600  |
| H | 5.19577300  | -1.54276900 | -2.46356000 |
| H | 6.87787300  | -1.48771300 | -0.63048700 |
| C | 2.17495900  | 2.88666100  | -0.40375700 |
| C | 3.48793400  | 3.34981600  | -0.57883900 |
| C | 1.11305500  | 3.80161000  | -0.50966300 |
| C | 3.73219000  | 4.69971200  | -0.84234100 |
| H | 4.32519400  | 2.66381900  | -0.51188300 |
| C | 1.36289600  | 5.14991700  | -0.76647700 |
| H | 0.09039600  | 3.45323800  | -0.40895000 |
| C | 2.67327700  | 5.60326200  | -0.93303900 |
| H | 4.75439200  | 5.04168000  | -0.97781500 |
| H | 0.53138200  | 5.84524300  | -0.84471900 |
| H | 2.86691400  | 6.65232900  | -1.13770400 |
| C | -2.12842200 | -2.47646600 | 0.05007000  |
| C | -3.47652300 | -2.35258200 | 0.41203700  |
| C | -1.73045500 | -3.59030200 | -0.70988100 |
| C | -4.40191900 | -3.33151400 | 0.04018500  |
| H | -3.82014300 | -1.50134100 | 0.99090600  |
| C | -2.65636500 | -4.56232200 | -1.08355600 |
| H | -0.68713400 | -3.71278400 | -0.98932400 |
| C | -3.99611800 | -4.43667900 | -0.70623500 |
| H | -5.44122300 | -3.22619200 | 0.33765400  |
| H | -2.33009900 | -5.42295500 | -1.66076400 |
| H | -4.71698500 | -5.19727100 | -0.99149400 |
| C | 0.37350800  | -2.34319400 | 1.39040500  |
| C | 0.02548100  | -2.97356200 | 2.59967000  |
| C | 1.62533500  | -2.61539700 | 0.82277100  |
| C | 0.91988100  | -3.83535900 | 3.23133600  |
| H | -0.94991100 | -2.80456100 | 3.04726200  |
| C | 2.51976900  | -3.48395100 | 1.45568200  |
| H | 1.90629800  | -2.14950500 | -0.11494700 |
| C | 2.17108600  | -4.09067000 | 2.66131700  |
| H | 0.63847600  | -4.31255500 | 4.16573700  |
| H | 3.48762400  | -3.67890800 | 1.00287200  |
| H | 2.86583400  | -4.76409000 | 3.15508400  |
| C | 1.57050900  | 1.19099100  | 1.85471700  |
| H | 1.84925900  | 0.21492300  | 2.26631100  |
| H | 2.27450100  | 1.93019100  | 2.24765000  |
| C | -1.64822100 | -0.27196100 | 1.88596400  |
| H | -2.29416900 | 0.46658300  | 1.40086400  |
| H | -2.28921600 | -0.93382500 | 2.47708700  |

|   |             |             |             |
|---|-------------|-------------|-------------|
| C | 0.16757100  | 1.59488300  | 2.33323300  |
| H | -0.37896100 | 2.16162800  | 1.56698100  |
| C | -0.71945200 | 0.45283800  | 2.85953600  |
| H | -0.08203700 | -0.27446600 | 3.38496500  |
| O | 0.33258600  | 2.39041000  | 3.50681300  |
| O | -1.55761900 | 1.12911200  | 3.79159500  |
| C | -0.82312000 | 2.23296800  | 4.34343700  |
| C | -0.34722500 | 1.91193100  | 5.75689200  |
| H | 0.28073600  | 2.72268000  | 6.13927600  |
| H | -1.20366500 | 1.78518600  | 6.42602300  |
| H | 0.24066100  | 0.98919100  | 5.75634000  |
| C | -1.71074600 | 3.47198300  | 4.27496800  |
| H | -2.62609000 | 3.31594000  | 4.85435800  |
| H | -1.18187300 | 4.34007700  | 4.67982500  |
| H | -1.98809200 | 3.67802000  | 3.23652000  |
| C | -4.10912900 | 3.52783900  | -2.50472300 |
| C | -3.14592700 | 3.52586600  | -1.49383600 |
| C | -2.88769600 | 4.65769700  | -0.71833400 |
| C | -3.62462300 | 5.80954300  | -0.98874000 |
| C | -4.58786100 | 5.81785700  | -2.01007500 |
| C | -4.84233700 | 4.67796900  | -2.77936500 |
| C | -4.16330200 | 2.16452400  | -3.13470700 |
| H | -2.14464300 | 4.63285600  | 0.07272600  |
| H | -3.45677600 | 6.70934100  | -0.40479900 |
| H | -5.14957500 | 6.72696800  | -2.20379600 |
| H | -5.59393100 | 4.69777400  | -3.56341800 |
| H | -5.15058500 | 1.70262000  | -3.05905900 |
| N | -3.15811100 | 1.39627700  | -2.36136300 |
| C | -2.51699900 | 2.19680000  | -1.44057300 |
| O | -1.57612600 | 1.86589100  | -0.69397600 |
| H | -3.88559500 | 2.17266700  | -4.19640500 |
| C | -1.62138000 | -0.47806400 | -2.55489700 |
| C | -2.88397100 | 0.02231300  | -2.62603900 |
| H | -1.52485800 | -1.53362900 | -2.79228700 |
| C | -4.06231000 | -0.79787500 | -3.01275600 |
| C | -3.97895800 | -1.71477700 | -4.07404800 |
| C | -5.28405900 | -0.68580000 | -2.32171700 |
| C | -5.07917300 | -2.49135700 | -4.43553300 |
| H | -3.05070100 | -1.80714100 | -4.62998200 |
| C | -6.38383400 | -1.45980000 | -2.68570800 |
| H | -5.36233900 | -0.00506300 | -1.47781000 |
| C | -6.28688100 | -2.36374000 | -3.74690100 |
| H | -4.99577900 | -3.18726600 | -5.26543800 |
| H | -7.31648800 | -1.36118100 | -2.13719800 |

|    |             |             |             |
|----|-------------|-------------|-------------|
| H  | -7.14631300 | -2.96202500 | -4.03498900 |
| C  | 0.65195900  | 1.32941000  | -2.97687500 |
| C  | -0.36796600 | 0.67321900  | -3.72710400 |
| H  | 0.51770800  | 2.38401900  | -2.75225500 |
| H  | 1.68250900  | 1.04114600  | -3.16954900 |
| H  | -1.20644300 | 1.30889700  | -3.99707400 |
| C  | 0.00642000  | -0.36231500 | -4.76384600 |
| H  | 0.45756700  | 0.16125500  | -5.61753200 |
| H  | 0.74464100  | -1.06974200 | -4.37523700 |
| H  | -0.85665100 | -0.92056300 | -5.13466000 |
| H  | 0.87401500  | -0.94168600 | -1.68326100 |
| Rh | -0.05452800 | 0.21229300  | -1.25222700 |

**INT10a**

|   |             |             |             |
|---|-------------|-------------|-------------|
| P | 1.87408700  | 1.45189700  | -0.00666500 |
| P | -1.53981000 | 0.72966000  | 1.06250100  |
| C | 3.37952000  | 1.24119800  | -1.05102900 |
| C | 3.77345900  | -0.05730900 | -1.41775200 |
| C | 4.12058800  | 2.33456500  | -1.52118800 |
| C | 4.89553800  | -0.25582900 | -2.22072400 |
| H | 3.20486500  | -0.92048800 | -1.08188900 |
| C | 5.24193000  | 2.13176300  | -2.33003400 |
| H | 3.83329900  | 3.34632400  | -1.25505700 |
| C | 5.63324700  | 0.83940600  | -2.67866800 |
| H | 5.19445300  | -1.26549700 | -2.48764900 |
| H | 5.80879500  | 2.98809800  | -2.68391500 |
| H | 6.50746500  | 0.68402200  | -3.30411300 |
| C | 2.03366700  | 3.13257600  | 0.72075700  |
| C | 3.16668800  | 3.49956800  | 1.46917100  |
| C | 1.00545300  | 4.06976300  | 0.54326600  |
| C | 3.26109400  | 4.77431300  | 2.02639500  |
| H | 3.98059500  | 2.79471200  | 1.61455200  |
| C | 1.10304800  | 5.34802500  | 1.09908200  |
| H | 0.12553000  | 3.80541800  | -0.03685900 |
| C | 2.22997700  | 5.70024500  | 1.84232000  |
| H | 4.14071900  | 5.04536500  | 2.60288300  |
| H | 0.30215600  | 6.06579900  | 0.94662900  |
| H | 2.30812900  | 6.69321100  | 2.27530500  |
| C | -2.95891200 | 1.91218800  | 1.09014400  |
| C | -2.72291300 | 3.25801500  | 1.42350100  |
| C | -4.26113900 | 1.52813300  | 0.73615100  |
| C | -3.76342700 | 4.18728800  | 1.42264400  |
| H | -1.72528400 | 3.59101700  | 1.69632500  |
| C | -5.30247500 | 2.45971900  | 0.74069800  |

|   |             |             |             |
|---|-------------|-------------|-------------|
| H | -4.47175400 | 0.49833300  | 0.46769600  |
| C | -5.05873600 | 3.79025400  | 1.08404000  |
| H | -3.56296300 | 5.21976800  | 1.69503800  |
| H | -6.30713200 | 2.13914300  | 0.47867100  |
| H | -5.87084500 | 4.51147600  | 1.09218200  |
| C | -2.28953600 | -0.94264400 | 1.25480300  |
| C | -3.23607500 | -1.21459700 | 2.25947200  |
| C | -1.83698200 | -1.99682100 | 0.44823300  |
| C | -3.71577300 | -2.50946300 | 2.44928400  |
| H | -3.60668800 | -0.41464500 | 2.89411000  |
| C | -2.31009300 | -3.29697300 | 0.64802900  |
| H | -1.10750600 | -1.80091400 | -0.33228600 |
| C | -3.24925500 | -3.55439300 | 1.64667600  |
| H | -4.44744100 | -2.70407500 | 3.22826000  |
| H | -1.93984700 | -4.10310700 | 0.02183000  |
| H | -3.61598200 | -4.56491500 | 1.80351000  |
| C | 2.28963700  | 0.28354600  | 1.39738700  |
| H | 2.01414400  | -0.72845800 | 1.08243900  |
| H | 3.38024100  | 0.30198300  | 1.49149200  |
| C | -0.85662400 | 0.98613100  | 2.78694600  |
| H | -0.56395900 | 2.03352200  | 2.91494600  |
| H | -1.66438800 | 0.78922000  | 3.49856900  |
| C | 1.71824600  | 0.57655100  | 2.78535900  |
| H | 1.76928900  | 1.65332000  | 3.00431800  |
| C | 0.31310200  | 0.06590200  | 3.12534700  |
| H | 0.16835700  | -0.93247400 | 2.68142800  |
| O | 2.52252100  | -0.14501600 | 3.71471900  |
| O | 0.38896900  | -0.04083900 | 4.54362600  |
| C | 1.73546200  | -0.39458400 | 4.89519100  |
| C | 1.83722900  | -1.87973700 | 5.22768200  |
| H | 2.88091600  | -2.15821100 | 5.40385700  |
| H | 1.25624600  | -2.10709100 | 6.12654800  |
| H | 1.45307900  | -2.48110500 | 4.39819100  |
| C | 2.18102600  | 0.51249800  | 6.03652300  |
| H | 1.52487800  | 0.38134000  | 6.90257000  |
| H | 3.20645200  | 0.27262100  | 6.33327800  |
| H | 2.13819700  | 1.56013500  | 5.72402700  |
| C | -4.49130200 | -0.19691700 | -4.40421100 |
| C | -4.07842100 | 0.64928500  | -3.37228600 |
| C | -4.89278600 | 1.67367800  | -2.88893700 |
| C | -6.15280800 | 1.82508600  | -3.46703500 |
| C | -6.57569000 | 0.97100000  | -4.49702700 |
| C | -5.74995300 | -0.05025000 | -4.97803400 |
| C | -3.38384800 | -1.16429300 | -4.71255200 |

|    |             |             |             |
|----|-------------|-------------|-------------|
| H  | -4.55250400 | 2.32251300  | -2.08943100 |
| H  | -6.81498100 | 2.61285100  | -3.12039400 |
| H  | -7.56139200 | 1.10815600  | -4.93217000 |
| H  | -6.08649100 | -0.70106000 | -5.78008800 |
| H  | -3.67068500 | -2.21196100 | -4.57282600 |
| N  | -2.33039200 | -0.78372500 | -3.74760400 |
| C  | -2.71126400 | 0.27304900  | -2.96601200 |
| O  | -2.05611900 | 0.84243900  | -2.06781700 |
| H  | -2.99864700 | -1.05701100 | -5.73427300 |
| C  | 0.06550900  | -0.63626000 | -3.94316100 |
| C  | -1.03832400 | -1.39508400 | -3.80412300 |
| H  | 1.02453600  | -1.14877700 | -3.90886500 |
| C  | -1.01937000 | -2.87893800 | -3.73816900 |
| C  | -0.06215200 | -3.61456600 | -4.45867200 |
| C  | -1.95942400 | -3.58343400 | -2.96549100 |
| C  | -0.02718100 | -5.00608800 | -4.38488100 |
| H  | 0.64158900  | -3.09255600 | -5.10032600 |
| C  | -1.93018600 | -4.97679900 | -2.90151300 |
| H  | -2.70567000 | -3.03499300 | -2.39763800 |
| C  | -0.96146700 | -5.69381500 | -3.60704800 |
| H  | 0.71867300  | -5.55525900 | -4.95247800 |
| H  | -2.66771100 | -5.50299800 | -2.30138100 |
| H  | -0.94242800 | -6.77875300 | -3.56134300 |
| C  | 0.11109400  | 0.85087800  | -4.11782200 |
| C  | 0.73143100  | 1.60492700  | -2.92696200 |
| H  | 0.73237300  | 1.06997100  | -5.00291300 |
| H  | -0.88300700 | 1.24629300  | -4.34607000 |
| H  | 1.79831200  | 1.38064300  | -2.90843700 |
| C  | 0.51794700  | 3.11355700  | -3.06589000 |
| H  | 0.79621700  | 3.45620300  | -4.07515600 |
| H  | -0.53612000 | 3.39333700  | -2.92438600 |
| H  | 1.12236500  | 3.68981500  | -2.35716100 |
| H  | 0.45808200  | -0.30407900 | -1.27744700 |
| Rh | -0.12896800 | 1.08901500  | -1.06665100 |

**INT10b**

|   |             |             |             |
|---|-------------|-------------|-------------|
| P | -1.49030600 | -0.47788400 | 0.70941300  |
| P | 1.44627900  | -2.06152000 | -0.80653800 |
| C | -2.54206900 | 1.01802800  | 0.97032300  |
| C | -1.95408100 | 2.19235000  | 1.46983500  |
| C | -3.90948200 | 1.02808500  | 0.65638700  |
| C | -2.72272300 | 3.33762800  | 1.67618400  |
| H | -0.89295900 | 2.21943300  | 1.70035900  |
| C | -4.67394400 | 2.18166000  | 0.85175600  |

|   |             |             |             |
|---|-------------|-------------|-------------|
| H | -4.38802300 | 0.12991000  | 0.27925900  |
| C | -4.08522000 | 3.33648100  | 1.36686300  |
| H | -2.25664300 | 4.23127100  | 2.08215700  |
| H | -5.73414700 | 2.16942200  | 0.61389100  |
| H | -4.68280900 | 4.22875900  | 1.52961600  |
| C | -2.71132300 | -1.86064400 | 0.66128300  |
| C | -3.48757200 | -2.21215600 | 1.78087600  |
| C | -2.88302600 | -2.58113000 | -0.52954100 |
| C | -4.39488300 | -3.26863200 | 1.71135300  |
| H | -3.39264200 | -1.65795400 | 2.71023000  |
| C | -3.79799100 | -3.63584900 | -0.60129200 |
| H | -2.31297900 | -2.30757900 | -1.41219200 |
| C | -4.54956800 | -3.98485100 | 0.52049200  |
| H | -4.98301300 | -3.53156200 | 2.58597400  |
| H | -3.92579200 | -4.17377800 | -1.53612100 |
| H | -5.25734600 | -4.80732800 | 0.46931800  |
| C | 1.27442100  | -3.21342000 | -2.23369200 |
| C | 0.13342400  | -4.02596900 | -2.34916500 |
| C | 2.23668400  | -3.24947100 | -3.25745500 |
| C | -0.03512700 | -4.85900800 | -3.45638900 |
| H | -0.62839700 | -4.02118400 | -1.57646500 |
| C | 2.06324800  | -4.08268300 | -4.36404800 |
| H | 3.13334900  | -2.64303700 | -3.18436900 |
| C | 0.92783300  | -4.88894700 | -4.46690500 |
| H | -0.91648100 | -5.49051400 | -3.52339400 |
| H | 2.82201700  | -4.10644800 | -5.14102800 |
| H | 0.79832300  | -5.54165100 | -5.32534800 |
| C | 3.26219000  | -1.88717000 | -0.54527400 |
| C | 4.06858200  | -3.04013700 | -0.51821300 |
| C | 3.85469400  | -0.64129600 | -0.29517600 |
| C | 5.43337400  | -2.94337900 | -0.25294700 |
| H | 3.63681900  | -4.01756900 | -0.71372200 |
| C | 5.22210000  | -0.54768100 | -0.02633300 |
| H | 3.24863400  | 0.25778500  | -0.31646200 |
| C | 6.01303400  | -1.69628900 | -0.00570700 |
| H | 6.04280900  | -3.84222700 | -0.23701800 |
| H | 5.66595400  | 0.42515800  | 0.16434800  |
| H | 7.07659100  | -1.62244700 | 0.20205200  |
| C | -0.72620400 | -0.64145400 | 2.41407000  |
| H | 0.04211600  | 0.13408000  | 2.50122400  |
| H | -1.49050400 | -0.41853400 | 3.16548300  |
| C | 0.97744100  | -3.11744300 | 0.65252400  |
| H | -0.05242900 | -3.47036200 | 0.53671800  |
| H | 1.62712300  | -3.99777200 | 0.63433800  |



|   |             |             |             |
|---|-------------|-------------|-------------|
| C | -0.11261100 | -1.99895500 | 2.74147700  |
| H | -0.86373700 | -2.79380900 | 2.61461300  |
| C | 1.16724500  | -2.41161000 | 2.00377100  |
| H | 1.83153200  | -1.53783700 | 1.90821100  |
| O | 0.33134300  | -1.96066900 | 4.09296300  |
| O | 1.73081300  | -3.34669100 | 2.91785300  |
| C | 1.36531100  | -2.94836800 | 4.25178700  |
| C | 2.54422400  | -2.28991600 | 4.95978500  |
| H | 2.23408000  | -1.91049400 | 5.93836200  |
| H | 3.35246700  | -3.01333800 | 5.10304000  |
| H | 2.92094500  | -1.45172600 | 4.36600400  |
| C | 0.83028700  | -4.17599500 | 4.98109400  |
| H | 1.59597600  | -4.95698500 | 5.02162600  |
| H | 0.54206000  | -3.91332200 | 6.00337200  |
| H | -0.04421000 | -4.57472300 | 4.45837500  |
| C | -2.66745700 | 3.76930600  | -3.58722000 |
| C | -1.83862100 | 3.67966700  | -2.46571400 |
| C | -1.53734200 | 4.79071700  | -1.67827800 |
| C | -2.09550700 | 6.01405400  | -2.04642000 |
| C | -2.93117200 | 6.10897500  | -3.16988900 |
| C | -3.22812900 | 4.98860000  | -3.95305700 |
| C | -2.78532700 | 2.41040800  | -4.22474500 |
| H | -0.89049700 | 4.69514800  | -0.81260900 |
| H | -1.88263100 | 6.90403000  | -1.46200600 |
| H | -3.35440800 | 7.07261700  | -3.43820100 |
| H | -3.87472300 | 5.07795000  | -4.82142000 |
| H | -3.81465900 | 2.03772300  | -4.25755300 |
| N | -1.95258400 | 1.56557600  | -3.34428800 |
| C | -1.38373500 | 2.28747400  | -2.32497300 |
| O | -0.62778400 | 1.85091300  | -1.43777500 |
| H | -2.38694300 | 2.38505200  | -5.24689800 |
| C | -0.42813000 | -0.24945300 | -3.79782500 |
| C | -1.70139300 | 0.18990300  | -3.62844100 |
| H | -0.29174300 | -1.31604000 | -3.96529900 |
| C | -2.90735200 | -0.66001900 | -3.80473900 |
| C | -2.90225400 | -1.72741600 | -4.72023300 |
| C | -4.08860400 | -0.39740600 | -3.08720100 |
| C | -4.03589100 | -2.51978500 | -4.89617600 |
| H | -2.01649100 | -1.91690900 | -5.31871700 |
| C | -5.22352800 | -1.18562700 | -3.27076500 |
| H | -4.10945900 | 0.41780600  | -2.36923500 |
| C | -5.20154500 | -2.25064900 | -4.17450100 |
| H | -4.01614400 | -3.33285700 | -5.61633200 |
| H | -6.12580100 | -0.96992100 | -2.70565500 |

|    |             |             |             |
|----|-------------|-------------|-------------|
| H  | -6.08951100 | -2.85787300 | -4.32471300 |
| C  | 1.64236300  | 0.43455200  | -2.58728800 |
| C  | 0.82012900  | 0.60888900  | -3.87862500 |
| H  | 2.44227900  | -0.29515500 | -2.73273900 |
| H  | 2.09523800  | 1.37504300  | -2.26017700 |
| H  | 1.16917200  | 0.39779600  | -0.01983100 |
| H  | 0.50857300  | 1.65568500  | -3.95649500 |
| C  | 1.62352600  | 0.26330200  | -5.14657100 |
| H  | 2.52432700  | 0.88427100  | -5.20413600 |
| H  | 1.93707800  | -0.78713100 | -5.13793500 |
| H  | 1.03308200  | 0.43393200  | -6.05499900 |
| Rh | 0.24473500  | -0.14042700 | -1.11752000 |

**TS9a**

|   |             |             |             |
|---|-------------|-------------|-------------|
| P | 1.85839300  | 1.42485700  | 0.08796500  |
| P | -1.48890000 | 0.80487900  | 1.04094000  |
| C | 3.35198300  | 1.20432000  | -0.97737600 |
| C | 3.73678600  | -0.09728500 | -1.34424700 |
| C | 4.09437400  | 2.29180000  | -1.45867000 |
| C | 4.84894300  | -0.30388900 | -2.15916000 |
| H | 3.16798800  | -0.95658800 | -0.99849100 |
| C | 5.20526800  | 2.08125800  | -2.28072700 |
| H | 3.81662300  | 3.30576000  | -1.19063700 |
| C | 5.58655700  | 0.78622500  | -2.62994500 |
| H | 5.14080200  | -1.31602600 | -2.42484600 |
| H | 5.77206300  | 2.93394700  | -2.64361400 |
| H | 6.45306300  | 0.62459200  | -3.26452500 |
| C | 2.03527500  | 3.12390100  | 0.77668000  |
| C | 3.15680900  | 3.49118700  | 1.54221000  |
| C | 1.03619600  | 4.07913500  | 0.53774000  |
| C | 3.26709300  | 4.78131300  | 2.05994600  |
| H | 3.95128200  | 2.77483300  | 1.73213600  |
| C | 1.14993300  | 5.37278800  | 1.05446200  |
| H | 0.17210000  | 3.80936200  | -0.06267700 |
| C | 2.26345900  | 5.72395300  | 1.81803200  |
| H | 4.13767800  | 5.05127000  | 2.65062700  |
| H | 0.37146700  | 6.10395400  | 0.85542400  |
| H | 2.35335200  | 6.72857400  | 2.22097300  |
| C | -2.93204600 | 1.95613600  | 1.05958400  |
| C | -2.71407700 | 3.31223200  | 1.36091200  |
| C | -4.23675300 | 1.53215400  | 0.76827100  |
| C | -3.77659700 | 4.21522800  | 1.38807200  |
| H | -1.71401000 | 3.67215500  | 1.58603300  |
| C | -5.30012800 | 2.43837200  | 0.80199700  |

|   |             |             |             |
|---|-------------|-------------|-------------|
| H | -4.43193600 | 0.49319100  | 0.52515200  |
| C | -5.07481700 | 3.77997400  | 1.11198600  |
| H | -3.59096800 | 5.25729500  | 1.63271900  |
| H | -6.30645500 | 2.08918400  | 0.58750900  |
| H | -5.90361000 | 4.48136500  | 1.14230500  |
| C | -2.18570900 | -0.89161500 | 1.20469000  |
| C | -3.10960700 | -1.20594900 | 2.21781400  |
| C | -1.71191800 | -1.91853000 | 0.37493300  |
| C | -3.54852900 | -2.51747800 | 2.39284000  |
| H | -3.49350000 | -0.42858600 | 2.87203300  |
| C | -2.14475100 | -3.23447900 | 0.56062500  |
| H | -0.99570500 | -1.68554300 | -0.40838800 |
| C | -3.06269600 | -3.53506700 | 1.56732500  |
| H | -4.26287300 | -2.74566900 | 3.17866700  |
| H | -1.75911400 | -4.02014700 | -0.08215500 |
| H | -3.39695400 | -4.55840400 | 1.71331100  |
| C | 2.33390900  | 0.30588700  | 1.51560200  |
| H | 2.11205000  | -0.72561900 | 1.22224300  |
| H | 3.42174400  | 0.37946100  | 1.61750200  |
| C | -0.83196700 | 1.07594400  | 2.76953400  |
| H | -0.51759700 | 2.11875800  | 2.88241900  |
| H | -1.66719200 | 0.91768400  | 3.45876600  |
| C | 1.72638300  | 0.60189800  | 2.88435100  |
| H | 1.79695900  | 1.67637600  | 3.10968900  |
| C | 0.29785000  | 0.12798600  | 3.16428900  |
| H | 0.14745300  | -0.86786600 | 2.71804500  |
| O | 2.47167700  | -0.14361700 | 3.84261000  |
| O | 0.30897400  | 0.02504800  | 4.58511000  |
| C | 1.63441400  | -0.35116800 | 4.99575000  |
| C | 1.68788900  | -1.83109600 | 5.35977100  |
| H | 2.71671800  | -2.12909900 | 5.58462400  |
| H | 1.06504900  | -2.02760400 | 6.23761500  |
| H | 1.32475100  | -2.43927700 | 4.52588400  |
| C | 2.05545300  | 0.56809700  | 6.13688300  |
| H | 1.36172500  | 0.47039800  | 6.97771900  |
| H | 3.06177800  | 0.30977800  | 6.47995900  |
| H | 2.05148100  | 1.61007600  | 5.80323000  |
| C | -4.52104500 | -0.21191000 | -4.36353100 |
| C | -4.08435500 | 0.60047200  | -3.31490100 |
| C | -4.88291200 | 1.61688400  | -2.79033600 |
| C | -6.15181000 | 1.79287300  | -3.34153900 |
| C | -6.59928000 | 0.97013700  | -4.38646600 |
| C | -5.78869600 | -0.04187500 | -4.91057300 |
| C | -3.42488200 | -1.17396300 | -4.72296100 |

|    |             |             |             |
|----|-------------|-------------|-------------|
| H  | -4.52312600 | 2.24262500  | -1.98138200 |
| H  | -6.80152700 | 2.57584300  | -2.96197200 |
| H  | -7.59158800 | 1.12553100  | -4.79995700 |
| H  | -6.14306700 | -0.66742500 | -5.72498300 |
| H  | -3.71255200 | -2.22407500 | -4.60336300 |
| N  | -2.34749700 | -0.82246700 | -3.77357300 |
| C  | -2.71087400 | 0.20709000  | -2.94130600 |
| O  | -2.04178600 | 0.73696800  | -2.03342500 |
| H  | -3.06474800 | -1.04168900 | -5.75090100 |
| C  | 0.04223200  | -0.68325500 | -4.07179300 |
| C  | -1.06156500 | -1.43513400 | -3.89681700 |
| H  | 0.99588800  | -1.20622000 | -4.10313300 |
| C  | -1.04720400 | -2.92038300 | -3.86673400 |
| C  | -0.13028700 | -3.64544100 | -4.64739200 |
| C  | -1.95227100 | -3.63475800 | -3.06217000 |
| C  | -0.09930100 | -5.03828400 | -4.60169900 |
| H  | 0.54450200  | -3.11472300 | -5.31264500 |
| C  | -1.92572200 | -5.02892900 | -3.02410200 |
| H  | -2.66786500 | -3.09295700 | -2.45019100 |
| C  | -0.99654100 | -5.73629800 | -3.79024400 |
| H  | 0.61450900  | -5.57983900 | -5.21584800 |
| H  | -2.63408900 | -5.56341900 | -2.39686500 |
| H  | -0.97988200 | -6.82192900 | -3.76474600 |
| C  | 0.09462200  | 0.80933400  | -4.18838600 |
| C  | 0.77544300  | 1.50577200  | -2.99241800 |
| H  | 0.67516400  | 1.07296700  | -5.08672800 |
| H  | -0.90526200 | 1.22305600  | -4.34171800 |
| H  | 1.85238000  | 1.33630700  | -3.05054800 |
| C  | 0.51710400  | 3.01556900  | -3.02158000 |
| H  | 0.77923300  | 3.40019800  | -4.02057000 |
| H  | -0.53659500 | 3.26166100  | -2.84763800 |
| H  | 1.12767300  | 3.56129100  | -2.29763200 |
| H  | 0.76737400  | 0.20618800  | -1.98437400 |
| Rh | -0.11654000 | 1.03215200  | -0.98882000 |

**TS9b**

|   |             |             |             |
|---|-------------|-------------|-------------|
| P | -1.23551400 | -0.25431600 | 0.89947800  |
| P | 1.47235900  | -1.98187800 | -0.65527000 |
| C | -1.84808900 | 1.43591500  | 1.32093900  |
| C | -0.89602600 | 2.42560500  | 1.61904200  |
| C | -3.20942300 | 1.75731900  | 1.40094500  |
| C | -1.29947900 | 3.69695400  | 2.02607500  |
| H | 0.16459900  | 2.20524800  | 1.53093300  |
| C | -3.61110000 | 3.03543500  | 1.79965600  |

|   |             |             |             |
|---|-------------|-------------|-------------|
| H | -3.96263300 | 1.01206100  | 1.16741100  |
| C | -2.66021600 | 4.00347500  | 2.12307600  |
| H | -0.55179600 | 4.44678100  | 2.26971400  |
| H | -4.67035600 | 3.26787900  | 1.86462200  |
| H | -2.97487700 | 4.99132400  | 2.44762800  |
| C | -2.72506200 | -1.33752700 | 0.86991300  |
| C | -3.52624400 | -1.55969300 | 2.00490400  |
| C | -3.05321700 | -1.99356100 | -0.32588500 |
| C | -4.62090700 | -2.42128200 | 1.94100300  |
| H | -3.30236900 | -1.05934800 | 2.94261700  |
| C | -4.15184900 | -2.85460600 | -0.39042000 |
| H | -2.44871600 | -1.82738200 | -1.21423900 |
| C | -4.93378500 | -3.07243100 | 0.74417600  |
| H | -5.22862900 | -2.58558900 | 2.82621800  |
| H | -4.39310200 | -3.34746900 | -1.32746300 |
| H | -5.78513500 | -3.74562500 | 0.69902000  |
| C | 1.33793600  | -3.06913100 | -2.14128100 |
| C | 0.12353900  | -3.73905700 | -2.37382000 |
| C | 2.37006400  | -3.19546600 | -3.08477200 |
| C | -0.04855200 | -4.52386700 | -3.51432700 |
| H | -0.69825600 | -3.65093000 | -1.66878900 |
| C | 2.19377400  | -3.98043400 | -4.22683700 |
| H | 3.31962300  | -2.69414800 | -2.92835700 |
| C | 0.98677500  | -4.64691100 | -4.44407900 |
| H | -0.99189800 | -5.03738100 | -3.67545700 |
| H | 3.00578300  | -4.07442400 | -4.94232500 |
| H | 0.85468400  | -5.26164000 | -5.32976800 |
| C | 3.27327000  | -1.75066600 | -0.34534500 |
| C | 4.13693600  | -2.86209700 | -0.33900000 |
| C | 3.79754400  | -0.48729700 | -0.03537300 |
| C | 5.49090300  | -2.70532900 | -0.04710300 |
| H | 3.75897300  | -3.85325800 | -0.57238700 |
| C | 5.15382200  | -0.33300900 | 0.26026300  |
| H | 3.14296200  | 0.37833700  | -0.01595400 |
| C | 6.00253400  | -1.43988700 | 0.25182600  |
| H | 6.14531800  | -3.57212400 | -0.05128400 |
| H | 5.54329100  | 0.65264100  | 0.49805100  |
| H | 7.05757200  | -1.31985500 | 0.48022300  |
| C | -0.45066700 | -0.66560400 | 2.55102900  |
| H | 0.43729100  | -0.03379500 | 2.66099400  |
| H | -1.15355700 | -0.35664100 | 3.33170900  |
| C | 1.02339500  | -3.18779700 | 0.69305300  |
| H | 0.00683500  | -3.55801800 | 0.52503800  |
| H | 1.69849700  | -4.04114800 | 0.57327100  |

|   |             |             |             |
|---|-------------|-------------|-------------|
| C | -0.08777600 | -2.12487100 | 2.78875400  |
| H | -0.93387500 | -2.77773000 | 2.52247700  |
| C | 1.18017900  | -2.65642900 | 2.11712800  |
| H | 1.97181300  | -1.89175900 | 2.16885600  |
| O | 0.22957900  | -2.28005900 | 4.16770200  |
| O | 1.51154500  | -3.75270000 | 2.96279900  |
| C | 1.08518100  | -3.42995700 | 4.29992100  |
| C | 2.27778500  | -3.03664500 | 5.16436200  |
| H | 1.93830700  | -2.71037000 | 6.15230600  |
| H | 2.95277600  | -3.88877600 | 5.28816200  |
| H | 2.82793600  | -2.21427600 | 4.69741000  |
| C | 0.30651800  | -4.62085900 | 4.84788400  |
| H | 0.93923500  | -5.51380100 | 4.86153900  |
| H | -0.03229300 | -4.41479700 | 5.86763000  |
| H | -0.56597100 | -4.82388000 | 4.21974600  |
| C | -3.27557800 | 3.31305700  | -3.78439400 |
| C | -2.52197000 | 3.24705800  | -2.60972600 |
| C | -2.48107500 | 4.30010700  | -1.69652300 |
| C | -3.22454800 | 5.44138500  | -1.99542900 |
| C | -3.98279200 | 5.51398800  | -3.17395300 |
| C | -4.01891300 | 4.45043900  | -4.08204600 |
| C | -3.10628500 | 2.02741800  | -4.54740900 |
| H | -1.89412000 | 4.22167800  | -0.78771600 |
| H | -3.21880700 | 6.28432100  | -1.31092900 |
| H | -4.55332200 | 6.41373700  | -3.38562800 |
| H | -4.61052500 | 4.52000600  | -4.99053300 |
| H | -4.04888000 | 1.49263400  | -4.70638700 |
| N | -2.20507300 | 1.24489300  | -3.67731000 |
| C | -1.83842600 | 1.94289100  | -2.55562500 |
| O | -1.07365100 | 1.57107700  | -1.64468200 |
| H | -2.63561100 | 2.17288800  | -5.52800800 |
| C | -0.40680400 | -0.30161100 | -4.10749900 |
| C | -1.73087700 | -0.04742800 | -4.05611900 |
| H | -0.10751300 | -1.32642400 | -4.31760600 |
| C | -2.77655200 | -1.05031400 | -4.38802300 |
| C | -2.55390200 | -2.01039600 | -5.39098300 |
| C | -4.01566000 | -1.05510200 | -3.72292100 |
| C | -3.52750100 | -2.95887100 | -5.70025800 |
| H | -1.62192200 | -1.99397800 | -5.94786800 |
| C | -4.99361400 | -1.99821500 | -4.04063600 |
| H | -4.20834100 | -0.32402400 | -2.94247500 |
| C | -4.75234900 | -2.95627000 | -5.02807800 |
| H | -3.33863900 | -3.68644100 | -6.48465400 |
| H | -5.94558500 | -1.98212500 | -3.51706100 |

|    |             |             |             |
|----|-------------|-------------|-------------|
| H  | -5.51690000 | -3.68486500 | -5.28173100 |
| C  | 1.59454300  | 0.40539100  | -2.74049100 |
| C  | 0.71549100  | 0.69529800  | -3.96828300 |
| H  | 2.20255800  | -0.48597300 | -2.89988900 |
| H  | 2.29933600  | 1.23761500  | -2.62131500 |
| H  | 1.46970700  | 0.72615900  | -1.11244400 |
| H  | 0.29745700  | 1.70023700  | -3.86517100 |
| C  | 1.58259300  | 0.68279700  | -5.24851200 |
| H  | 2.40453000  | 1.40251200  | -5.16360200 |
| H  | 2.01719000  | -0.30916900 | -5.41950600 |
| H  | 0.98716900  | 0.94860600  | -6.12977900 |
| Rh | 0.18360900  | -0.14505200 | -1.08109800 |
